# Supplementary material for: Distinct gene-set burden patterns underlie common generalized and focal epilepsies
Source: PubMed Central journal article supplement (PMC8479647; doi:10.1016/j.ebiom.2021.103588), 2021-09-24
Supplement: mmc1.pdf [file mmc1.pdf]

## Supplemental Information to the Article

### Distinct gene-set burden patterns underlie common generalized and focal epilepsies

Mahmoud Koko, Roland Krause, Thomas Sander, Dheeraj Reddy Bobbili, Michael Nothnagel, Patrick May, Holger Lerche, and the Epi25 Collaborative

#### Table of Contents

##### Supplemental Methods:

|                                  |   |
|----------------------------------|---|
| Sample cohorts overview          | 1 |
| Baseline sample quality control  | 1 |
| Baseline variant quality control | 2 |
| Residual stratification          | 2 |
| Qualifying Variants              | 2 |
| Burden testing in gene-sets      | 3 |
| Secondary analysis               | 4 |
| References                       | 4 |

##### Supplemental Tables:

|                                                                     |   |
|---------------------------------------------------------------------|---|
| Table S1: Epilepsy samples analysed in this study                   | 6 |
| Table S2: Control datasets analysed in this study                   | 6 |
| Table S3: Summary of baseline sample-level quality control          | 6 |
| Table S4: Final sample counts                                       | 7 |
| Table S5: Final variant statistics                                  | 7 |
| Table S6: Classes of variants used for the gene-set burden analysis | 8 |
| External tables                                                     | 8 |

##### Supplemental Figures:

|                                                                                                                                 |    |
|---------------------------------------------------------------------------------------------------------------------------------|----|
| Figure S1: Outlines of the burden analysis method                                                                               | 9  |
| Figure S2: Variant calling metrics of sequencing cohorts grouped by capture kits                                                | 10 |
| Figure S3: Heterozygosity and kinship filtering                                                                                 | 11 |
| Figure S4: Continental ancestry groups                                                                                          | 12 |
| Figure S5: Baseline case-control matching and variant harmonization                                                             | 13 |
| Figure S6: Final case-control matching                                                                                          | 14 |
| Figure S7: Variant counts and calling metrics in the final sample set                                                           | 15 |
| Figure S8: Quantile-Quantile plots of gene collapsing analysis of ultra-rare synonymous variants                                | 18 |
| Figure S9: Allele counts of ultra-rare missense and protein truncating variants                                                 | 19 |
| Figure S10: Distribution of qualifying variants in cases and controls                                                           | 21 |
| Figure S11: Variants load in highly constrained regions                                                                         | 23 |
| Figure S12: Burden of ultra-rare variants in loss-of-function intolerant genes                                                  | 25 |
| Figure S13: Burden in brain-expressed missense intolerant genes                                                                 | 26 |
| Figure S14: Burden of ultra-rare variants in groups of epilepsy-related disease genes                                           | 27 |
| Figure S15: Gene-sets with substantial differences in URVs burden in GGE vs. NAFE                                               | 28 |
| Figure S16: Burden in groups of axon initial segment and synaptic genes                                                         | 29 |
| Figure S17: Burden in neuronal gene groups from KEGG and Reactome                                                               | 30 |
| Figure S18: Burden in groups of genes not expressed in the brain                                                                | 31 |
| Figure S19: Burden in gene-sets from KEGG metabolic pathways                                                                    | 32 |
| Figure S20: Burden in gene-sets from KEGG cancer pathways                                                                       | 33 |
| Figure S21: Overlap between gene-sets representing the GABAergic and glutamatergic pathways (KEGG) and synapses (Gene Ontology) | 34 |
| Figure S22: Overlap between an epilepsy-related co-expression module and groups representative of known disease genes           | 35 |
| Figure S23: Burden in KEGG Type II Diabetes pathway genes with and without <i>CACNA1A/E</i>                                     | 36 |
| Figure S24: Secondary analyses to exclude capture kit artifacts                                                                 | 37 |

##### Epi25 Collaborative: Authors' Information:

|                                                |    |
|------------------------------------------------|----|
| Committees and authors from individual cohorts | 38 |
| Affiliations                                   | 39 |

## Supplemental Methods

### Sample cohorts overview:

Access to two sets of variant calls (separate but jointly called VCF files) mapped to the human genome build GRCh37 was granted by the Epi25 Collaborative.<sup>1</sup> The first set ( $n=13,497$ ) contained calls from patients ( $n=13,197$ ) and controls ( $n=300$ ) collected by the Epi25 Collaborative. The second set ( $n=12,999$ ) included controls from the Swedish Schizophrenia Study (S-SCZ; dbGAP accession number phs000473.v2.p2), patients and controls from the Myocardial Infarction Genetics (MIGen) Consortium cohorts (dbGAP accession numbers: phs000814.v1.p1, phs001000.v1.p1, phs000806.v1.p1) with access permission granted from dbGAP.<sup>2</sup> The data generation process has been previously described.<sup>1</sup> The exome sequencing was performed on an Illumina HiSeq 2000 or 2500 (Illumina, USA) at the Broad Institute (different patches or timepoints) and utilized Illumina TruSeq/Nextera (Epi25), Illumina's ICE Capture (MIGen), or Agilent SureSelect Human All Exon Kits (MIGen and S-SCZ) (Agilent, USA). Following quality control and harmonization steps outlined hereafter, 58% of the initial cases (Table S1) and 30% of the control samples (Table S2) were included in the final analysis.

### Baseline sample quality control:

Cases with a diagnosis other than a Developmental and Epileptic Encephalopathy (DEE), a Genetic Generalized Epilepsy (GGE) or a Non-Acquired Focal Epilepsy (NAFE) were removed. The case definitions from the Epi25 Collaborative can be accessed online (<http://epi-25.org/epi25-data-checks>). Controls from MIGen cohorts with a coronary artery disease were not included in the analysis to avoid any prominent overlap in genetic predisposition. Gencode coding sequence<sup>3</sup> (CDS) boundaries (v33 lifted to b37) were padded with 10 bp and masked for low complexity and repeat regions (stratification files dated March 9, 2017), obtained from the Global Alliance for Genomics and Health<sup>4</sup> resource, using bedtools<sup>5</sup> v2.29.2. All subsequent sample quality control, variant quality control and final analysis was performed over these regions (totalling 38Mb). The variant calling metrics were gathered for the two datasets over the CDS boundaries described above using the Genome Analysis Toolkit<sup>6</sup> v4.1.4.1 (gatk CollectVariantCallingMetrics). Outliers beyond 4 absolute deviations (per cohort) on total single nucleotide variants (snvs) count, insertions-deletions (indels) count, transition-transversion ratio (TiTv ratio), insertions-deletions ratio (Ins-Del ratio), or homozygous-heterozygous variants ratio (Hom-Het ratio) were filtered (Figure S2). The VCF files were converted to PLINK<sup>7</sup> v1.9 binaries (plink --vcf --make-bed) and merged (plink --bmerge). The genotyping rate (plink --missing) per sample was then calculated over the target CDS boundaries. Samples with genotyping rate less than 90% were filtered (Figure S2). PLINK was used to select a set of informative SNPs with missingness less than 0.01, minor allele frequency exceeding 0.05, and in Hardy-Weinberg Equilibrium (plink --snps-only --maf 0.05 --geno 0.01 --hwe midp include-nonctrl 10e-6). These were then pruned (plink --indep-pairwise 50 5 0.5) and used to estimate autosomal heterozygosity (plink --het) using the F-statistic. Outliers beyond 3 standard deviations were filtered (Figure S3). Informative SNPs (as detailed above) located on chrX were split (plink --split-x b37), pruned, and then used to estimate the F-statistic over chrX (plink --check-sex). Following visualization, cut-offs of  $F \leq 0.2$  (females) and  $F \geq 0.6$  (males) were used for SNP-sex prediction. Samples with ambiguous ( $0.2 < F < 0.6$ ) or discordant sequencing and reported sex were filtered (Figure S3). KING<sup>8</sup> v2.2.4 was used to detect duplicate samples and estimate the relatedness (king --related --degree 3). For each pair from duplicates and related samples up to the 3rd degree (Figure S3), the sample with the lower genotyping rate was filtered. KING was used to perform multidimensional scaling (MDS) (5 principal components) on genotyping data from 2,451 samples from 1000 Genomes Project phase 2 followed by projection of the case and control samples into the 1000 Genomes<sup>9</sup> space (king --mds --projection). A subset of variants ( $n=73,080$ ) that are called both in the 1000 Genomes data and our dataset were selected for projection. The eigenvectors (five principal components) from a randomly selected subset of 1000 Genomes samples (80% of samples) were used to train a Support Vector Machine (SVM), as implemented in R package *e1071*.<sup>10</sup> A radial kernel was used to recognize four major continental ancestry groups: non-Finnish Europeans "EUR" (excluding "FIN" population), African "AFR", admixed American "AMR", South and East Asian "ASI" (including "EAS" and "SAS" super-populations). The SVM was tested on the remaining 1000 Genomes samples (20%), where it correctly recalled all samples from the European ancestry group, then used to classify the cases and control study samples (Figure S4). Samples with a predicted ancestry other than European were filtered. These filtering steps removed 7,511 samples. To maximize the case-control matching among the remaining 18,985 samples, MDS (10 principal components) was repeated on a subset of samples from 1000 Genomes, of reported European ancestry ( $n=500$ , Northern and Western Europeans from Utah "CEU", British in England and Scotland "GBR", Tuscany in Italy "TSP", Iberian from Spain "IBS", Finnish in Finland "FIN"). The ancestry projection of the study samples labelled as European by the SMV (variants selected as indicated above) was repeated on this MDS space of European 1000 Genomes populations (Figure S4). Upon visualization of the first two principal components,

samples clustering with Finnish Europeans were removed ( $PC1 > 0.04$ ). To remove poorly matched cases and controls, the Euclidean distance between all pairs of remaining case and control samples (on  $PC1/PC2$ ) was calculated. Outlier samples (beyond 3 median absolute deviations) were filtered. The final set of baseline-filtered samples (Figure S5) constituted 7,836 cases and 8,822 controls ( $n=16,661$ ) as detailed in Table S3.

### Baseline variant quality control:

Two VCFs (see *Sample cohorts overview* above) containing 6,429,324 jointly called sites annotated with variant quality scores log odds (VQS Lod) were merged using bcftools/htslib<sup>11</sup> v1.10.2 and sites located outside the target CDS boundaries (see *Baseline sample quality control* above) and sites with low recalibrated variant quality scores (SNPs VQS Lod  $< -3.0998$  and Indel VQS Lod  $< 0.8107$  corresponding to VQSR sensitivity tranche 99.6 and 95.00, respectively) were filtered (bcftools merge -f "PASS,." -R; bcftools view -c1 -S). The variants were allele-split and normalized using bcftools (bcftools norm -w 500 -c w) and vt<sup>12</sup> v0.57721 (vt sort -m local). The merged and normalized VCF was subset to the baseline filtered samples identified as detailed above (bcftools view -c1 -S). Genotype calls with depth  $< 10$ , quality  $< 20$ , or half-missing calls were set to missing (bcftools +setGT). Heterozygous genotypes with allele depth to total depth ratio  $< 0.25$  were set to reference calls (bcftools +setGT). Variants with allele count equal to 0 were removed (bcftools view -c 1). These filtering steps were performed on a binary VCF stream piped between the outlined commands. Afterwards, the depth of coverage per variant was calculated (bcftools query -f "[%FORMAT\tDP]\n"). Only variants covered at a minimum depth of 10x in 95% of the baseline filtered cases and control sets were kept. Additionally, the distribution of the difference in mean coverage and the percentage of samples covered at depth 10x was visualized. All outlier variants beyond 3 standard deviations were filtered. The statistical calculations were performed in R<sup>13</sup> v3.3. This quality control process resulted in a well-harmonized coverage between cases and controls (Figure S5).

### Residual stratification:

To maximize the cohort, sample and variant matching, we performed multiple rounds of principal component analyses (PCA) coupled with coverage harmonization among cohorts. To remove poorly matching sample cohorts, a baseline round of PCA (10 principal components) was performed using PLINK (plink --pca) on a set of pruned variants (pruning was performed as described above). A cohort of Swedish controls ( $n=4,838$ ) clustered poorly with the rest of the study samples on the top principal components ( $PC1/2$ ) (Figure S6) and was therefore excluded. We then calculated the variant call rates (bcftools +fill-tags -S) across the remaining cohorts (Epi25, Leicester, Ottawa, ATVB), and removed all variants where any given cohort had a coverage  $< 95\%$  (defined as the number of samples with non-missing genotype calls divided by the total number of samples in the cohort) or if the difference in coverage between any two given cohorts exceeded 0.5%. Variants not in Hardy-Weinberg equilibrium ( $p$  value  $< 10^{-6}$ ) were identified (plink --hwe) and filtered. This filtering insured that the top principal components would capture the ancestry and not the exome capture kits differences (Figure S6). A second round of PCA (10 principal components) using EIGENSTRAT<sup>14,15</sup> v6.1.4 was performed (smartpca -p; outlier vectors = 2, outliers sigma = 6, iterations = 5) complemented by removal of extreme outliers identified upon visual inspection ( $PC1/PC2$ ). A small subset of poorly matched samples ( $n=272$ ) was subsequently removed. A third and final round of PCA with identical EIGENSTRAT parameters showed a well-matched case-control cohort (Figure S6). The variant calling metrics were balanced for this set (gatk CollectVariantCallingMetrics) (Figure S7).

### Qualifying Variants:

Variant effects and consequences were annotated using snpEff<sup>16</sup> v4.3t. Annovar<sup>17</sup> v20191024 was then used to annotate population frequencies from gnomAD<sup>18</sup> r2.1 and DiscovEHR<sup>19</sup> Freeze 50 as well as the following missense *in-silico* pathogenicity predictions: Sorting Intolerant From Tolerant (SIFT),<sup>20</sup> PolyPhen2 (PPh2) Human Diversity-based predictions,<sup>21</sup> Missense-badness PolyPhen2 and Constraint (MPC) score,<sup>22</sup> Missense Tolerance Ratio (MTR) score,<sup>23</sup> and Paralog conservation (para-Z) score.<sup>24</sup> Consensus Coding Region (CCR) scores<sup>25</sup> were annotated using tabix.<sup>26</sup> PPh2 and SIFT are two conventional, *in-silico* missense deleteriousness scores that are widely used in genetic studies to identify likely benign and likely deleterious variants based on a number of features including the sequence, phylogenetic and structural information. MPC score aims to identify regions within genes that are specifically depleted of missense variation and combines this information with variant-level metrics that measures the increased deleteriousness of amino acid substitutions when they occur in missense-constrained regions. MTR score estimates the intolerance of genic regions by comparing the observed proportion of missense variation to the expected proportion in the sequence context of the protein-coding region under study. While MPC and MTR scores are scaled down to individual missense alterations, CCR score aims to identify coding regions that are completely devoid of variation in the population. Functionally critical protein

regions are usually encoded by bases in regions with high CCR scores. Paralog conservation-based missense variant analysis was recently shown to aid variant prioritization in neurodevelopmental disorders and it has been proposed that most disease genes in humans have paralogs. Ultra-rare variants (URVs) were defined as follows: 1. Allele Count ( $AC_{\text{Analysis}} \leq 3$ , where  $AC_{\text{Analysis}} = AC_{\text{Epilepsy-type}} + AC_{\text{Controls}}$  (epilepsy types: DEE, GGE, or NAFE depending on the analysis); 2. Not present in DiscovEHR ( $MAF_{\text{DiscovEHR}} = 0$ ); 3. Allele Count  $\leq 5$  in gnomAD ( $MAF_{\text{gnomAD}} < 2 \times 10^{-5}$ ). The inclusion of gnomAD variants with low frequency allowed the use of control sets that overlap with gnomAD (Table S2), since gnomAD variants are filtered at a higher count (5 alleles) compared to the analysis set allele count (3 alleles). The ultra-rare variants were grouped in thirteen analysis classes as detailed in Table S6. The genotypes and annotations were queried using bcftools or snpEff and imported for statistical analysis in R<sup>13</sup> v3.3. These were collapsed in a dominant model (reference as 0, heterozygous, homozygous and hemizygous as 1) to obtain a matrix of *samples vs. genes* where the cells contained 0/1 indicators for the presence or absence of a qualifying variant (QV) in each given sample and gene. Single gene collapsing analysis was performed using Fisher Exact Test (FET). The Genomic Inflation Factor ( $\lambda$ ) was estimated using *QQ-perm*<sup>27</sup> by comparing observed vs. expected  $p$  values from a synonymous dominant model. Observed  $p$  values were calculated by performing a gene-level collapsing analysis for synonymous qualifying variants using FET. Permutation-based  $p$  values were obtained from 1000 permutations (shuffling of case-control labels followed by FET). This was performed with a parallel implementation of the *QQ-perm*<sup>27</sup> method using *parallel* package.<sup>13</sup> The resulting  $p$  values were ordered and the mean values per rank from these 1000 permutations were taken as the expected  $p$  values for ordered ranks, and the 2.5<sup>th</sup> – 97.5<sup>th</sup> centiles were taken as 95% confidence intervals. The negative  $\log_{10}$  of the observed  $p$  values was plotted against the negative  $\log_{10}$  of the mean permutation  $p$  values to obtain the *Quantile-Quantile* plots shown in Figure S8.

### Burden testing in gene-sets:

In total, 92 gene-sets (Table S7) were tested. The genes in each gene-set are given in Table S8. The construction of gene-sets leveraged multiple sources as detailed in Table S9. To ensure homogeneity between gene-sets obtained from different sources and snpEff annotations used in this study, each gene set was limited to those genes annotated with snpEff as protein coding genes using Ensembl gene IDs on GRCh37.75. Where available, Ensembl gene IDs were obtained from sources of gene-sets. Otherwise, *biomaRt* package<sup>28</sup> and gProfiler<sup>29</sup> were used to map Human Gene Nomenclature Consortium (HGNC) names and gene name synonyms to their Ensembl gene IDs. *biomaRt* was also used to map mouse genes to their human paralogues for two gene-sets as outlined in Table S9. For each of the three phenotypic groups (DEE, GGE, NAFE) and variant classes (Table S6), the qualifying variants tables (*samples vs. genes* tables with 0/1 status indicator as values; see Qualifying Variants above) were filtered for the genes in the gene-set under consideration. The QVs were then added per gene-set to calculate gene-set burden scores per sample (*samples vs. gene-set burden* table). Additional sample-level metrics were annotated (phenotype, sample sex, exome-wide singletons and variant counts, and ten principal components per sample). These data handling steps were performed in R v3.3 using R base, *data.table*<sup>30</sup> and *tidyverse*<sup>31</sup> packages. The resulting table (*samples* as rows vs. *phenotypes, gene-set QV burden scores* and *covariates* as columns) was used as input to perform binary logistic regression. The case-control status (indicator variable) was regressed on covariates only (null model) or gene-set burden scores and covariates (test model) as additive predictors using *glm*(family=binomial) function from *stats*<sup>13</sup> package. The null model was *glm*(sex + variant counts + singletons + PC1...PC10) and the test model was *glm*(QV burden + sex + variant counts + singletons + PC1... PC10). Likelihood Ratio Test (LRT) from *lmtree*<sup>32</sup> package was used to compare the test and null models. The LRT log-odds and their 95% confidence intervals were not corrected for multiple testing. Multiple gene-sets were tested in parallel using *parallel* package.<sup>13</sup>  $P$  values of test analyses of twelve variant classes were adjusted using Benjamini and Hochberg false discovery rate (FDR) method as implemented in *p.adjust*(method = "BH") from *stats* package. In total, FDR adjustments accounted for 3,312 tests (92 gene sets x 12 classes x 3 phenotypes). The  $p$  values from the analysis of the synonymous class of variants were not FDR-adjusted, similar to previous analysis approaches.<sup>1</sup> We presumed equal weights and direction of effects for the variants in the classes under analysis by taking the sum of QVs in a specific gene-set per sample as a predictor for a binary phenotype in a regression model. While this assumption is fairly reasonable for highly deleterious variants, it is rather simplistic for milder genetic alterations. This approach is also not ideal to estimate the odds in data sets with low counts. However, the computational ease, the clarity in setting up the analysis parameters in comparison to other variance component-based and hybrid methods, e.g., skat-o,<sup>33</sup> are key advantages that motivated this choice. The use of similar regression models has been shown to capture the major signals in gene-set burden analysis in epilepsy and other neurological diseases.<sup>1,34,35</sup>



## Secondary analysis:

Four secondary analyses were performed to explore the extent of the observed differences between GGEs and NAFEs and to exclude potential bias. The results of these secondary analysis are presented in Table S10 and Table S11.

1. A secondary analysis was performed on the 92 gene-sets but limited to autosomal genes (excluding all genes on chromosome X). The aim was to estimate the bias created by male-to-female ratios imbalance (Table S4).
2. Another secondary analysis was performed using MIGen Leicester samples (Illumina ICE capture kits) as cases vs. MIGen Ottawa/ATVB samples as controls (Agilent SureSelect capture kits) to exclude the presence of significant residual stratification between capture kits (Table S2). Comparisons between samples prepared using Illumina Nextera/TruSeq and Illumina ICE or Agilent SureSelect were not performed as these are almost identical to the primary analysis of epilepsy cases (Nextera/TruSeq) vs. controls (ICE & SureSelect) analysis.
3. Randomly selected GGEs (n=1,100) and controls (n=2,789) were tested to examine if these numbers are enough to capture the main signals, in order to confirm the validity of the control-control testing. We did 500 permutations, using the CCR80 class of variants, taking the mean of the odds, 2.5<sup>th</sup>/97.5<sup>th</sup> centiles of odds and average *p* values per tested gene set as an outcome of this permutation analysis. The random selection of samples and final summarisation of outcomes was done using R base functions.
4. A limit secondary analysis directly comparing the CCR80 class of variants between individuals with GGE and NAFE to validate the patterns observed in case vs. control comparisons.

## References:

1. Epi25 Collaborative. Ultra-Rare Genetic Variation in the Epilepsies: A Whole-Exome Sequencing Study of 17,606 Individuals. *American Journal of Human Genetics* 2019;**105**(2):267–82. <https://doi.org/10.1016/j.ajhg.2019.05.020>
2. Tryka KA, Hao L, Sturcke A, Jin Y, Wang ZY, Ziyabari L, et al. NCBI's Database of Genotypes and Phenotypes: dbGaP. *Nucleic Acids Res* 2014;**42**(D1):D975–9. <https://doi.org/10.1093/nar/gkt1211>
3. Frankish A, Diekhans M, Ferreira A-M, Johnson R, Jungreis I, Loveland J, et al. GENCODE reference annotation for the human and mouse genomes. *Nucleic Acids Res* 2019;**47**(D1):D766–73. <https://doi.org/10.1093/nar/gky955>
4. Krusche P, Trigg L, Boutros PC, Mason CE, De La Vega FM, et al. Best practices for benchmarking germline small-variant calls in human genomes. *Nat Biotechnol* 2019;**37**(5):555–60. <https://doi.org/10.1038/s41587-019-0054-x>
5. Quinlan AR, Hall IM. BEDTools: a flexible suite of utilities for comparing genomic features. *Bioinformatics* 2010;**26**(6):841–2. <https://doi.org/10.1093/bioinformatics/btq033>
6. McKenna A, Hanna M, Banks E, Sivachenko A, Cibulskis K, Kernytzky A, et al. The Genome Analysis Toolkit: A MapReduce framework for analyzing next-generation DNA sequencing data. *Genome Res* 2010;**20**(9):1297–303. <https://doi.org/10.1101/gr.107524.110>
7. Chang CC, Chow CC, Tellier LC, Vattikuti S, Purcell SM, Lee JJ. Second-generation PLINK: rising to the challenge of larger and richer datasets. *GigaScience* 2015;**4**(1):7. <https://doi.org/10.1186/s13742-015-0047-8>
8. Manichaikul A, Mychaleckyj JC, Rich SS, Daly K, Sale M, Chen W-M. Robust relationship inference in genome-wide association studies. *Bioinformatics* 2010;**26**(22):2867–73. <https://doi.org/10.1093/bioinformatics/btq559>
9. The 1000 Genomes Project Consortium. A global reference for human genetic variation. *Nature* 2015;**526**(7571):68–74. <https://doi.org/10.1038/nature15393>
10. Meyer et al. e1071: Misc Functions of the Department of Statistics, Probability Theory Group (Formerly: E1071), TU Wien. R package. <https://CRAN.R-project.org/package=e1071>.
11. Li H, Handsaker B, Wysoker A, Fennell T, Ruan J, Homer N, et al. The Sequence Alignment/Map format and SAMtools. *Bioinformatics* 2009;**25**(16):2078–9. <https://doi.org/10.1093/bioinformatics/btp352>
12. Tan A, Abecasis GR, Kang HM. Unified representation of genetic variants. *Bioinformatics* 2015;**31**(13):2202–4. <https://doi.org/10.1093/bioinformatics/btv112>
13. R Core Team. R: A language and environment for statistical computing. <https://www.R-project.org/>
14. Price AL, Patterson NJ, Plenge RM, Weinblatt ME, Shadick NA, Reich D. Principal components analysis corrects for stratification in genome-wide association studies. *Nat Genet* 2006;**38**(8):904–9. <https://doi.org/10.1038/ng1847>

15. Patterson N, Price AL, Reich D. Population Structure and Eigenanalysis. *PLoS Genet* 2006;**2**(12):e190. <https://doi.org/10.1371/journal.pgen.0020190>
16. Cingolani P, Platts A, Wang LL, Coon M, Nguyen T, Wang L, et al. A program for annotating and predicting the effects of single nucleotide polymorphisms, SnpEff: SNPs in the genome of *Drosophila melanogaster* strain w1118; iso-2; iso-3. *Fly* (Austin). 2012;**6**(2):80–92. <https://doi.org/10.4161/fly.19695>
17. Wang K, Li M, Hakonarson H. ANNOVAR: functional annotation of genetic variants from high-throughput sequencing data. *Nucleic Acids Res* 2010;**38**(16):e164–e164. Available from: <https://doi.org/10.1093/nar/gkq603>
18. Karczewski KJ, Francioli LC, Tiao G, Cummings BB, Alföldi J, et al. The mutational constraint spectrum quantified from variation in 141,456 humans. *Nature* 2020;**581**(7809):434–43. <https://doi.org/10.1038/s41586-020-2308-7>
19. Dewey FE, Murray MF, Overton JD, Habegger L, Leader JB, Fetterolf SN, et al. Distribution and clinical impact of functional variants in 50,726 whole-exome sequences from the DiscovEHR study. *Science* 2016;**354**(6319):aaf6814. <https://doi.org/10.1126/science.aaf6814>
20. Sim N-L, Kumar P, Hu J, Henikoff S, Schneider G, Ng PC. SIFT web server: predicting effects of amino acid substitutions on proteins. *Nucleic Acids Res* 2012;**40**(W1):W452–7. <https://doi.org/10.1093/nar/gks539>
21. Adzhubei IA, Schmidt S, Peshkin L, Ramensky VE, Gerasimova A, Bork P, et al. A method and server for predicting damaging missense mutations. *Nat Methods* 2010;**7**(4):248–9. <https://doi.org/10.1038/nmeth0410-248>
22. Samocha KE, Kosmicki JA, Karczewski KJ, O'Donnell-Luria AH, Pierce-Hoffman E, MacArthur DG, et al. Regional missense constraint improves variant deleteriousness prediction. *bioRxiv* 2017. <http://doi.org/10.1101/148353>
23. Traynelis J, Silk M, Wang Q, Berkovic SF, Liu L, Ascher DB, et al. Optimizing genomic medicine in epilepsy through a gene-customized approach to missense variant interpretation. *Genome Res* 2017;**27**(10):1715–29. <http://doi.org/10.1101/gr.226589.117>
24. Lal D, May P, Perez-Palma E, Samocha KE, Kosmicki JA, et al. Gene family information facilitates variant interpretation and identification of disease-associated genes in neurodevelopmental disorders. *Genome Med* 2020;**12**(1):28. <http://doi.org/10.1186/s13073-020-00725-6>
25. Havrilla JM, Pedersen BS, Layer RM, Quinlan AR. A map of constrained coding regions in the human genome. *Nat Genet.* 2019;**51**(1):88–95. <https://doi.org/10.1038/s41588-018-0294-6>
26. Li H. Tabix: fast retrieval of sequence features from generic TAB-delimited files. *Bioinformatics* 2011;**27**(5):718–9. <https://doi.org/10.1093/bioinformatics/btq671>
27. Petrovski S, Wang Q. QQperm: Permutation Based QQ Plot and Inflation Factor Estimation. R package. <https://CRAN.R-project.org/package=QQperm>
28. Durinck S, Spellman PT, Birney E, Huber W. Mapping identifiers for the integration of genomic datasets with the R/Bioconductor package biomaRt. *Nat Protoc* 2009;**4**(8):1184–91. <https://doi.org/10.1038/nprot.2009.97>
29. Reimand J, Arak T, Adler P, Kolberg L, Reisberg S, Peterson H, et al. g:Profiler—a web server for functional interpretation of gene lists (2016 update). *Nucleic Acids Res* 2016;**44**(W1):W83–9. <https://doi.org/10.1093/nar/gkw199>
30. Dowle M, Srinivasan A. data.table: Extension of `data.frame`. R package. <https://CRAN.R-project.org/package=data.table>
31. Wickham H, Averick M, Bryan J, Chang W, McGowan L, François R, et al. Welcome to the Tidyverse. *J Open Source Softw* 2019;**4**(43):1686. <https://doi.org/10.21105/joss.01686>
32. Hothorn T, Zeileis A, Farebrother RW, Cummings C. lmerTest: Testing Linear Regression Models. R package. <https://CRAN.R-project.org/package=lmerTest>
33. Lee S, Emond MJ, Bamshad MJ, Barnes KC, Rieder MJ, Nickerson DA, et al. Optimal Unified Approach for Rare-Variant Association Testing with Application to Small-Sample Case-Control Whole-Exome Sequencing Studies. *Am J Hum Genet* 2012;**91**(2):224–37. <https://doi.org/10.1016/j.ajhg.2012.06.007>
34. Epi4K consortium, Epilepsy Phenome/Genome Project. Ultra-rare genetic variation in common epilepsies: a case-control sequencing study. *Lancet Neurol* 2017;**16**(2):135–43. [https://doi.org/10.1016/S1474-4422\(16\)30359-3](https://doi.org/10.1016/S1474-4422(16)30359-3)
35. Genovese G, Fromer M, Stahl EA, Ruderfer DM, Chambert K, Landén M, et al. Increased burden of ultra-rare protein-altering variants among 4,877 individuals with schizophrenia. *Nat Neurosci* 2016;**19**(11):1433–41. <https://doi.org/10.1038/nn.4402>

## Supplemental Tables

**Table S1: Epilepsy samples analyzed in this study.**

| Phenotype group                                                                    | Total  | Phenotype review | Initial QC  | Final QC    |
|------------------------------------------------------------------------------------|--------|------------------|-------------|-------------|
| Developmental and Epileptic Encephalopathy                                         | 1,474  | 1,467            | 1,040 (71%) | 1,003 (68%) |
| Genetic Generalized Epilepsy                                                       | 4,510  | 4,471            | 3,183 (71%) | 3,064 (68%) |
| Non-Acquired Focal Epilepsy                                                        | 5,321  | 5,304            | 3,616 (68%) | 3,522 (66%) |
| Febrile Seizures and GEFS spectrum                                                 | 301    | Not considered   |             |             |
| Symptomatic / Lesional                                                             | 1,434  | Not considered   |             |             |
| Other epilepsies, unclassified epilepsies, non-epileptic seizures or not available | 157    | Not considered   |             |             |
| Total                                                                              | 13,197 | 11,242           | 7,839 (59%) | 7,589 (58%) |

**Table S2: Control datasets analyzed in this study.**

| Control set                                                 | Capture kits            | In dbGAP        | In gnomAD | Phenotype               | Total  | Initial QC  | Final QC    |
|-------------------------------------------------------------|-------------------------|-----------------|-----------|-------------------------|--------|-------------|-------------|
| Epi25 Collaborative controls (Italy)                        | Illumina TruSeq/Nextera | No              | No        | Unaffected              | 300    | 283 (94%)   | 283 (94%)   |
| Leicester Heart study (UK)                                  | Illumina ICE            | phs001000.v1.p1 | Yes       | Unaffected              | 1,100  | 1082 (98%)  | 1,082 (98%) |
|                                                             |                         |                 |           | Coronary Artery Disease | 65     | -           | -           |
| Ottawa Heart Study (Canada)                                 | Agilent SureSelect      | phs000806.v1.p1 | Yes       | Unaffected              | 987    | 946 (96%)   | 924 (94%)   |
|                                                             |                         |                 |           | Coronary Artery Disease | 928    | -           | -           |
| Atherosclerosis Thrombosis & Vascular Biology study (Italy) | Agilent SureSelect      | phs000814.v1.p1 | No        | Unaffected              | 1,802  | 1,673 (93%) | 1,673 (93%) |
|                                                             |                         |                 |           | Coronary Artery Disease | 1,875  | -           | -           |
| Swedish Schizophrenia Study (Sweden)                        | Agilent SureSelect      | phs000473.v2.p2 | Yes       | Unaffected              | 6,242  | 4,838 (78%) | -           |
| Total                                                       |                         |                 |           |                         | 13,299 | 8,822 (66%) | 3,962 (30%) |

**Table S3: Summary of baseline sample-level quality control.**

| Criteria                                | Filter                                                                     | Failing/Total (%)        |
|-----------------------------------------|----------------------------------------------------------------------------|--------------------------|
| Phenotype                               | Cases other than DEE, GGE, NAFE                                            | 1,773/13,197 (13.4%)     |
|                                         | Controls with cardiac phenotype                                            | 2,867/13,299 (21.6%)     |
| Variant calling metrics                 | Outliers > 4 absolute deviations on key metrics                            | 1,088/26,496 (4.1%)      |
| Genotyping rate                         | < 90% in called variants in coding regions                                 | 66/26,496 (0.2%)         |
| Autosomal heterozygosity                | Outliers > 3 standard deviations                                           | 1011/26,496 (3.8%)       |
| ChrX heterozygosity                     | 0.2 < F < 0.6 or discordant reported/predicted sex                         | 255/26,496 (1.0%)        |
| Kinship                                 | Duplicate, twin or related up to the 3 <sup>rd</sup> degree                | 331/26,496 (1.2%)        |
| Major continental ancestry              | Non-European ancestry predictions from SVM trained on 1000 Genomes samples | 2,057/26,496 (7.8%)      |
| Samples failing one or multiple filters |                                                                            | 7,511/26,496 (28.3%)     |
|                                         |                                                                            | 18,985 samples remaining |
| Matching                                | Finnish (MDS)/outliers on PCA (PC1/2)                                      | 2,324/18,985 (12.2%)     |
|                                         |                                                                            | 16,661 samples remaining |

**Table S4: Final sample counts.**

| Group    | Cohort    | Samples |      | Females (%)  |              |
|----------|-----------|---------|------|--------------|--------------|
| Cases    | DEE       | 7589    | 1003 | 4067 (53.6%) | 462 (46%)    |
|          | GGE       |         | 3064 |              | 1764 (57.6%) |
|          | NAFE      |         | 3522 |              | 1841 (52.3%) |
| Controls | Epi25     | 3962    | 283  | 767 (19.4%)  | 116 (40%)    |
|          | Ottawa    |         | 924  |              | 458 (49.7%)  |
|          | Leicester |         | 1082 |              | 1 (0.1%)     |
|          | ATVB      |         | 1673 |              | 192 (11.5%)  |
| All      |           | 11,551  |      | 4834 (41.8%) |              |

**Table S5: Final variant statistics.**

| Quality Control (QC) | Variants Count                                                                                                                                                                      |        | Samples   |
|----------------------|-------------------------------------------------------------------------------------------------------------------------------------------------------------------------------------|--------|-----------|
| Unfiltered           | Jointly called sites in all samples                                                                                                                                                 |        | 6,481,248 |
| Baseline QC          | In coding regions, normalized, genotype-filtered, filtered on variant quality score logarithm-of-odds, not in low-complexity regions, allele count > 0 in baseline-filtered samples |        | 2,224,099 |
|                      | Depth and call-rate harmonization                                                                                                                                                   |        | 1,674,222 |
| Final QC             | Allele count > 0 in final case-control set, cohort-level call-rate harmonization, in Hardy-Weinberg Equilibrium.                                                                    |        | 1,267,392 |
|                      | Total variants per variant category                                                                                                                                                 | SNVs   | 1,247,342 |
|                      |                                                                                                                                                                                     | Indels | 20,050    |
|                      | Variants with allele frequency < 0.5 %                                                                                                                                              |        | 1,203,350 |
|                      | Variants with allele counts 1-3                                                                                                                                                     |        | 1,054,919 |
|                      | Singleton variants                                                                                                                                                                  |        | 806,046   |

**Table S6: Classes of variant used for the gene-set burden analysis.**

| Variant classes                          | Control    |                 | Deleterious variants |     |                | Missense constraint |      |             |            |        | Paralog conservation  |                   |                          |
|------------------------------------------|------------|-----------------|----------------------|-----|----------------|---------------------|------|-------------|------------|--------|-----------------------|-------------------|--------------------------|
|                                          | Synonymous | Benign Missense | Damaging Missense    | PTV | All Functional | MPC1                | MPC2 | MTR ClinVar | MTR DeNovo | CCR 80 | Paralog non-conserved | Paralog conserved | Paralog highly conserved |
| synonymous_variant                       | +          | -               | -                    | -   | -              | -                   | -    | -           | -          | -      | -                     | -                 | -                        |
| missense_variant<br>(additional filters) | -          | +               | +                    | -   | +              | +                   | +    | +           | +          | +      | +                     | +                 | +                        |
| stop_gained                              | -          | -               | -                    | +   | +              | -                   | -    | -           | -          | -      | -                     | -                 | -                        |
| splice_acceptor_variant                  | -          | -               | -                    | +   | +              | -                   | -    | -           | -          | -      | -                     | -                 | -                        |
| splice_donor_variant                     | -          | -               | -                    | +   | +              | -                   | -    | -           | -          | -      | -                     | -                 | -                        |
| exon_loss_variant                        | -          | -               | -                    | +   | +              | -                   | -    | -           | -          | -      | -                     | -                 | -                        |
| frameshift_variant                       | -          | -               | -                    | +   | +              | -                   | -    | -           | -          | -      | -                     | -                 | -                        |
| start_lost                               | -          | -               | -                    | +   | +              | -                   | -    | -           | -          | -      | -                     | -                 | -                        |
| stop_lost                                | -          | -               | -                    | -   | +              | -                   | -    | -           | -          | -      | -                     | -                 | -                        |
| conservative_inframe_insertion           | -          | -               | -                    | -   | +              | -                   | -    | -           | -          | -      | -                     | -                 | -                        |
| disruptive_inframe_insertion             | -          | -               | -                    | -   | +              | -                   | -    | -           | -          | -      | -                     | -                 | -                        |
| conservative_inframe_deletion            | -          | -               | -                    | -   | +              | -                   | -    | -           | -          | -      | -                     | -                 | -                        |
| disruptive_inframe_deletion              | -          | -               | -                    | -   | +              | -                   | -    | -           | -          | -      | -                     | -                 | -                        |

**Table S7 – S12:** Large Supplemental Tables provided as separate excel files accessible on [Mendeley Data \[https://doi.org/10.17632/nmmz4wjvxxk.1\]](https://doi.org/10.17632/nmmz4wjvxxk.1)

**Table S7: Gene-sets.**

**Table S8: Genes in each gene-set.**

**Table S9: Burden of qualifying variants in 92 gene-sets.**

**Table S10: Top-ranking genes per gene-set.**

**Table S11: Secondary gene-set burden analysis results.**

**Table S12: Comparison of gene-set burden between GGEs and NAFEs.**

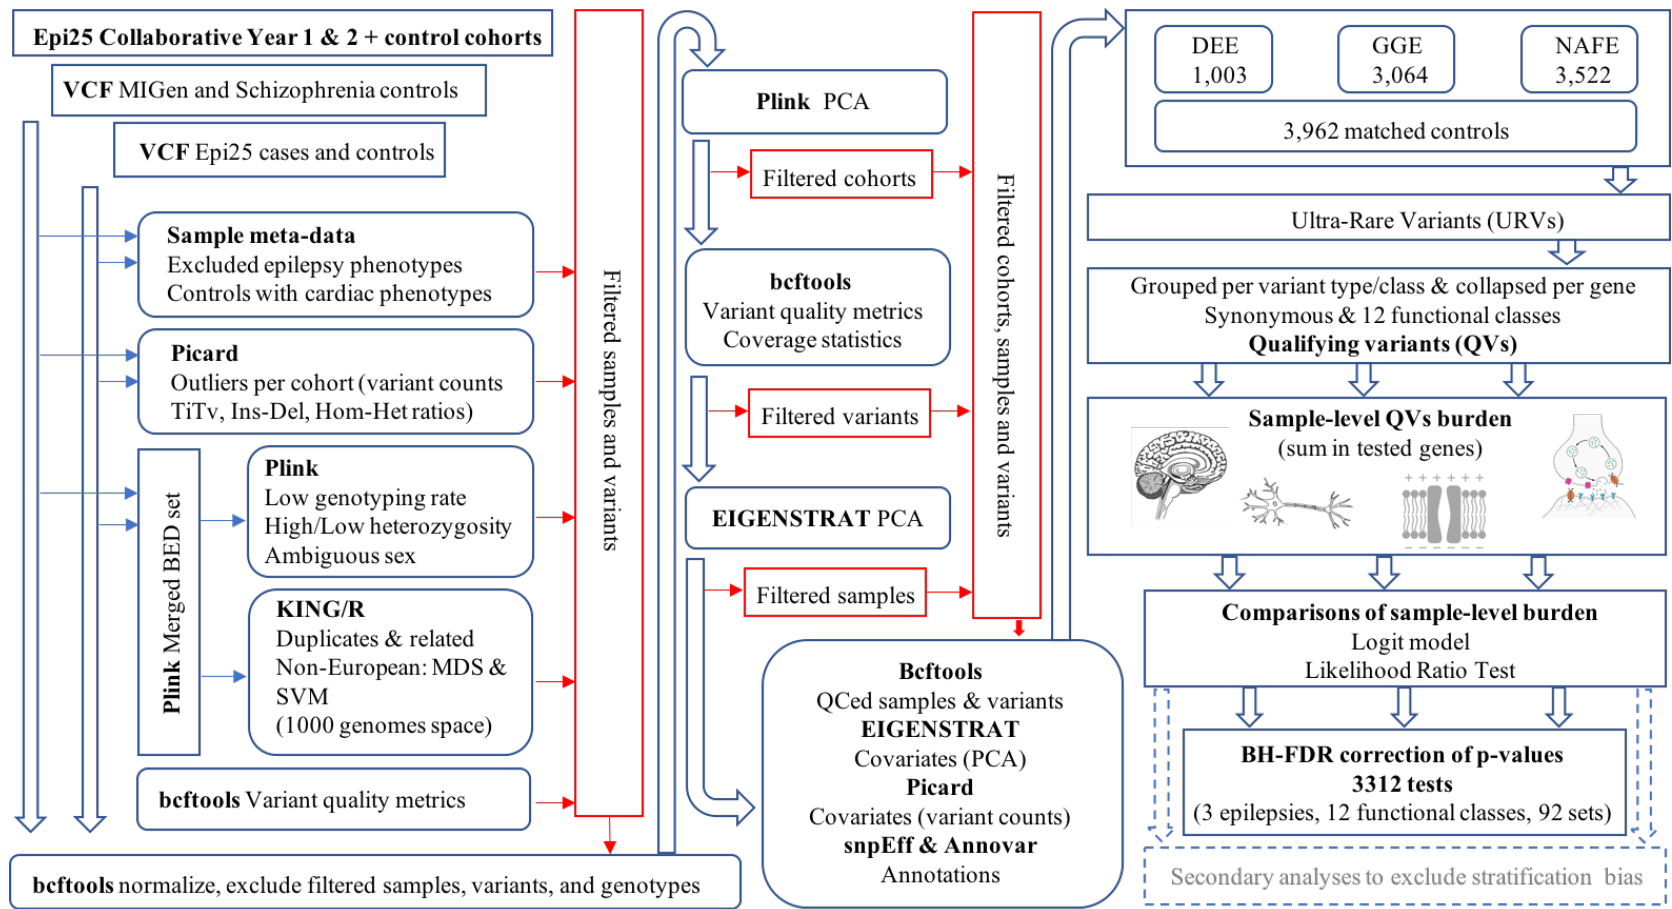

**Figure S1: Outlines of the burden analysis method.** Thirteen (twelve functional/non-synonymous and one synonymous) variants classes/types with focus on missense variants in constrained or paralog-conserved sites were tested in the three epilepsy phenotypes against a shared set of matched controls. The burden was examined in 92 gene-sets (detailed in Table 1) using a logistic regression model with the count of qualifying variants per sample as a predictor and sample sex, ten principal components, singletons and exome-wide variant counts as covariates. Secondary analyses: an analysis restricting the genes in all gene-sets to autosomal genes (to exclude bias introduced by male-to-female ratio imbalances), an analysis testing the controls prepared for exome sequencing using Illumina ICE capture kits against controls prepared with Agilent SureSelect capture kits (to exclude bias caused by differences in enrichment kits) coupled with an analysis of randomly selected cases and controls (500 permutations) to ensure adequate power, and a direct comparison of GGEs vs. NAFEs using highly constrained variants. BED: PLINK binary biallelic genotype table. BH-FDR: Benjamini-Hochberg False Discovery Rate. DEE: Developmental and Epileptic Encephalopathies. GGE: Genetic Generalized Epilepsies. Hom-Het: Homozygous-Heterozygous. Ins-Del : Insertion-Deletion. MDS: Multi-dimensional scaling. NAFE: Non-Acquired Focal Epilepsies. PCA: Principal Component Analysis. QCed: Quality-controlled. SVM: Support Vector Machine. TiTv: Transition-Transversion. VCF: Variant Call Format file.

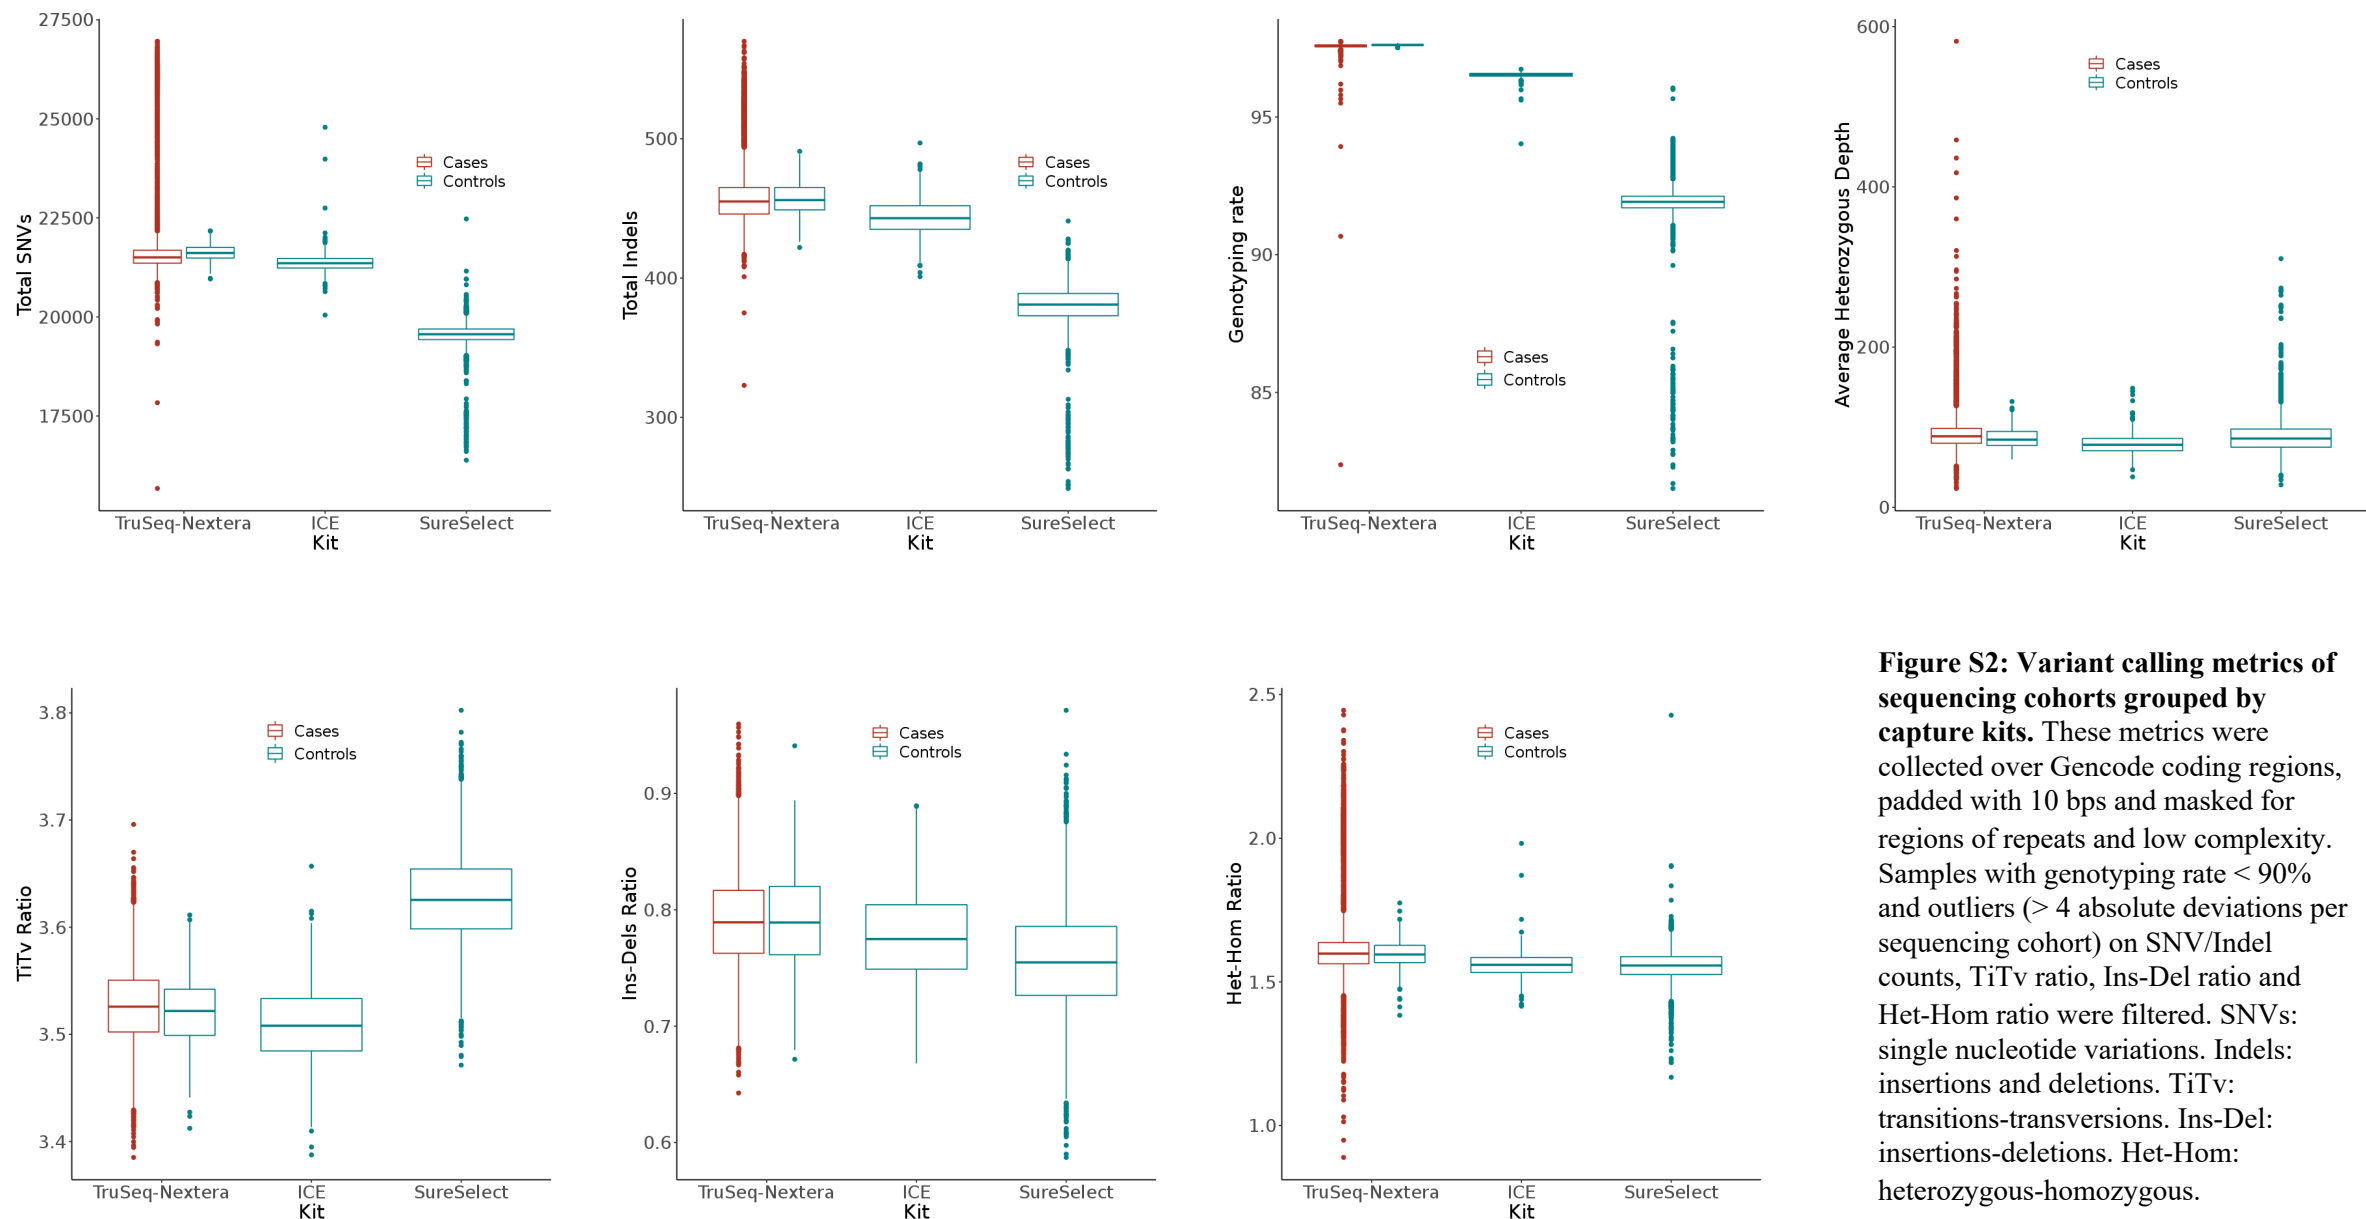

**Figure S2: Variant calling metrics of sequencing cohorts grouped by capture kits.** These metrics were collected over Gencode coding regions, padded with 10 bps and masked for regions of repeats and low complexity. Samples with genotyping rate < 90% and outliers (> 4 absolute deviations per sequencing cohort) on SNV/Indel counts, TiTv ratio, Ins-Del ratio and Het-Hom ratio were filtered. SNVs: single nucleotide variations. Indels: insertions and deletions. TiTv: transitions-transversions. Ins-Del: insertions-deletions. Het-Hom: heterozygous-homozygous.

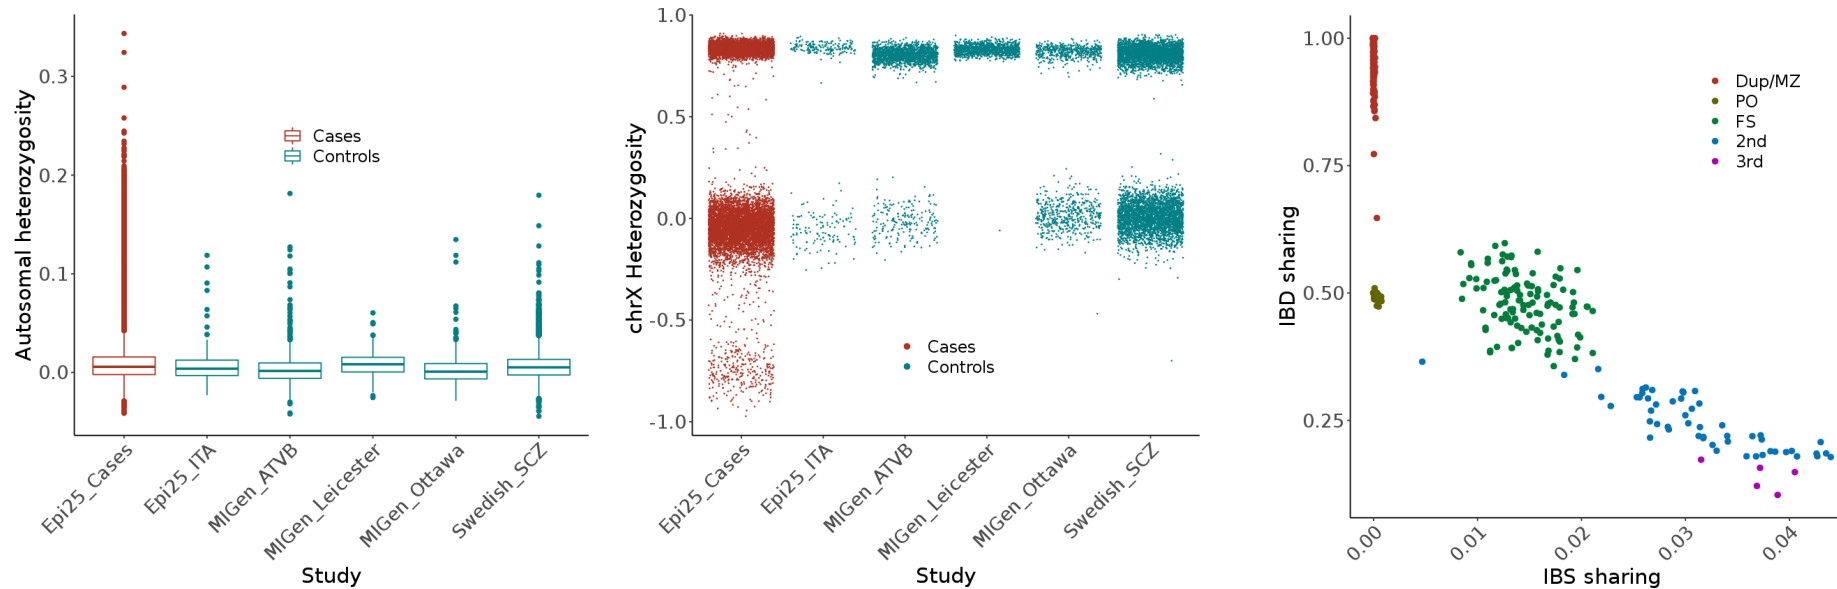

**Figure S3: Heterozygosity and kinship filtering.** A set of common, pruned variants with high genotyping rate was used to calculate the F-statistic in autosomes (left) and chrX (center) using PLINK. Samples with low or excess autosomal heterozygosity ( $> 3$  standard deviations) were filtered. For sex prediction (SNP-sex), cut-offs of 0.2 and 0.6 were used to separate female and male clusters from samples with ambiguous sequencing sex prediction. Integrated kinship predictions (right) using KING identified pairs of duplicates/twins and related samples. One sample from each pair was filtered. IBD: Identity by descent. IBS: identity by state. Dup/MZ: duplicates or monozygotic twins. PO: parent-offspring. FS: full-sibling. 2<sup>nd</sup>: second degree. 3<sup>rd</sup>: third degree.



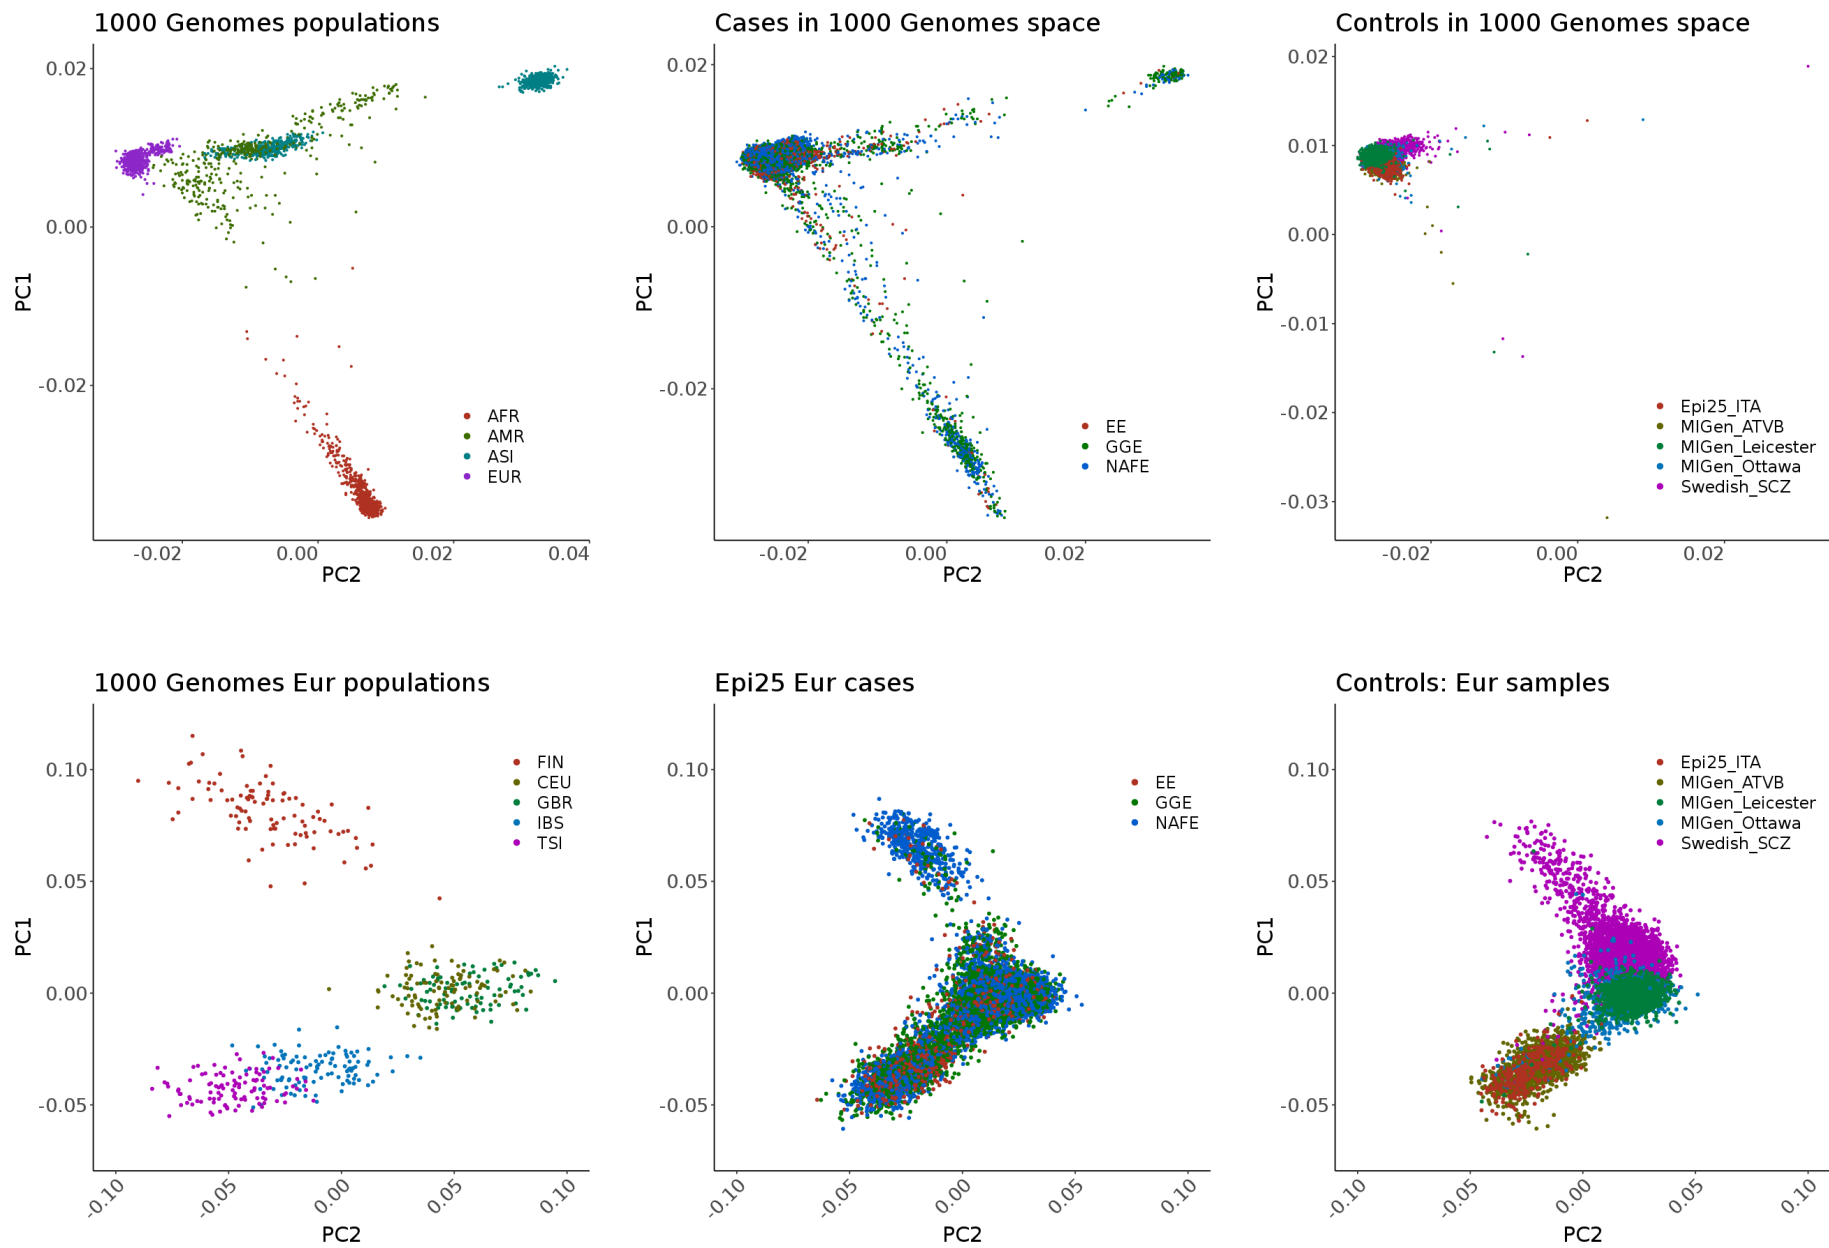

**Figure S4: Continental ancestry groups.** KING multidimensional scaling (MDS) projection in the 1000 Genomes space (top left panel) was used to estimate the major ancestry components. The cases (top center panel) showed wide variability in continental ancestry. The controls (top right panel) were mostly of European ancestry. A support vector machine was trained on 1000 Genomes sample labels and used to identify Epi25 and control samples with likely European ancestry (bottom center and right panels). A second round of MDS was performed to project the principal components of 500 samples of European ancestry from the 1000 Genomes (bottom left) on the Epi25 cases and control samples classified as European (bottom middle and right panel). See Figure S4 for subsequent case-control matching.

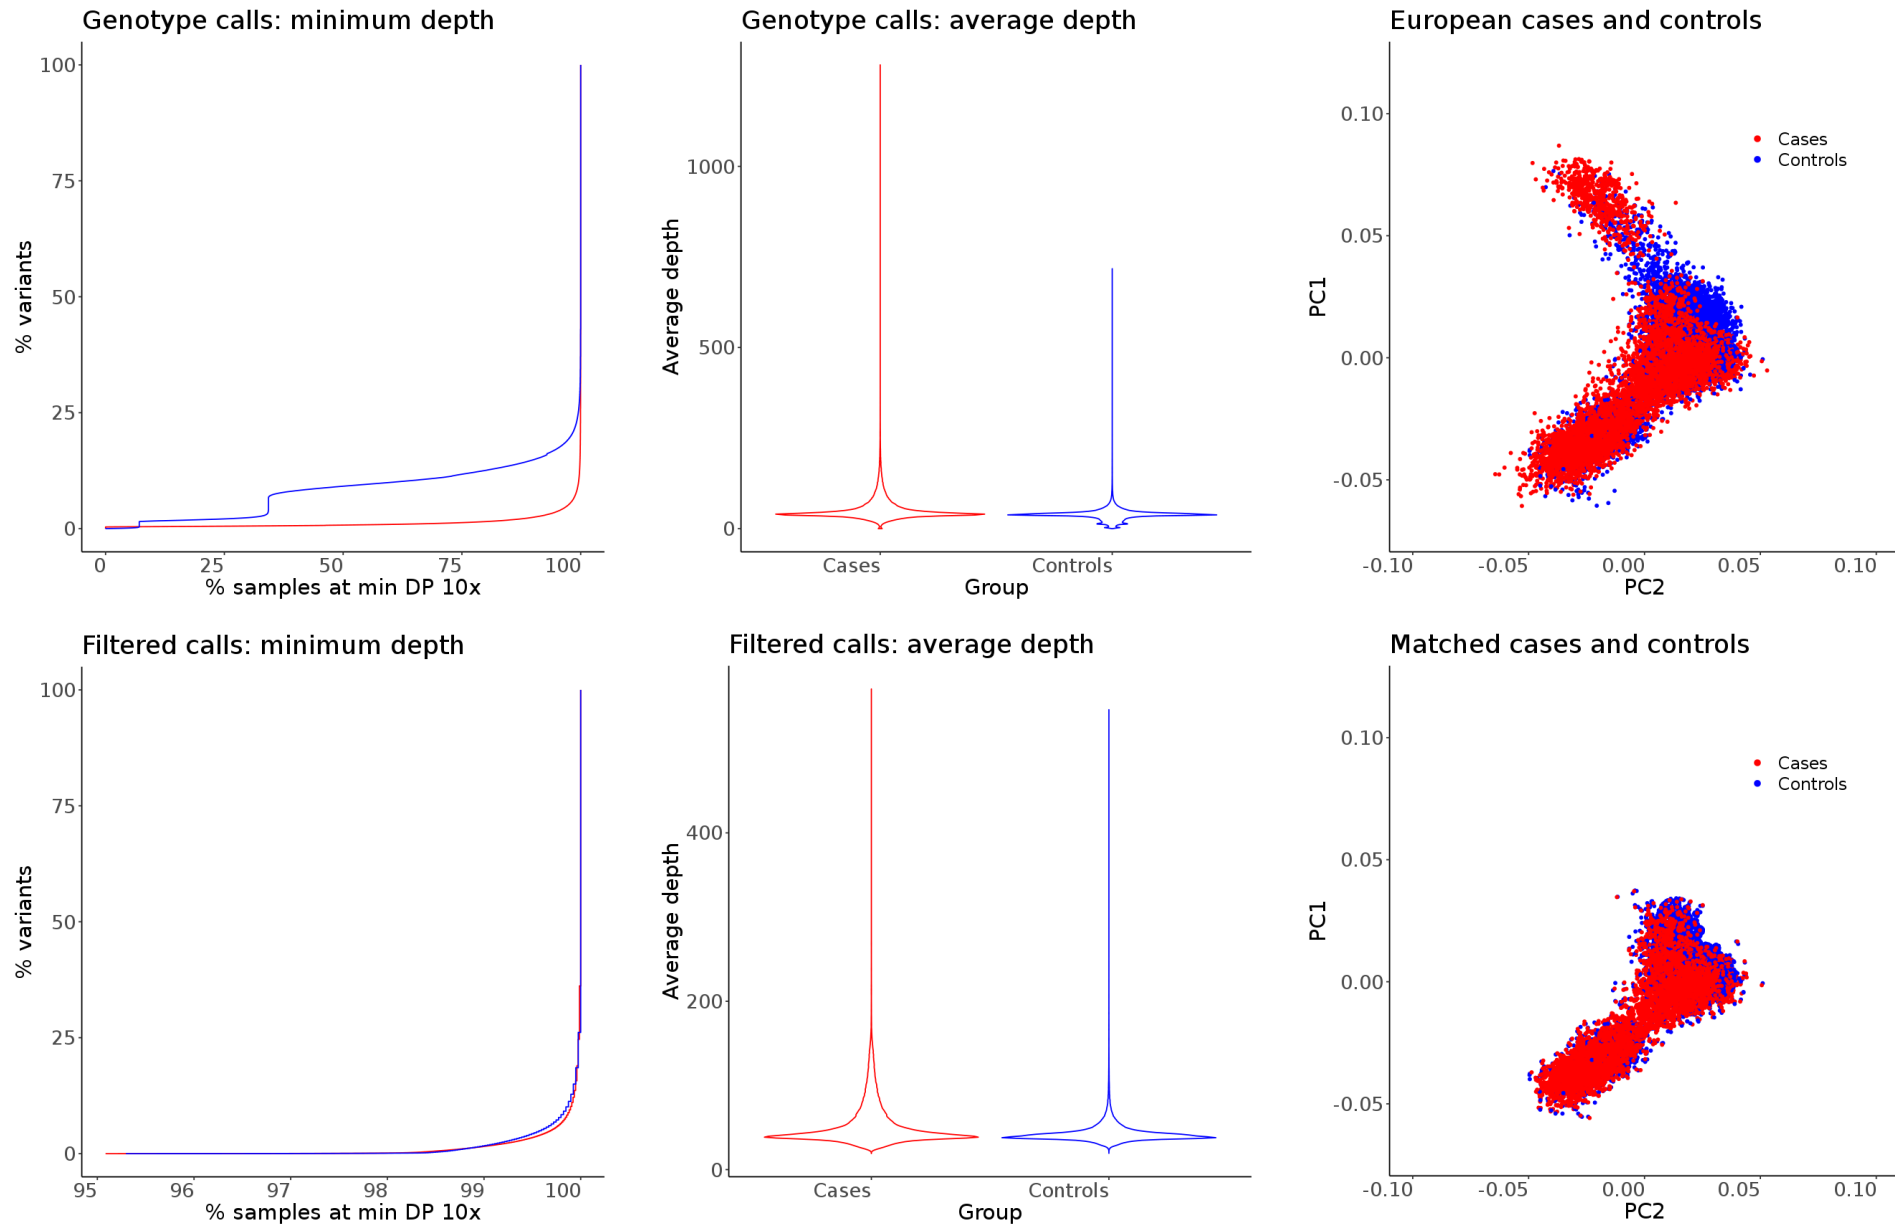

**Figure S5: Baseline case-control matching and variant harmonization.** The percent of samples covered at a minimum depth of 10x (top left) and the average depth (top center) are shown for the cases (red) and controls (blue). Multidimensional scaling was used to estimate the major ancestral components (top-right; see Figure S3 for details). To harmonize the ancestry and the variant calls, (a) about 20% of variants were removed where the percent of covered cases and controls was lower than 95%; (b) the difference in the average depth in cases and controls was calculated and outliers ( $> 3$  standard deviations) were pruned out; (c) the difference in the percent of samples covered at depth 10x was calculated and variants with extreme differences ( $> 3$  standard deviations) were also pruned; and (d) Poorly matched cases and controls on the top principal components PC1/PC2 and those of likely Finnish ancestry ( $PC1 > 0.04$ ; see Figure S3) were removed. This resulted in a homogeneous variant call rate (plots in bottom panels).

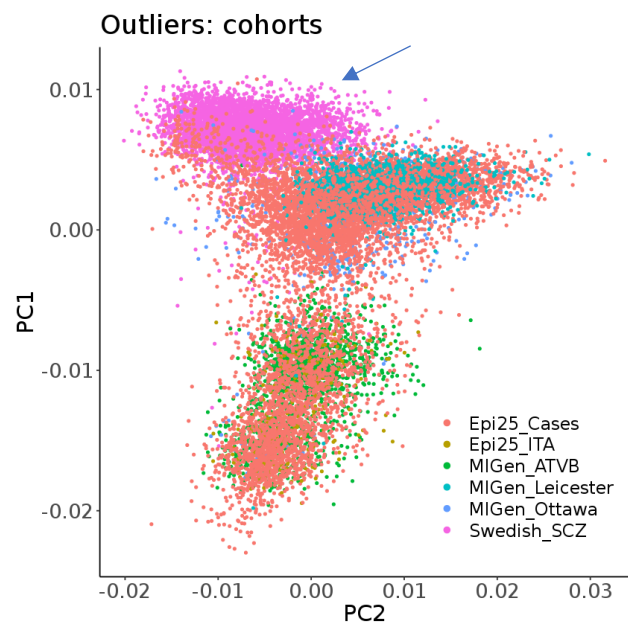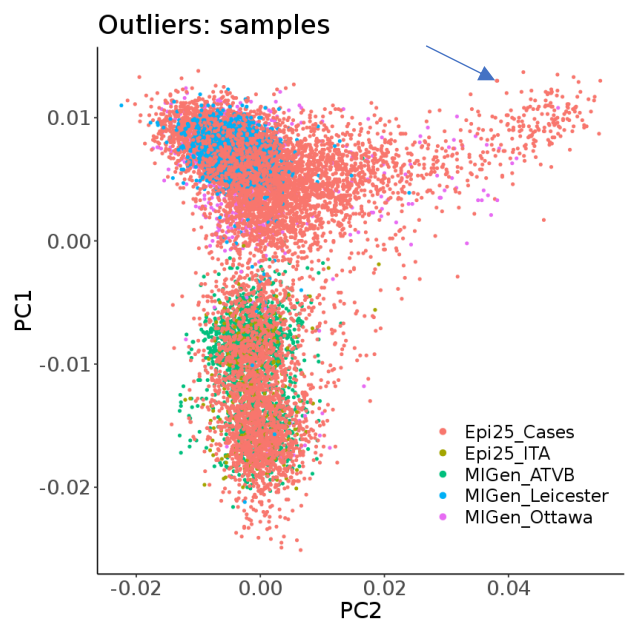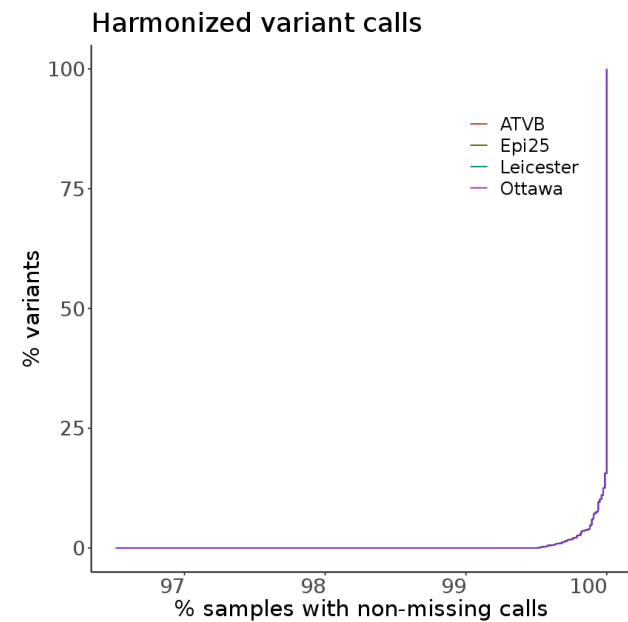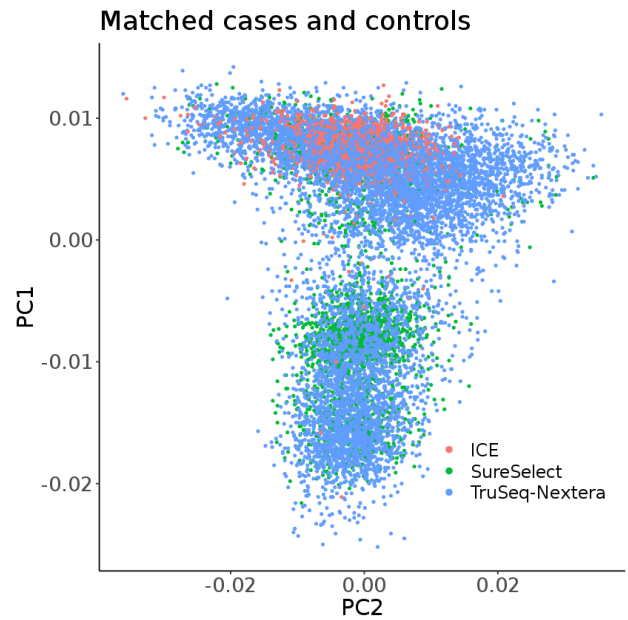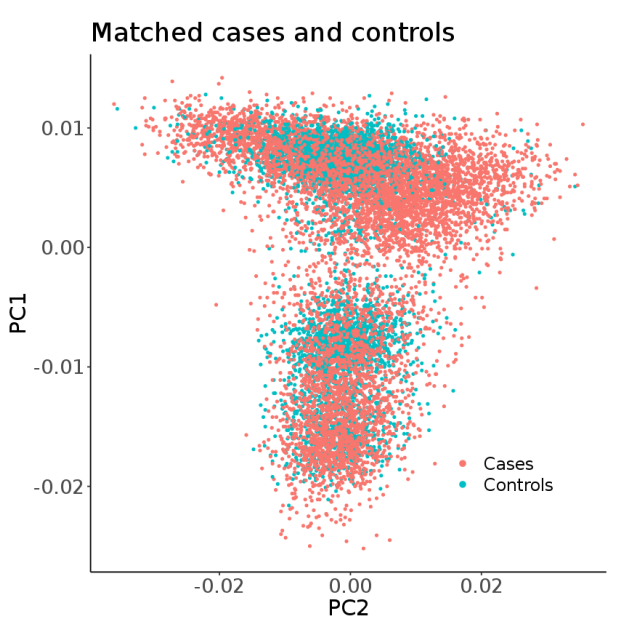

**Figure S6: Final case-control matching.** Principal component analysis of baseline-filtered cases and controls showed residual population and cohort stratification (top left). Swedish controls (outliers on the first round of PCA; arrow in top left panel) and additional poorly matched samples (outliers on the second round of PCA; arrow in top center panel) were filtered. The call-rate was harmonized between different sequencing cohorts (top right) by removing all variants where the difference in call rate between pairs of individual cohorts exceeds 0.5%. These measures minimized the patch effects (bottom left). The first and second principal components of the final matched case control set (bottom center panel) capture the northern-southern and eastern-western European geographical axis, respectively

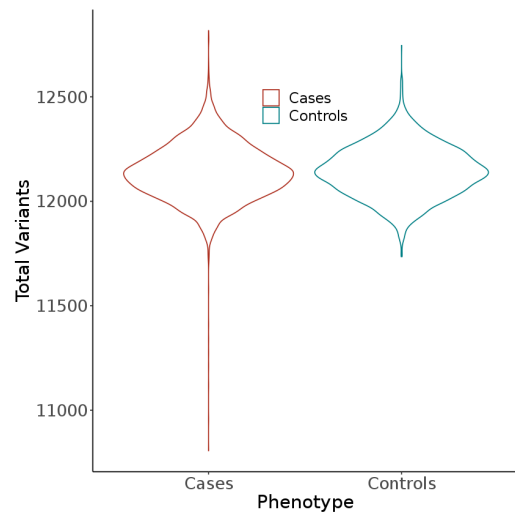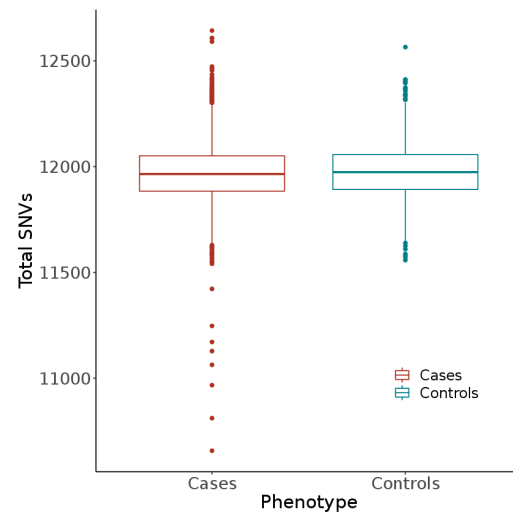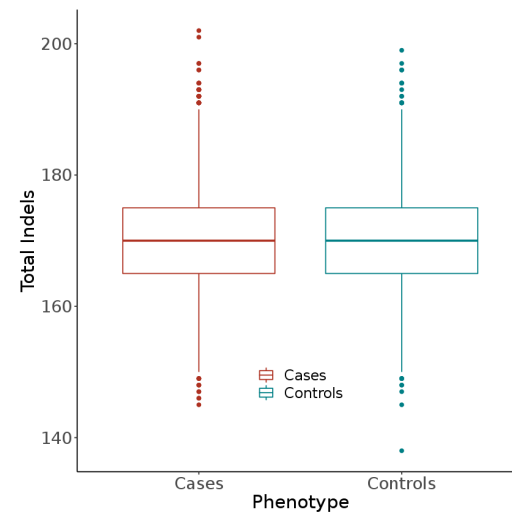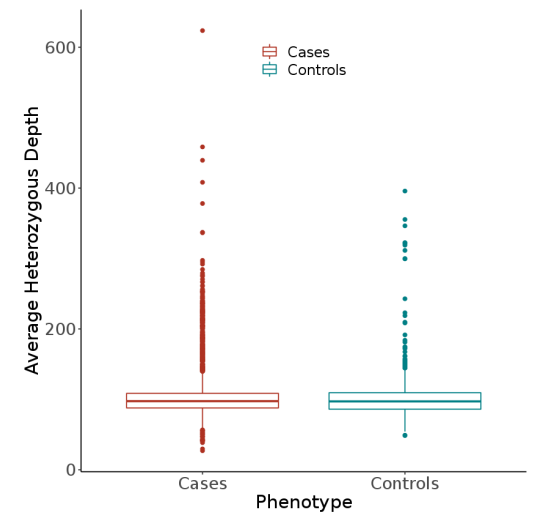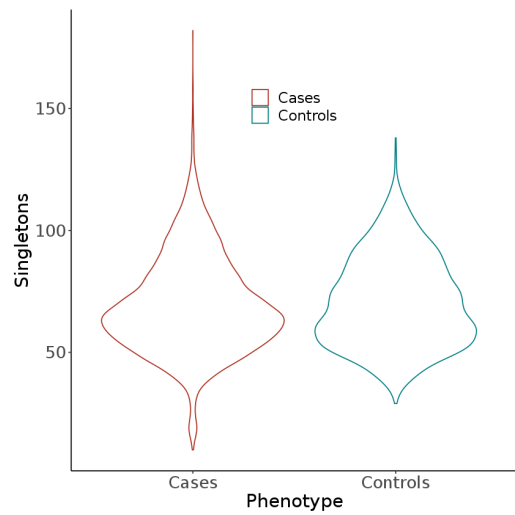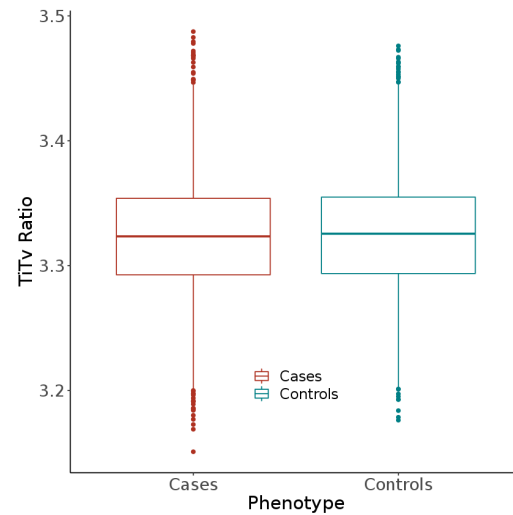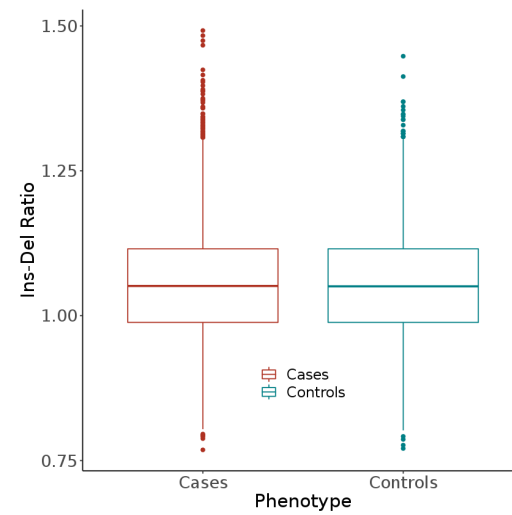

**Figure S7: Variant counts and calling metrics in the final sample set.**

**A. Variant calling metrics stratified by phenotype.** The sample and variant homogenization steps resulted the removal of half of the raw variant calls in coding regions (see Figure S1 for comparison) but also in a balanced SNP and Indel variant count distribution between the cases and controls. The residual difference in singletons count mirrors the European ancestry clusters seen in Figure S5. SNVs: single nucleotide variations. Indels: insertions and deletions. TiTv: transitions-transversions. Ins-Del: insertions-deletions.

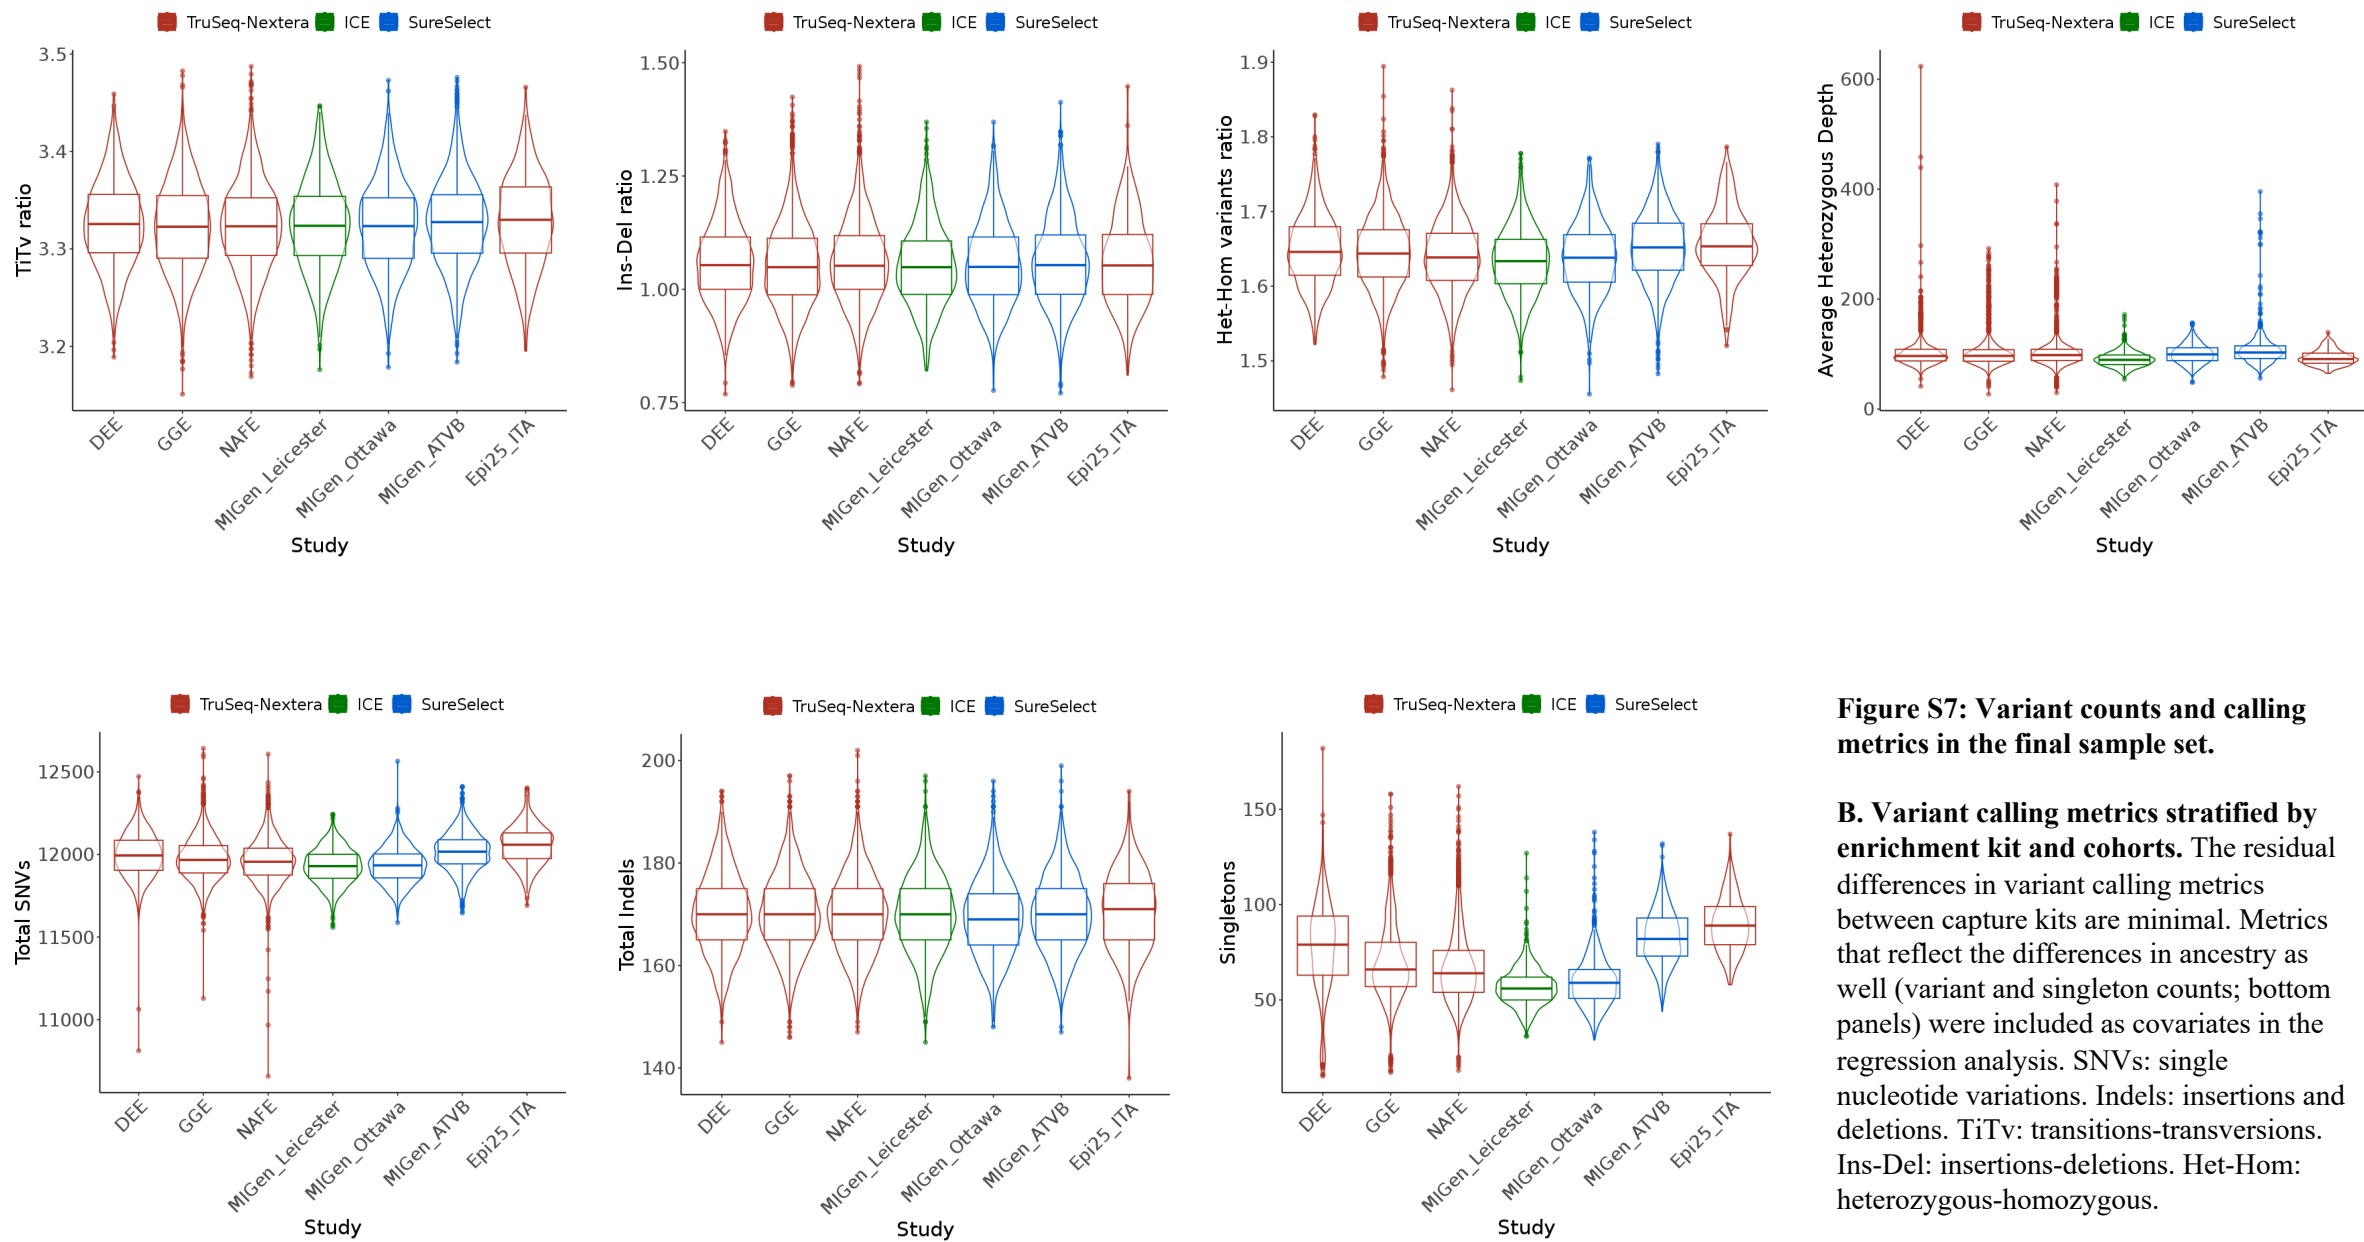

**Figure S7: Variant counts and calling metrics in the final sample set.**

**B. Variant calling metrics stratified by enrichment kit and cohorts.** The residual differences in variant calling metrics between capture kits are minimal. Metrics that reflect the differences in ancestry as well (variant and singleton counts; bottom panels) were included as covariates in the regression analysis. SNVs: single nucleotide variations. Indels: insertions and deletions. TiTv: transitions-transversions. Ins-Del: insertions-deletions. Het-Hom: heterozygous-homozygous.

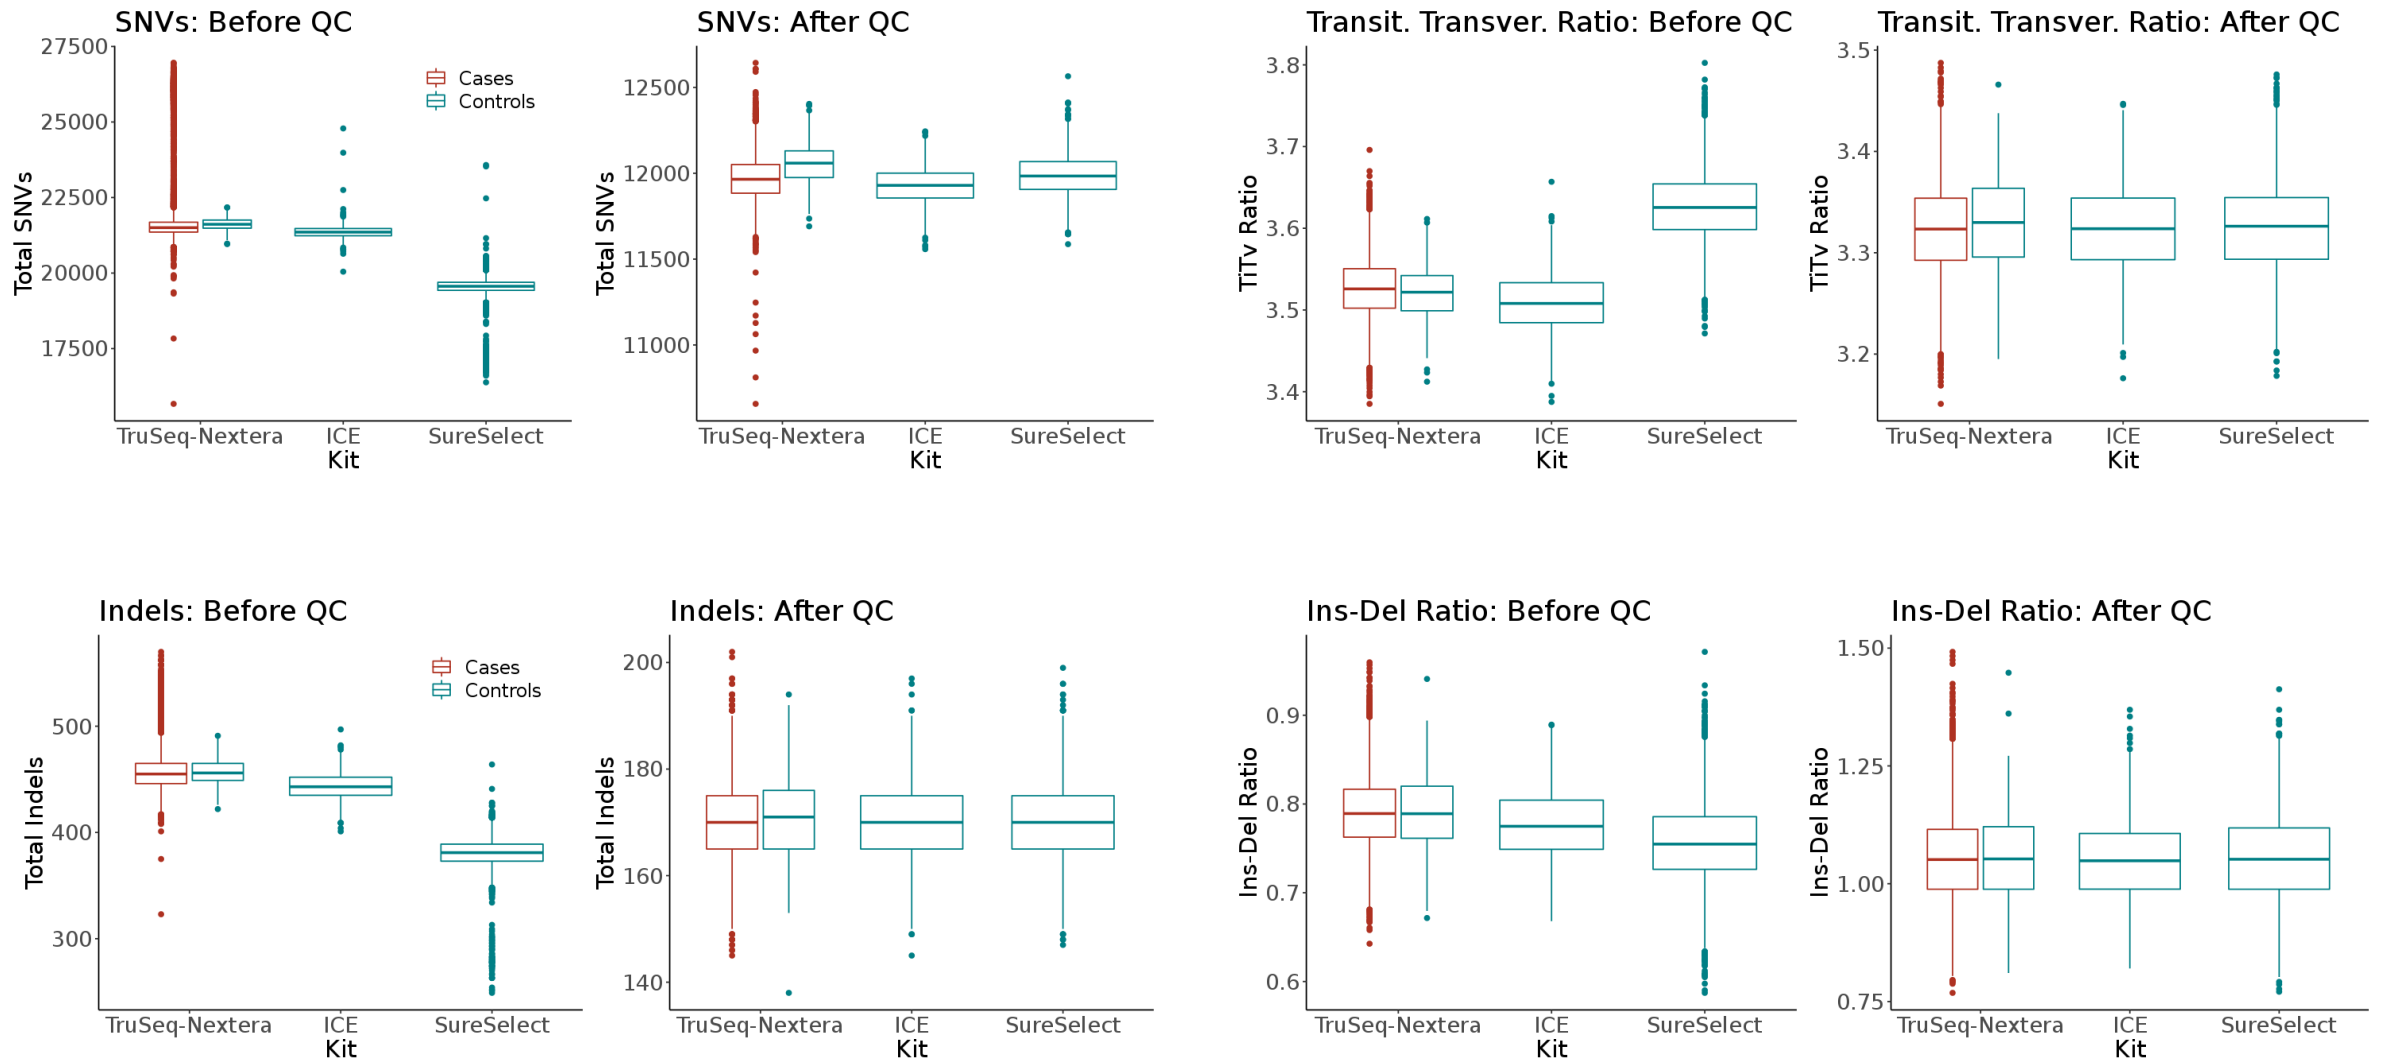

**Figure S7: Variant counts and calling metrics in the final sample set. C. Outcomes of coverage harmonization.** Quality control and coverage harmonization processes ensured inclusion of variants with adequate coverage across capture kits, eventually minimizing the possibility of spurious outcomes from differences between capture kits.

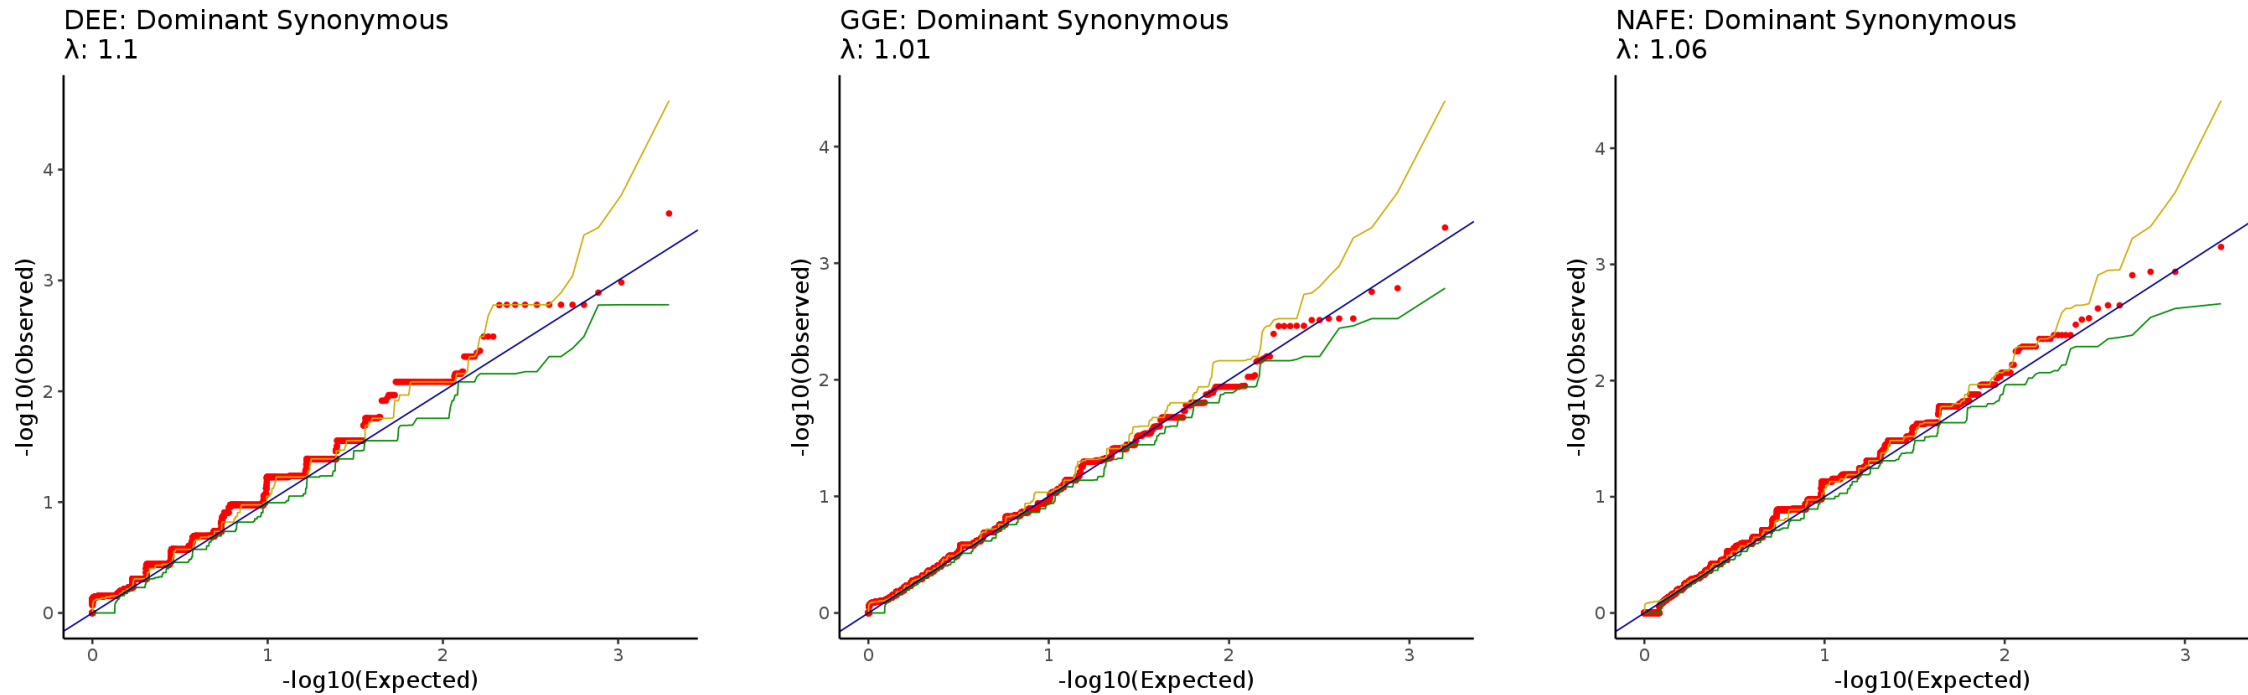

**Figure S8: Quantile-Quantile plots of gene collapsing analysis of ultra-rare synonymous variants.** Observed  $p$  values are obtained from testing the significance of the difference in qualifying and unqualifying cases and controls counts (cases and controls with or without qualifying variants) using Fisher Exact Test. Expected  $p$  values indicate the mean  $p$  values obtained from 1000 permutations of sample labels followed by Fisher Exact Test. Green and golden lines indicate 2.5<sup>th</sup> and 97.5<sup>th</sup> centiles of permutation  $p$  values. Genomic Inflation Factor estimates ( $\lambda$ ) were calculated from a comparison of the observed and mean permutation  $p$  values. DEE: developmental and epileptic encephalopathies. GGE: genetic generalized epilepsies. NAFE: non-acquired focal epilepsies.

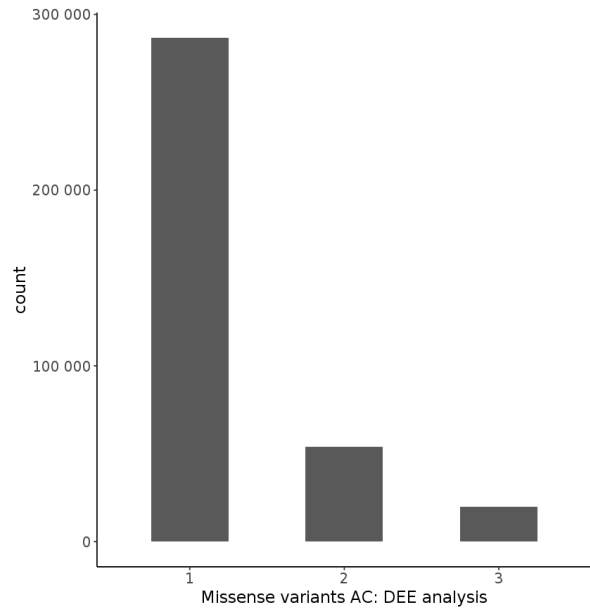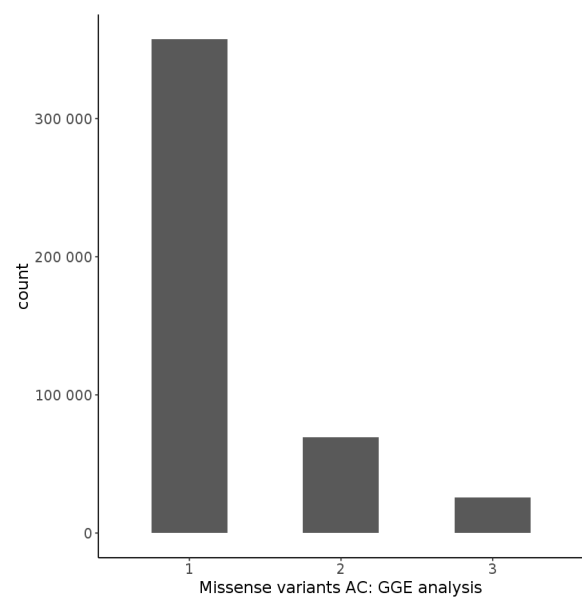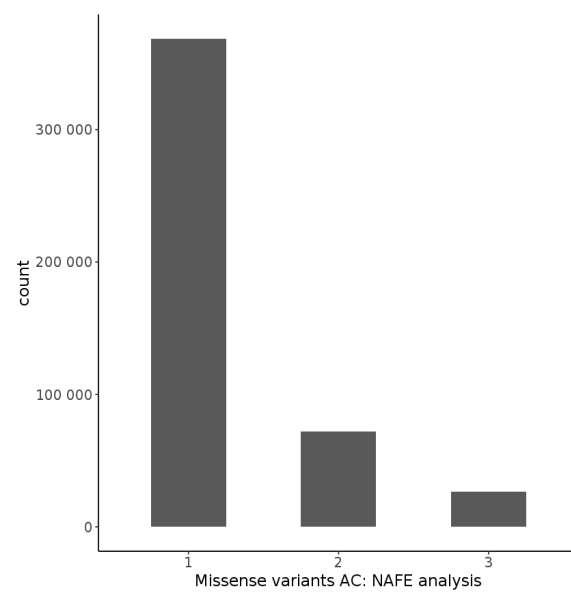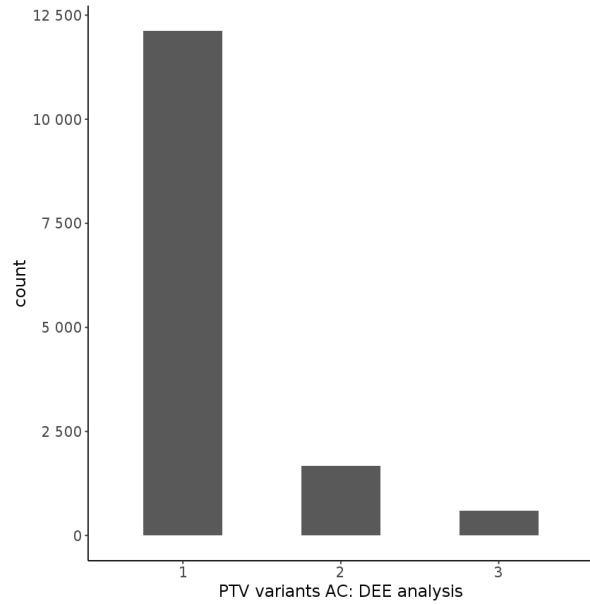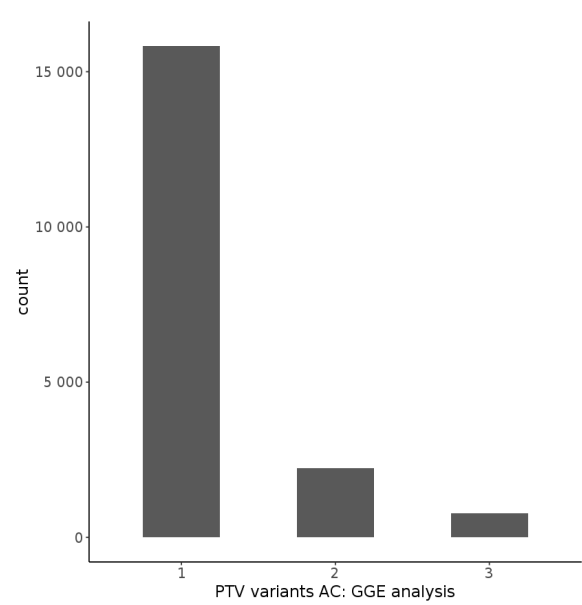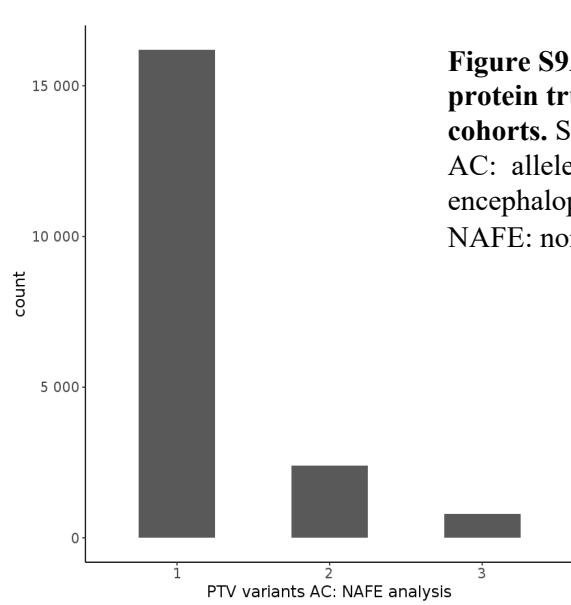

**Figure S9A: Allele counts of ultra-rare missense and protein truncating variants (PTV) observed in the study cohorts. Singleton variants constitute most observations. AC: allele count. DEE: developmental and epileptic encephalopathies. GGE: genetic generalized epilepsies. NAFE: non-acquired focal epilepsies.**



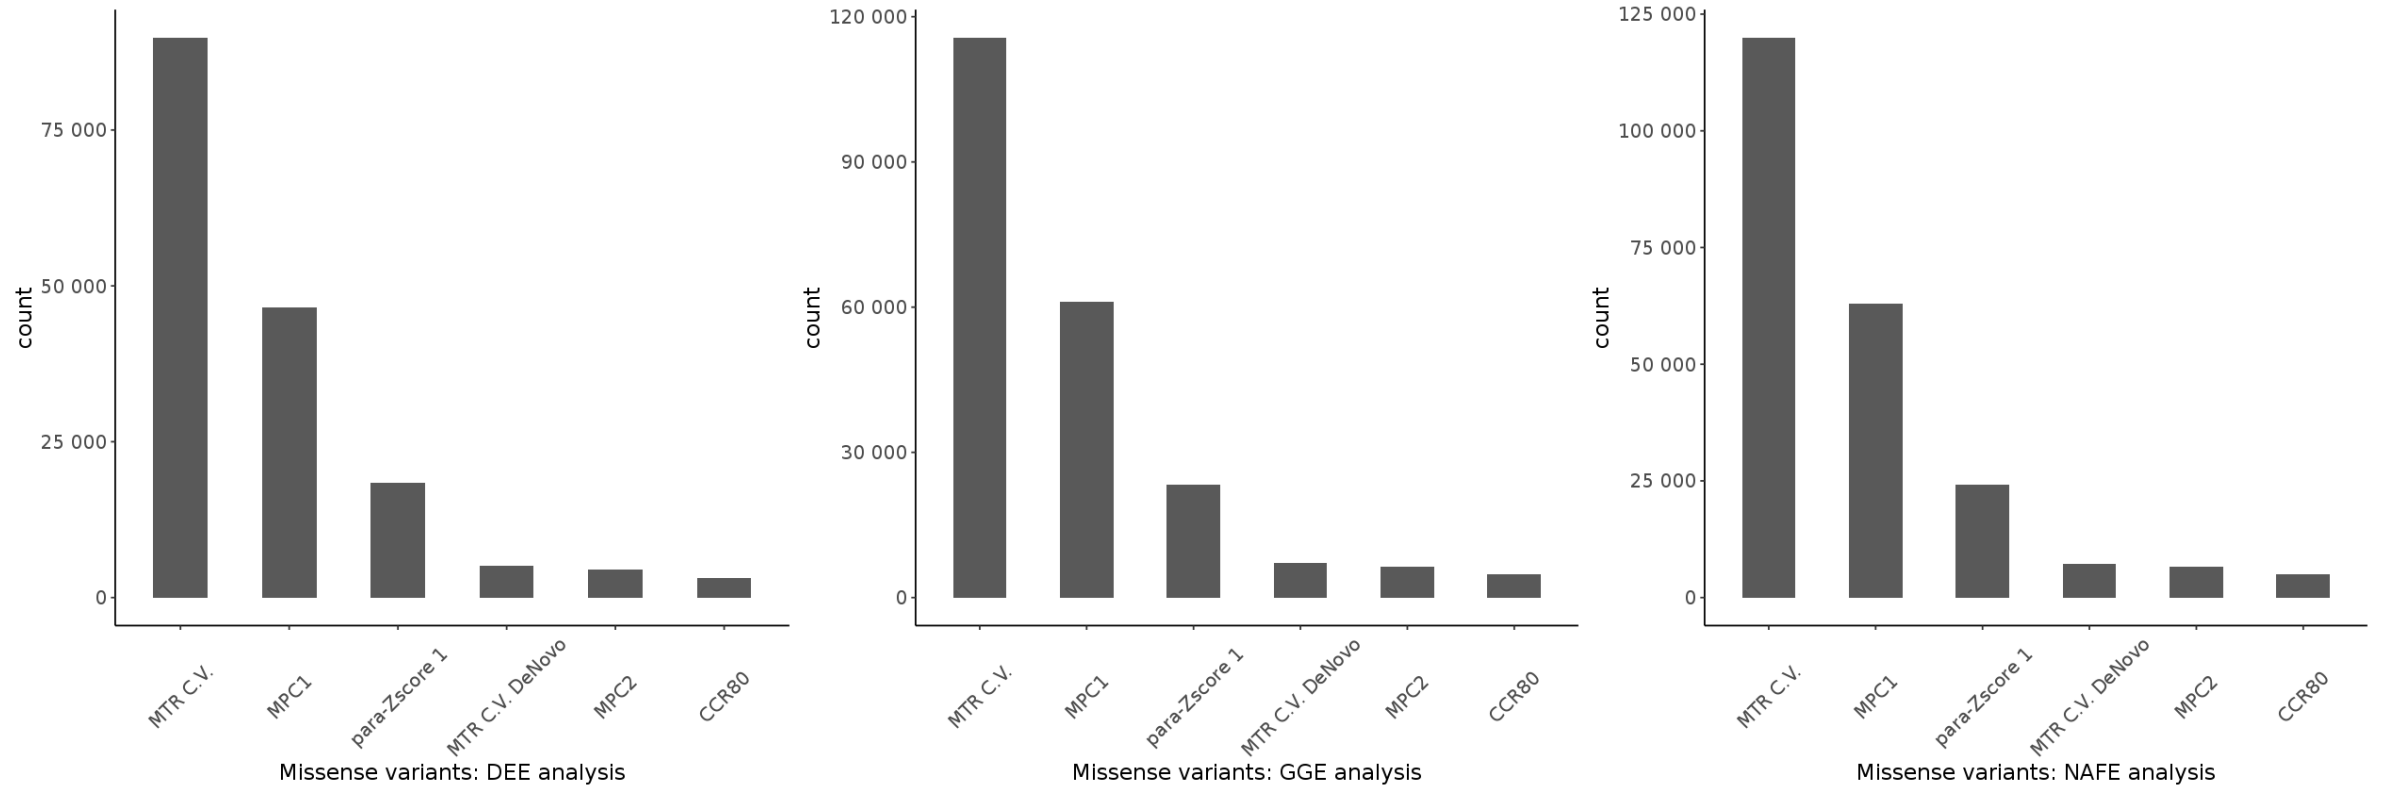

**Figure S9B: Ultra-rare variants count in selected missense variant classes.** The variants are partially overlapping between these models, particularly because the same set of controls is used. DEE: developmental and epileptic encephalopathies. GGE: genetic generalized epilepsies. NAFE: non-acquired focal epilepsies. C.V.: ClinVar.

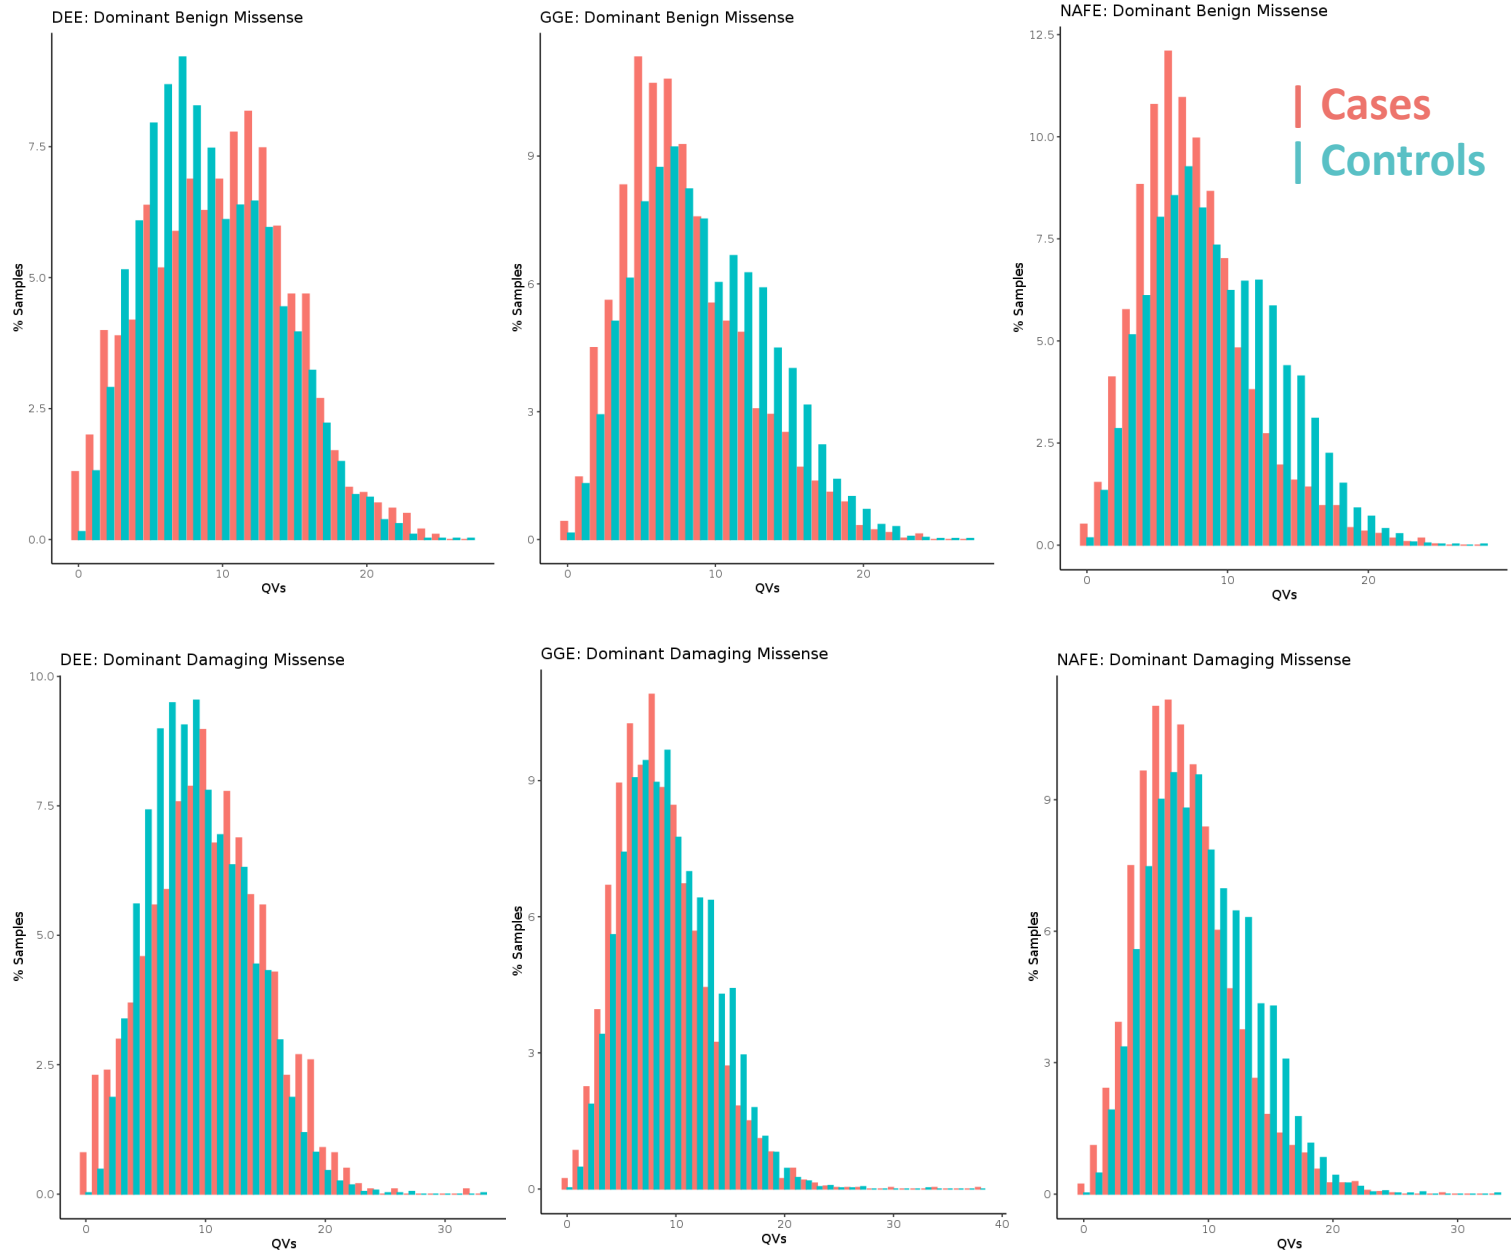

**Figure S10: Distribution of qualifying variants (QVs) in cases and controls.**

**A.** Plots from the analysis of benign (top) and damaging (bottom) missense variants are shown. DEE: developmental and epileptic encephalopathies. GGE: genetic generalized epilepsies. NAFE: non-acquired focal epilepsies.

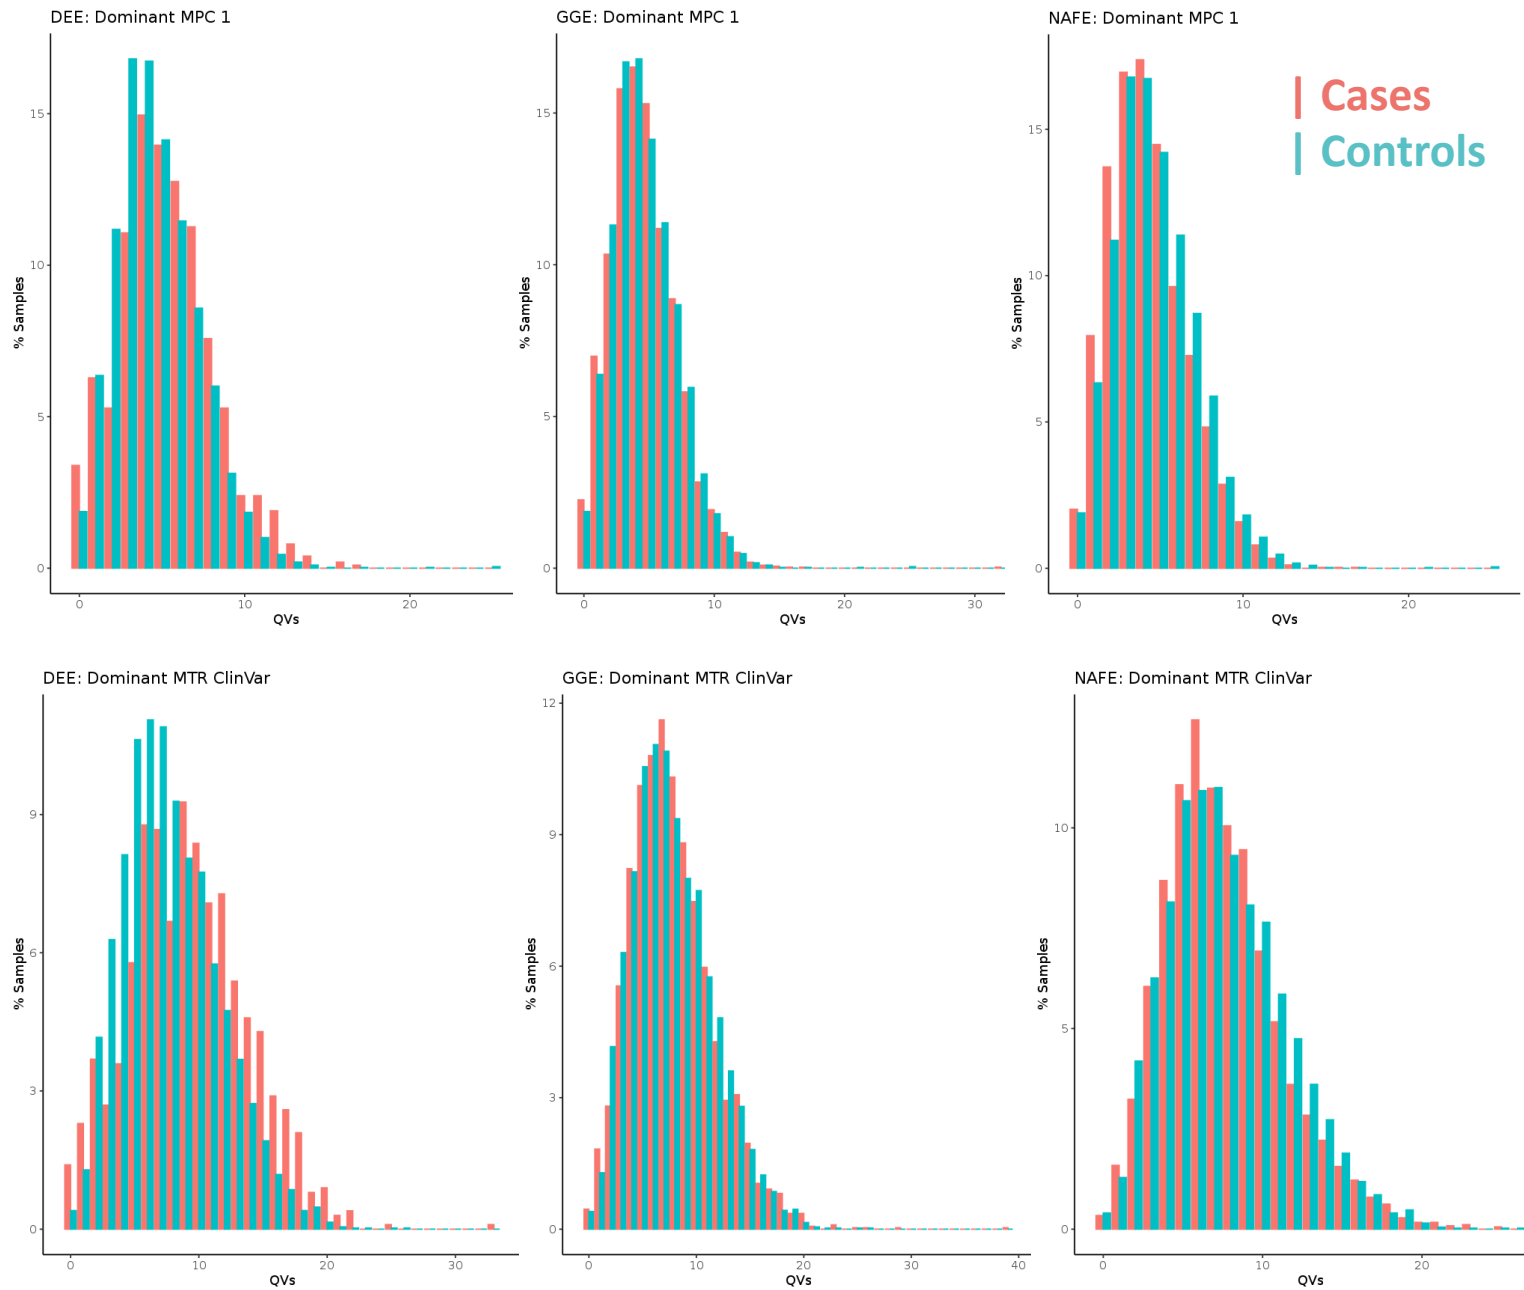

**Figure S10: Distribution of qualifying variants (QVs) in cases and controls.**

**B.** Plots from the analysis of missense variants in moderately constrained sites are shown (to: MPC 1 class, bottom: MTR ClinVar class). DEE: developmental and epileptic encephalopathies. GGE: genetic generalized epilepsies. NAFE: non-acquired focal epilepsies.

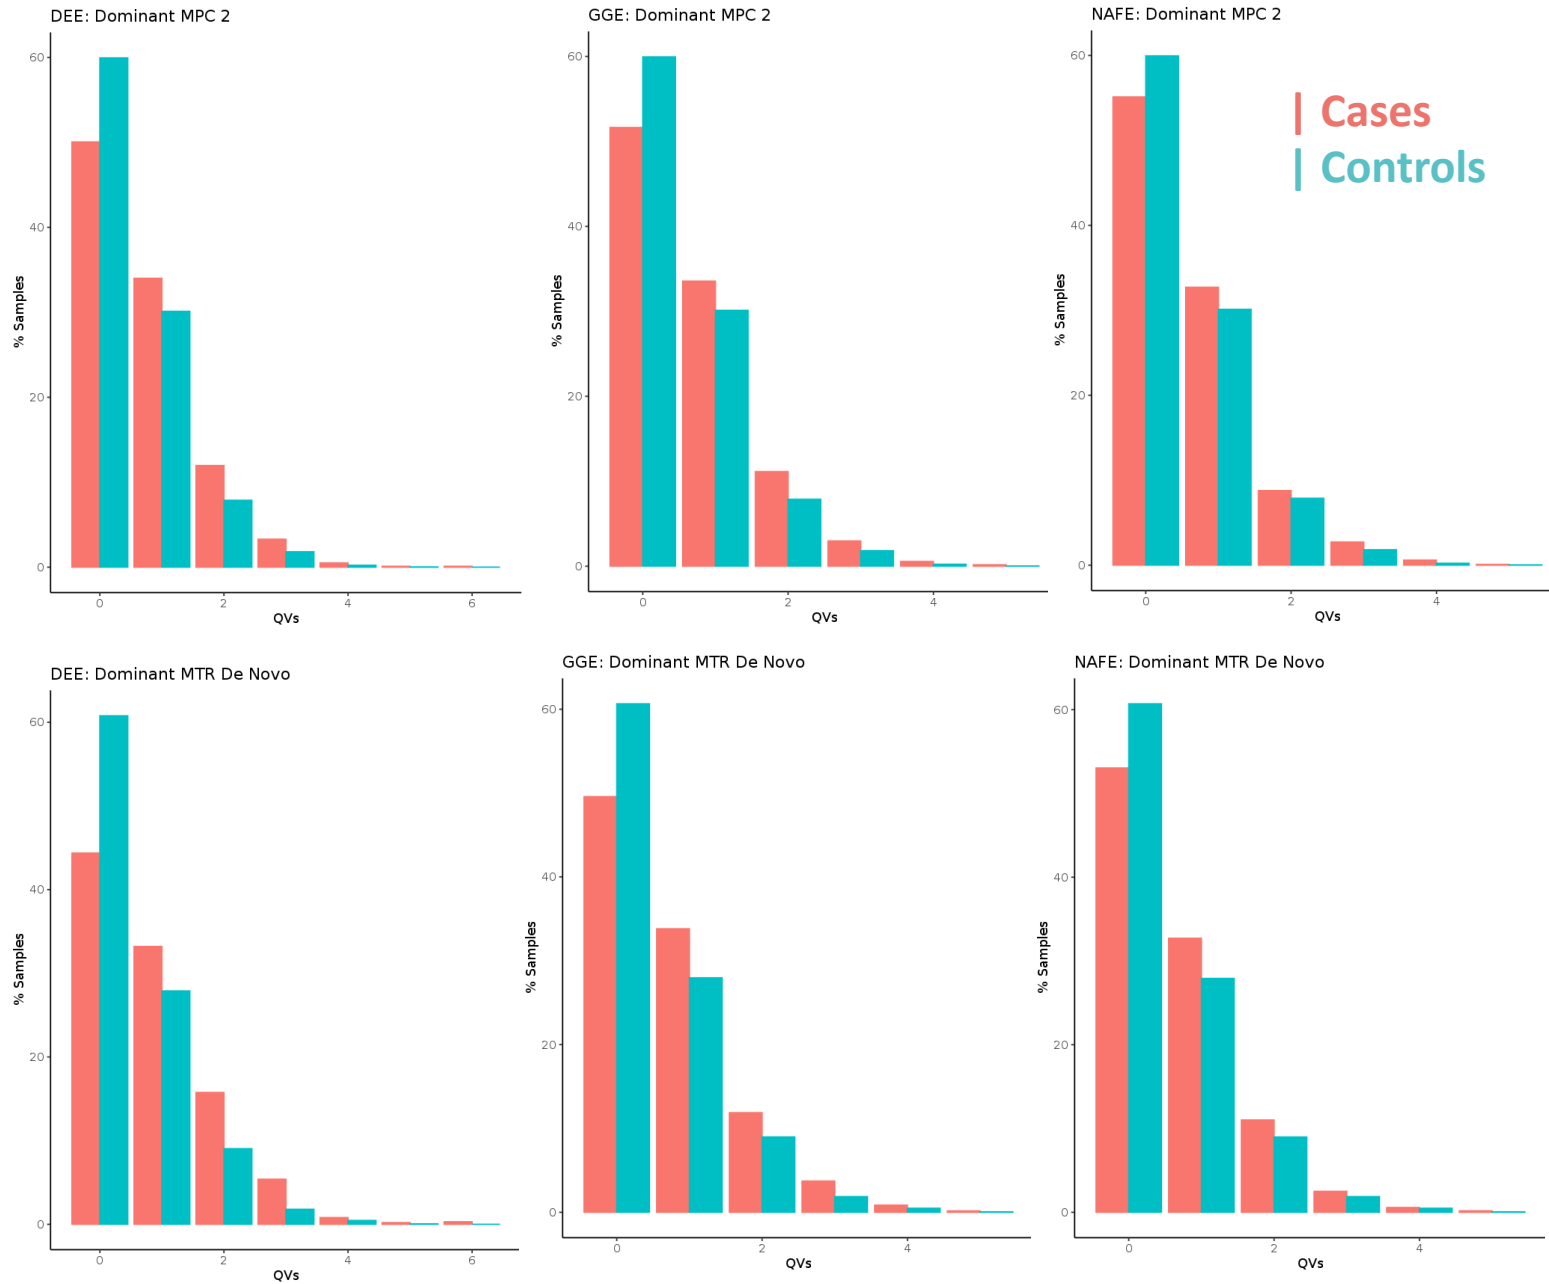

**Figure S11: Variants load in three analysis sets in missense variants affecting highly constrained regions.**

**A. Variants classified based on MPC and MTR scores.** Plots from the analysis of missense variants in highly constrained sites (top: MPC 2 class; bottom: MTR De Novo class). DEE: developmental and epileptic encephalopathies. GGE: genetic generalized epilepsies. NAFE: non-acquired focal epilepsies.

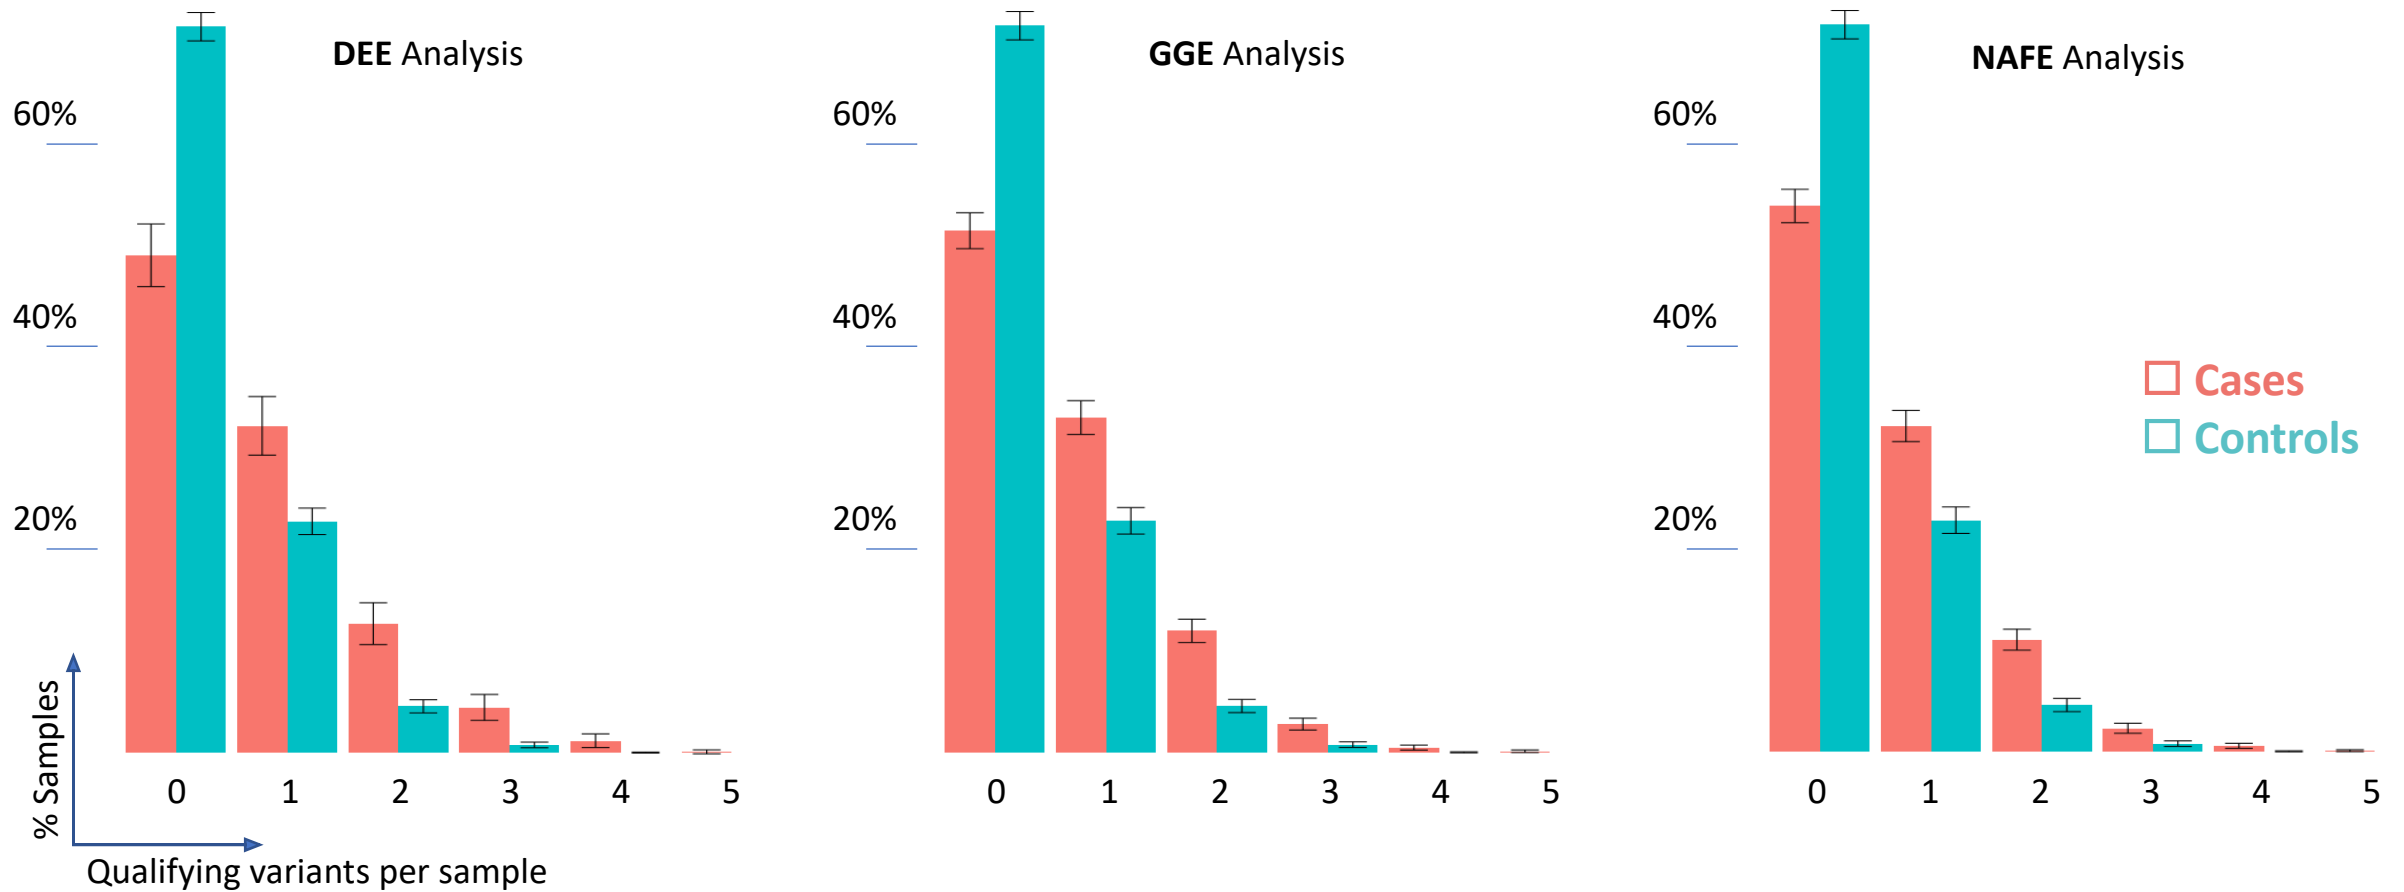

**Figure S11: Variants load in three analysis sets in missense variants affecting highly constrained regions.**

**B. CCR 80 class of variants.** Roughly, half of the cases compared to one fourth of the controls harbor one or more qualifying variant per exome in highly constrained sites. Error bars indicate the 95% confidence intervals calculated as follows:  $p \pm 1.96 \times \sqrt{p(1-p)/n}$  where  $p$  is the proportion of samples and  $n$  is the total number of samples. DEE: developmental and epileptic encephalopathies. GGE: genetic generalized epilepsies. NAFE: non-acquired focal epilepsies.

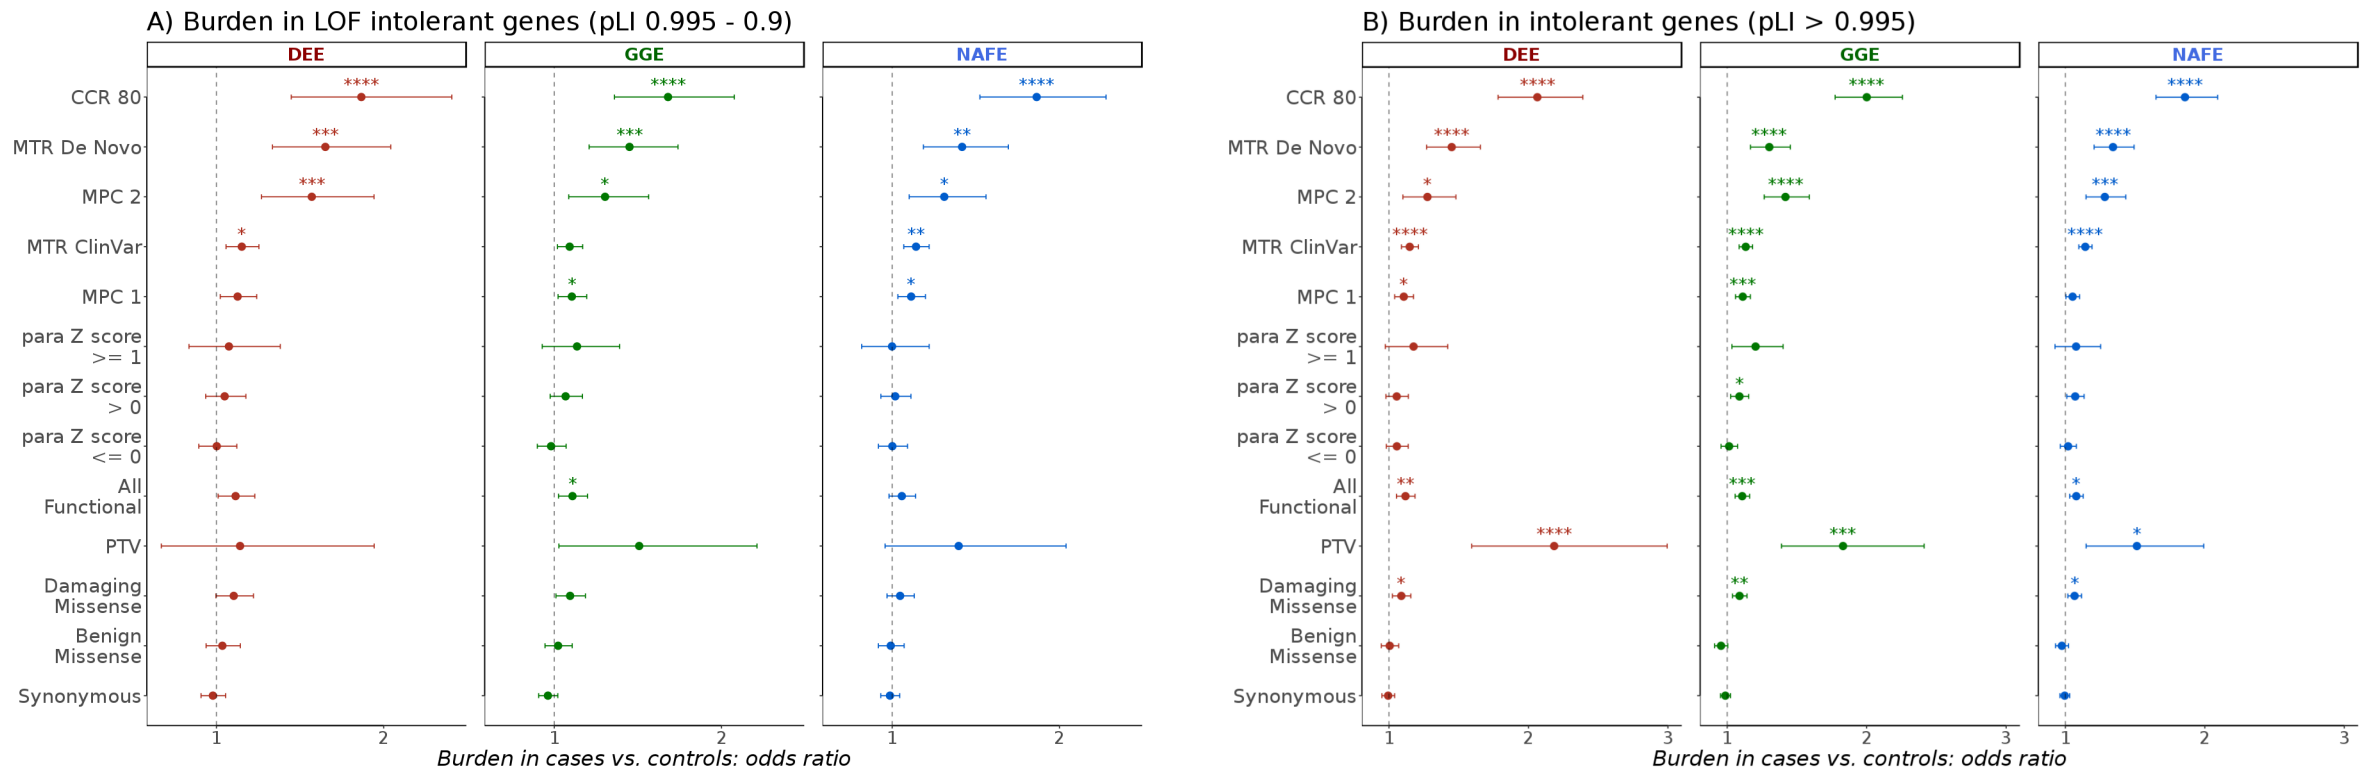

**Figure S12: Burden of ultra-rare variants in loss-of-function intolerant genes.** *y* axis: variant classes. *x* axis: odds ratio from regression analysis of individual burden of qualifying variants. Stars indicate FDR-adjusted *p* values: \* < 0.05, \*\* < 0.005, \*\*\* < 0.0005, \*\*\*\* < 0.00005. Error bars indicate 95% confidence intervals of odds. DEE: developmental and epileptic encephalopathies. GGE: genetic generalized epilepsies. NAFE: non-acquired focal epilepsies. pLI: probability of loss-of-function intolerance.

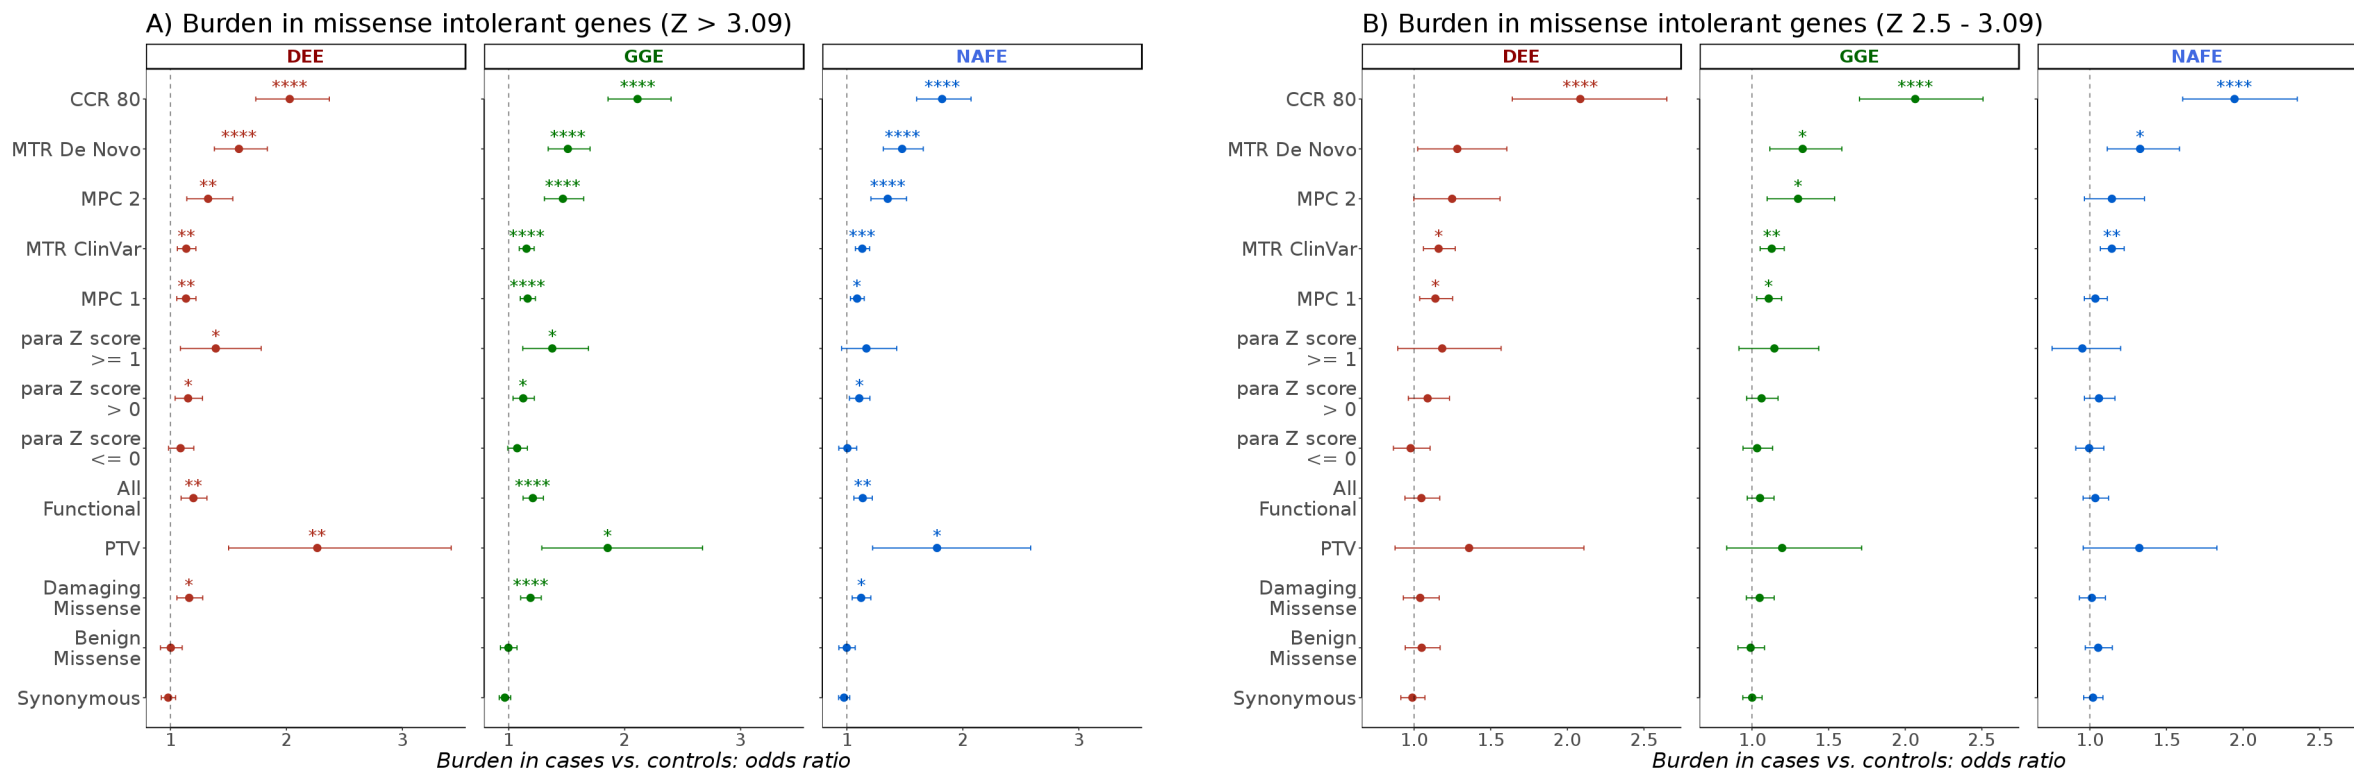

**Figure S13: Burden in brain-expressed missense intolerant genes.** y axis: variant classes. x axis: odds ratio from regression analysis of individual burden of qualifying variants. Stars indicate FDR-adjusted  $p$  values: \* < 0.05, \*\* < 0.005, \*\*\* < 0.0005, \*\*\*\* < 0.00005. Error bars indicate 95% confidence intervals of odds. DEE: developmental and epileptic encephalopathies. GGE: genetic generalized epilepsies. NAFE: non-acquired focal epilepsies. Z: z-score of the probability of missense intolerance.

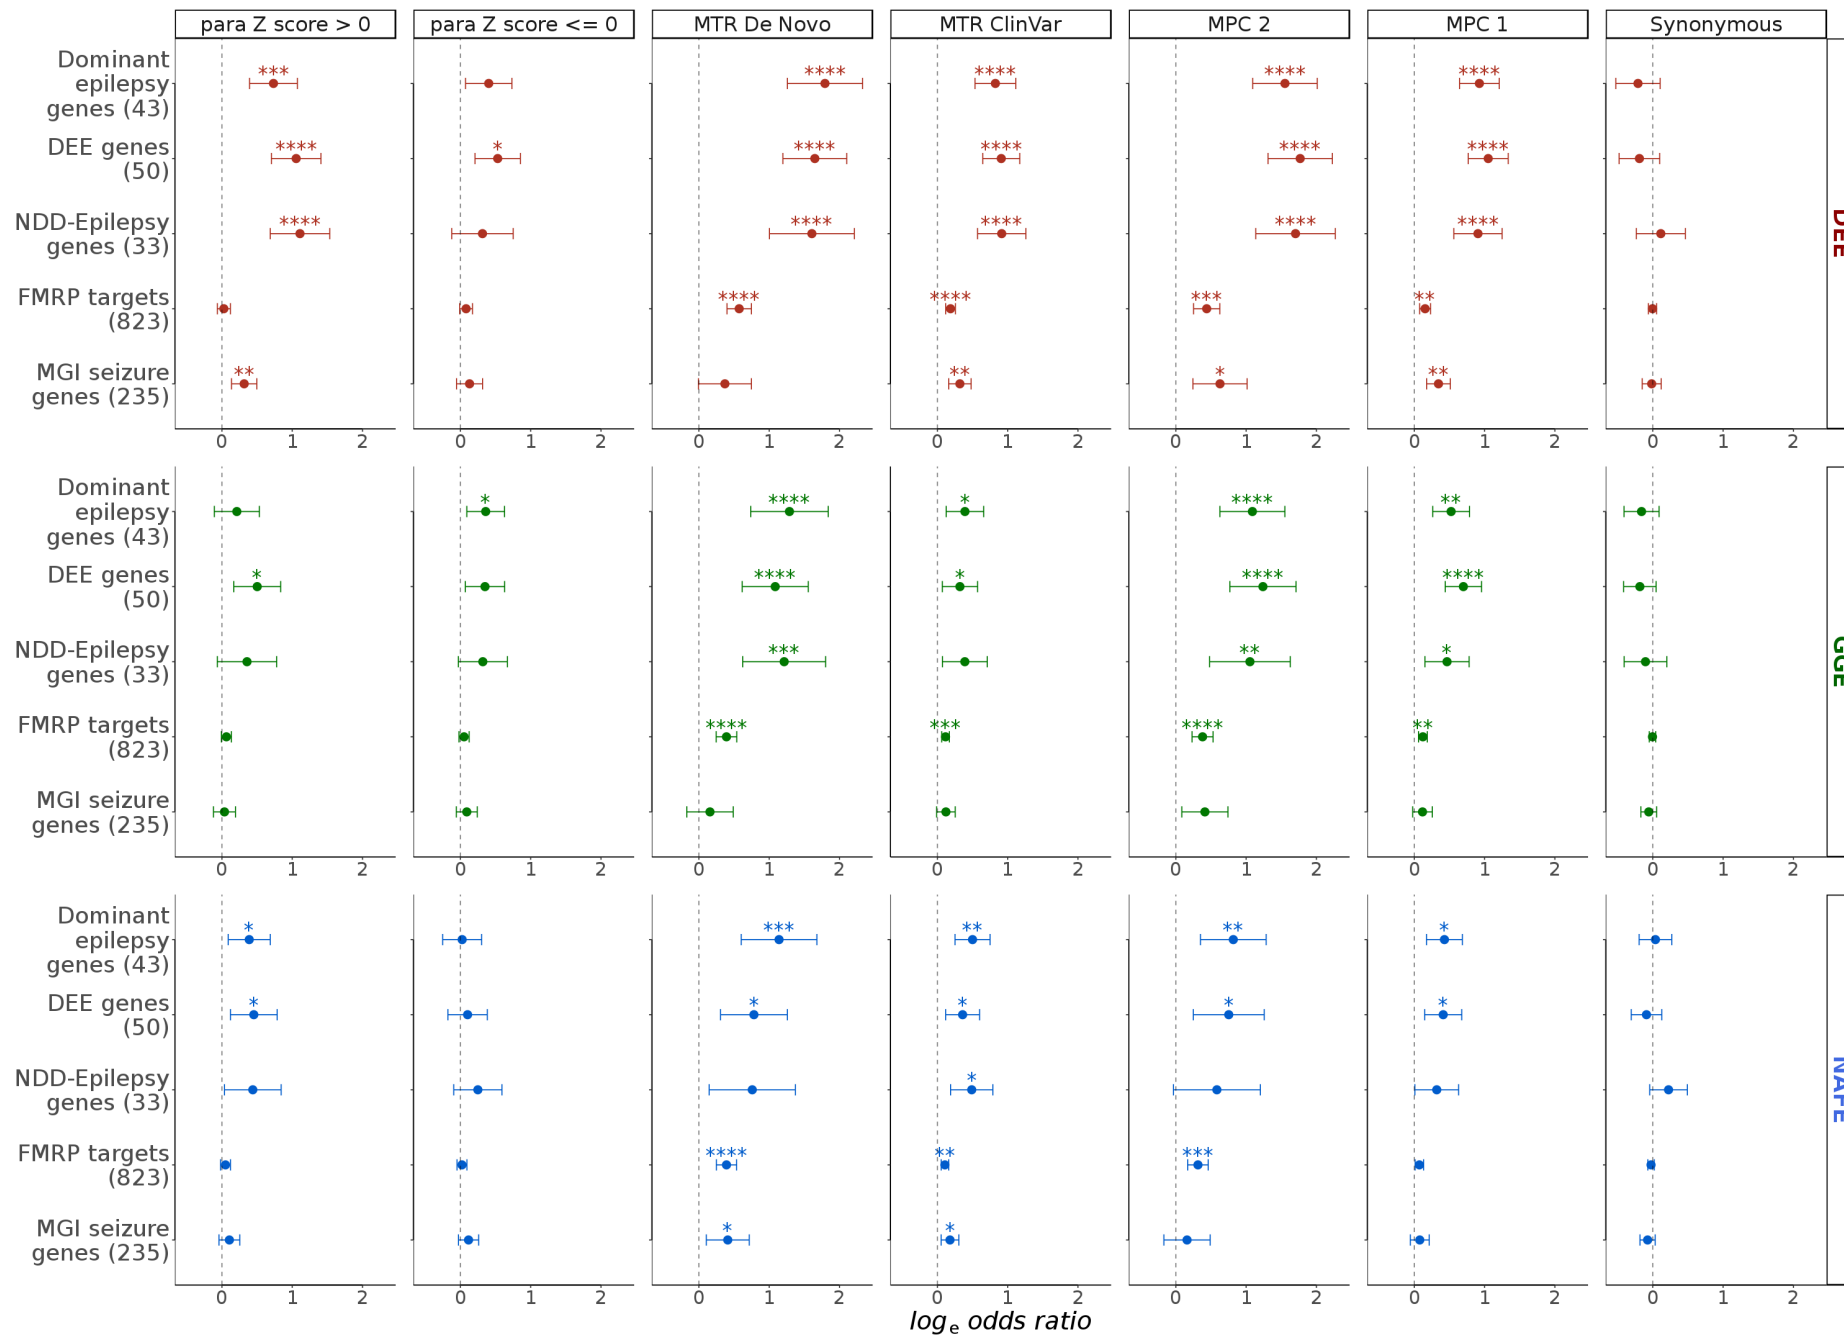

**Figure S14: Burden of ultra-rare variants in groups of epilepsy-related known disease genes.** The burden in five gene-sets (y-axis; number of genes between brackets) in developmental and epileptic encephalopathies (DEE), genetic generalized epilepsies (GGE) and non-acquired focal epilepsies (NAFE) (horizontal panel) in selected variant classes (vertical panels) is shown on the x-axis (log odd ratios from Likelihood Ratio Test; error bars indicate 95% confidence intervals). False-Discovery-Rate-adjusted  $p$  values (synonymous variants analysis  $p$  values were not adjusted) are indicated with stars as follows: no star > 0.05, \* < 0.05, \*\* < 0.005, \*\*\* < 0.0005, \*\*\*\* < 0.00005. NDD-Epilepsy: neurodevelopmental disorders with epilepsy. FMRP: Fragile-X Mental Retardation Protein targets. MGI: Mouse Genome Informatics database.



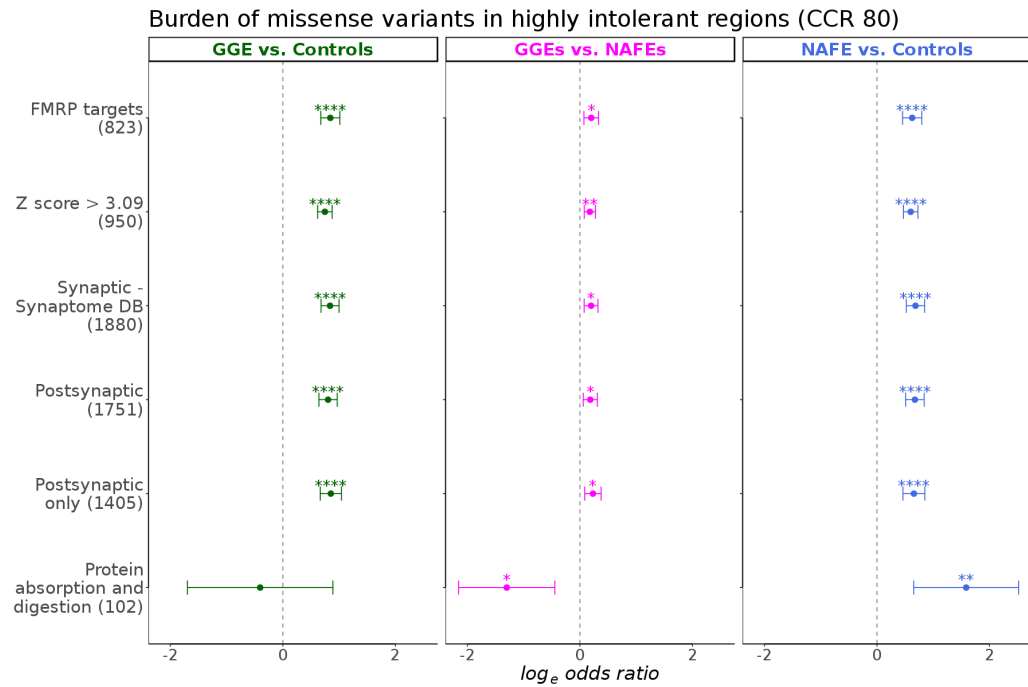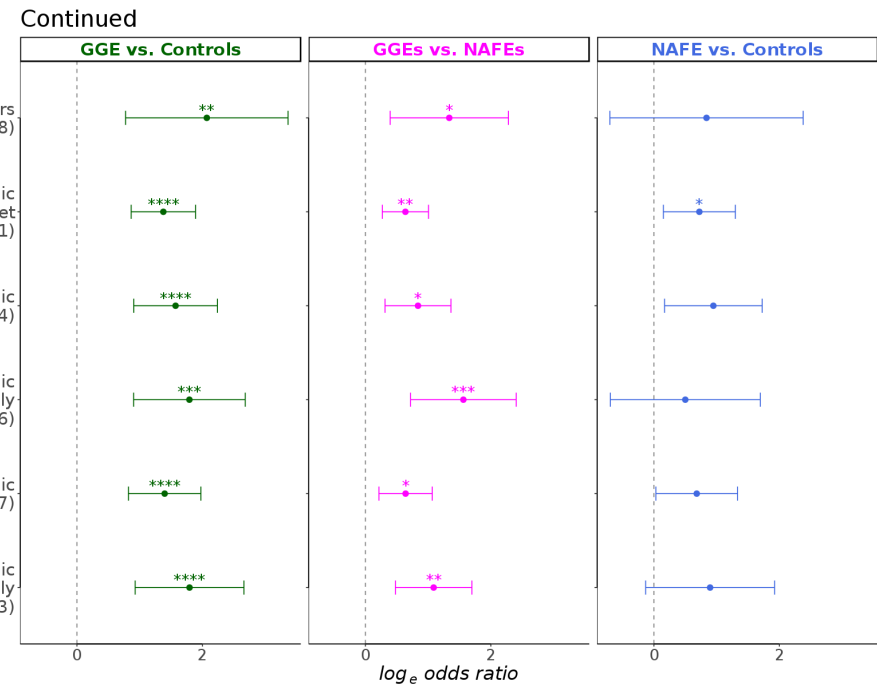

**Figure S15: Gene sets with substantial differences in URVs burden in a direct comparison of GGEs vs. NAFEs.** All gene sets with  $p$  values  $< 0.01$  (corresponds to an FDR-adjusted  $p$  value of 0.05 in the primary analysis) are shown. Panels: variant classes.  $y$  axis: gene-sets (genes count between parenthesis).  $x$  axis: log odds ratio from regression analysis of individual burden of qualifying variants. Stars indicate FDR-adjusted  $p$  values: \*  $< 0.05$ , \*\*  $< 0.005$ , \*\*\*  $< 0.0005$ , \*\*\*\*  $< 0.00005$ . Error bars indicate 95% confidence intervals of odds. GGE: genetic generalized epilepsies. NAFE: non-acquired focal epilepsies.

### Synaptic and axon initial segment genes

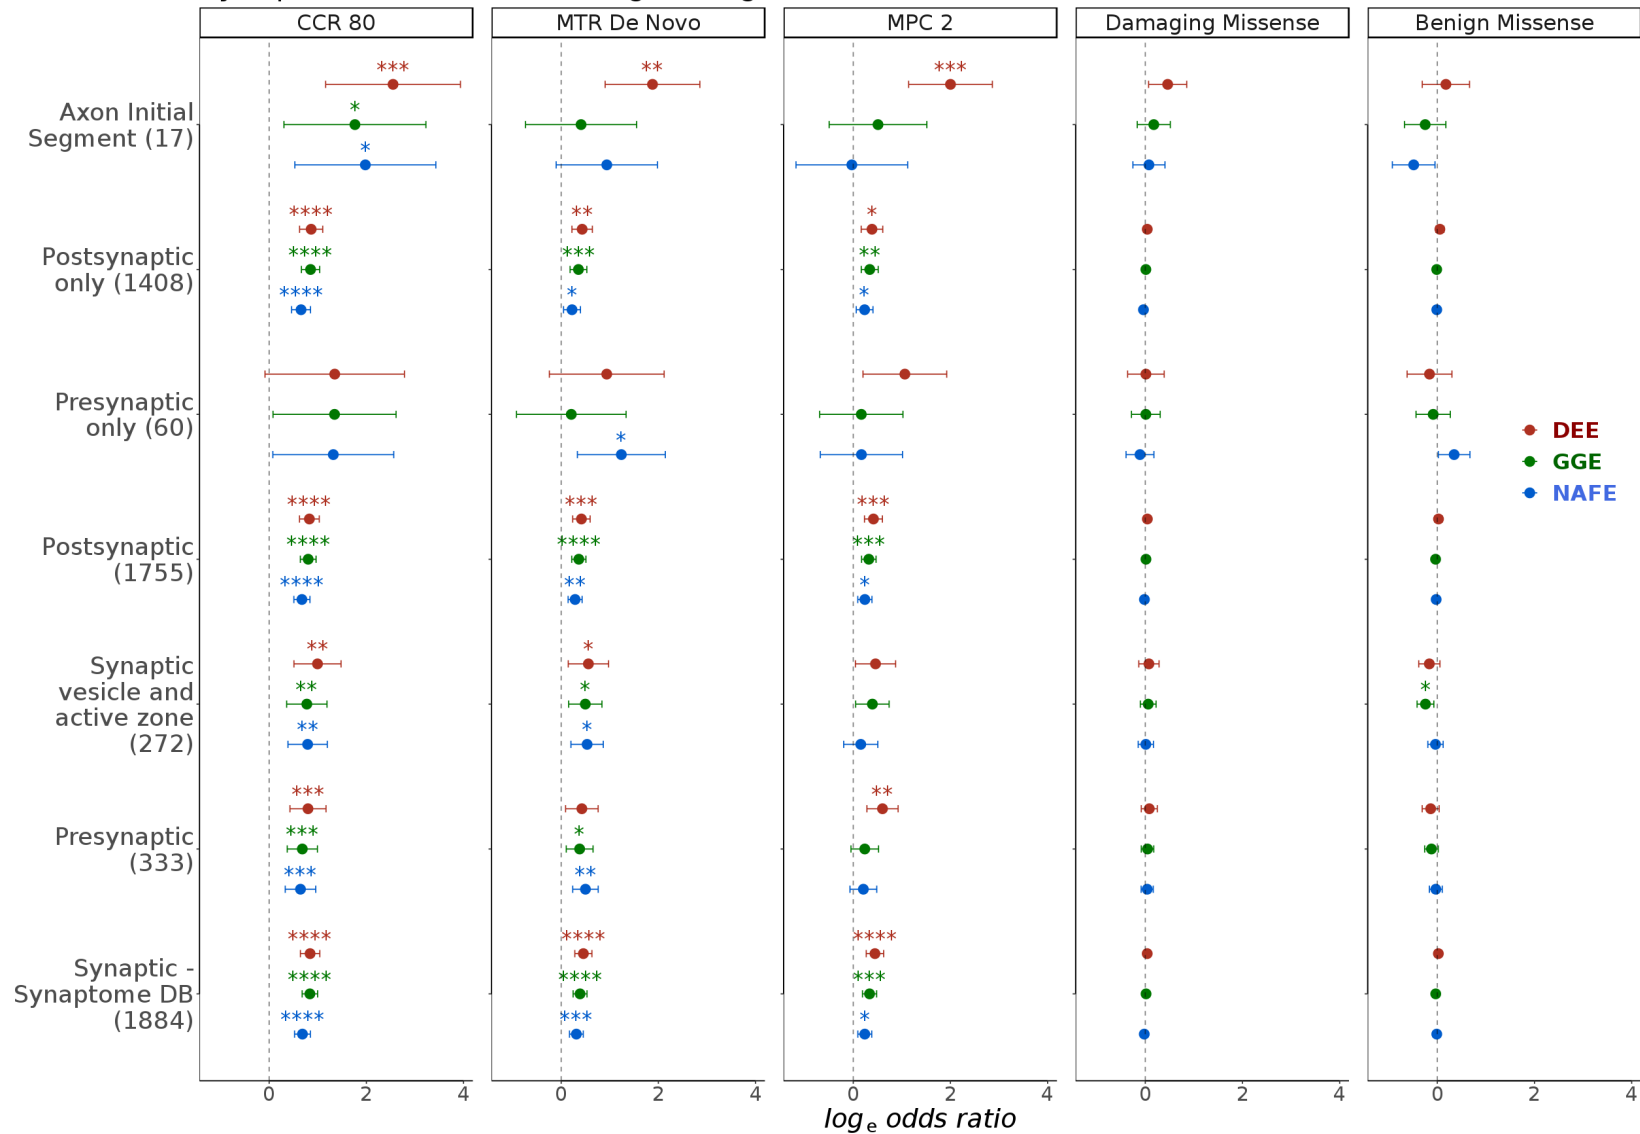

**Figure S16: Burden in groups of axon initial segment and synaptic genes.** Panels: variant classes. y axis: gene-sets (genes count between parenthesis). x axis: log odds ratio from regression analysis of individual burden of qualifying variants. Stars indicate FDR-adjusted p values: \* < 0.05, \*\* < 0.005, \*\*\* < 0.0005, \*\*\*\* < 0.00005. Error bars indicate 95% confidence intervals of odds. DEE: developmental and epileptic encephalopathies. GGE: genetic generalized epilepsies. NAFE: non-acquired focal epilepsies.

Additional neuronal sets (KEGG & Reactome databases)

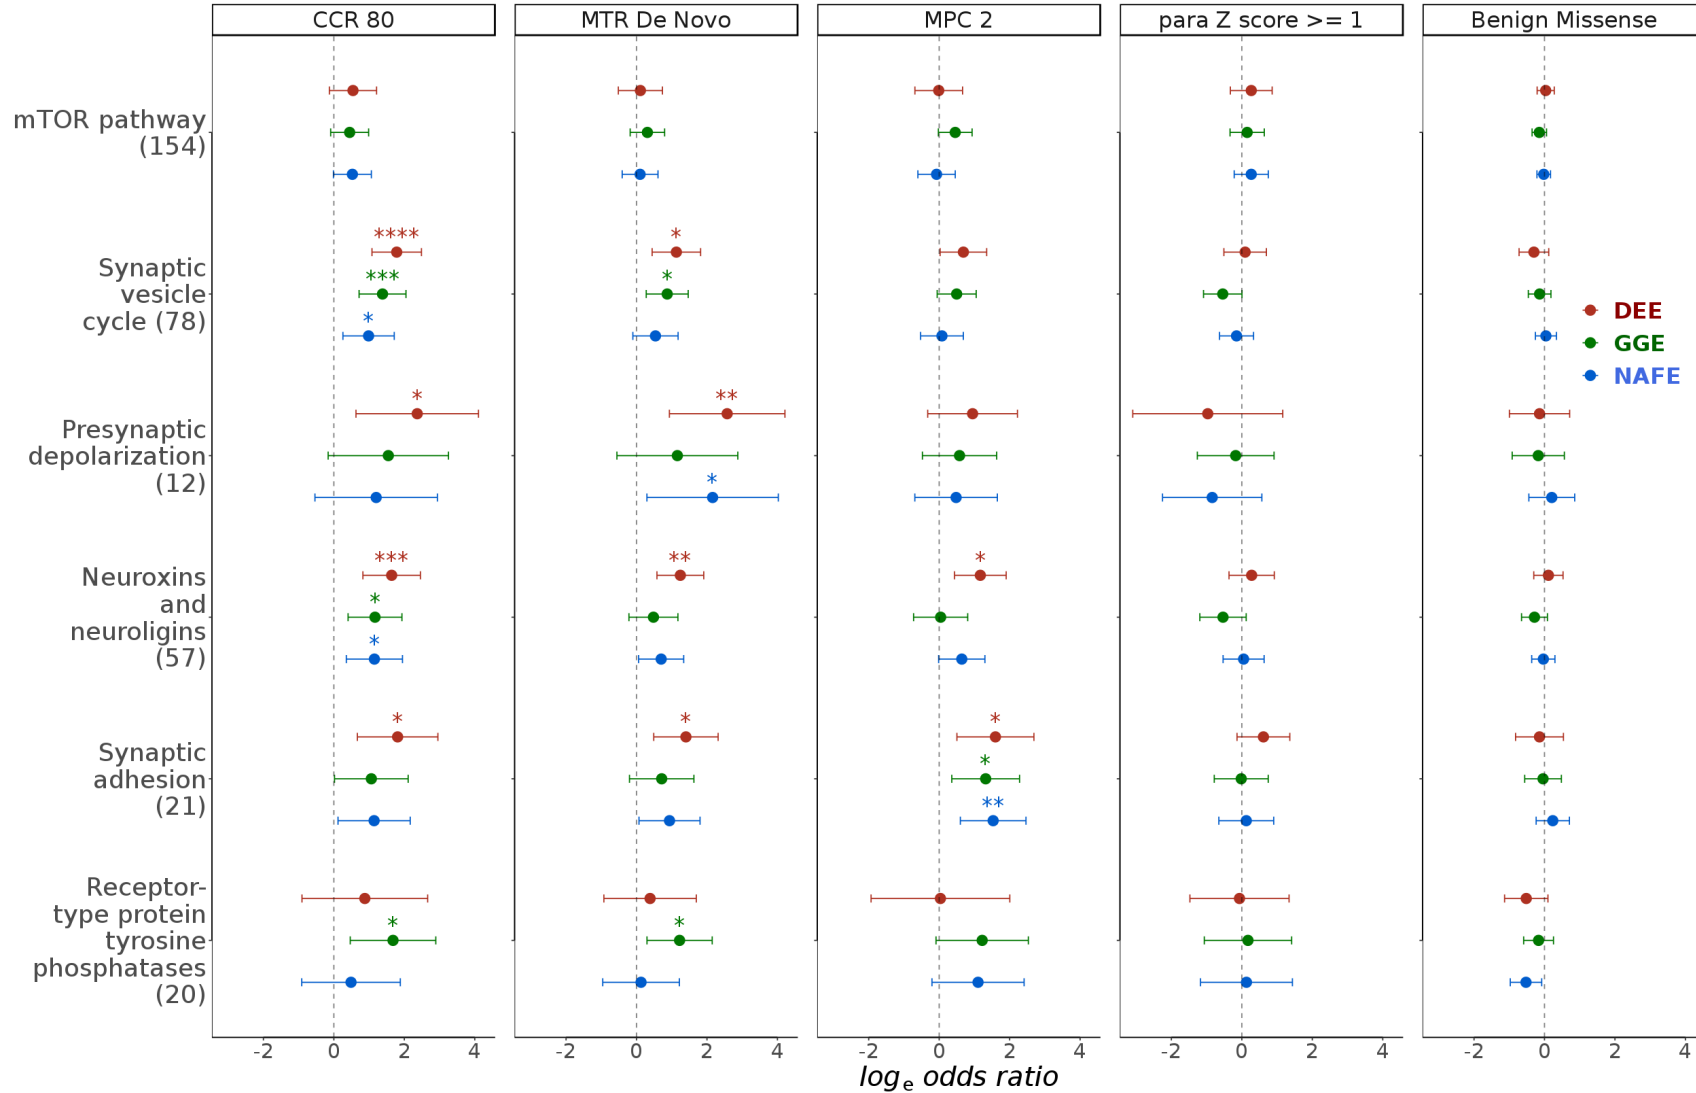

**Figure S17: Burden in neuronal gene-sets from KEGG and Reactome.** Panels: variant classes. *y* axis: gene-sets (genes count between parenthesis). *x* axis: log odds ratio from regression analysis of individual burden of qualifying variants. Stars indicate FDR-adjusted *p* values: \* < 0.05, \*\* < 0.005, \*\*\* < 0.0005, \*\*\*\* < 0.00005. Error bars indicate 95% confidence intervals of odds. DEE: developmental and epileptic encephalopathies. GGE: genetic generalized epilepsies. NAFE: non-acquired focal epilepsies.

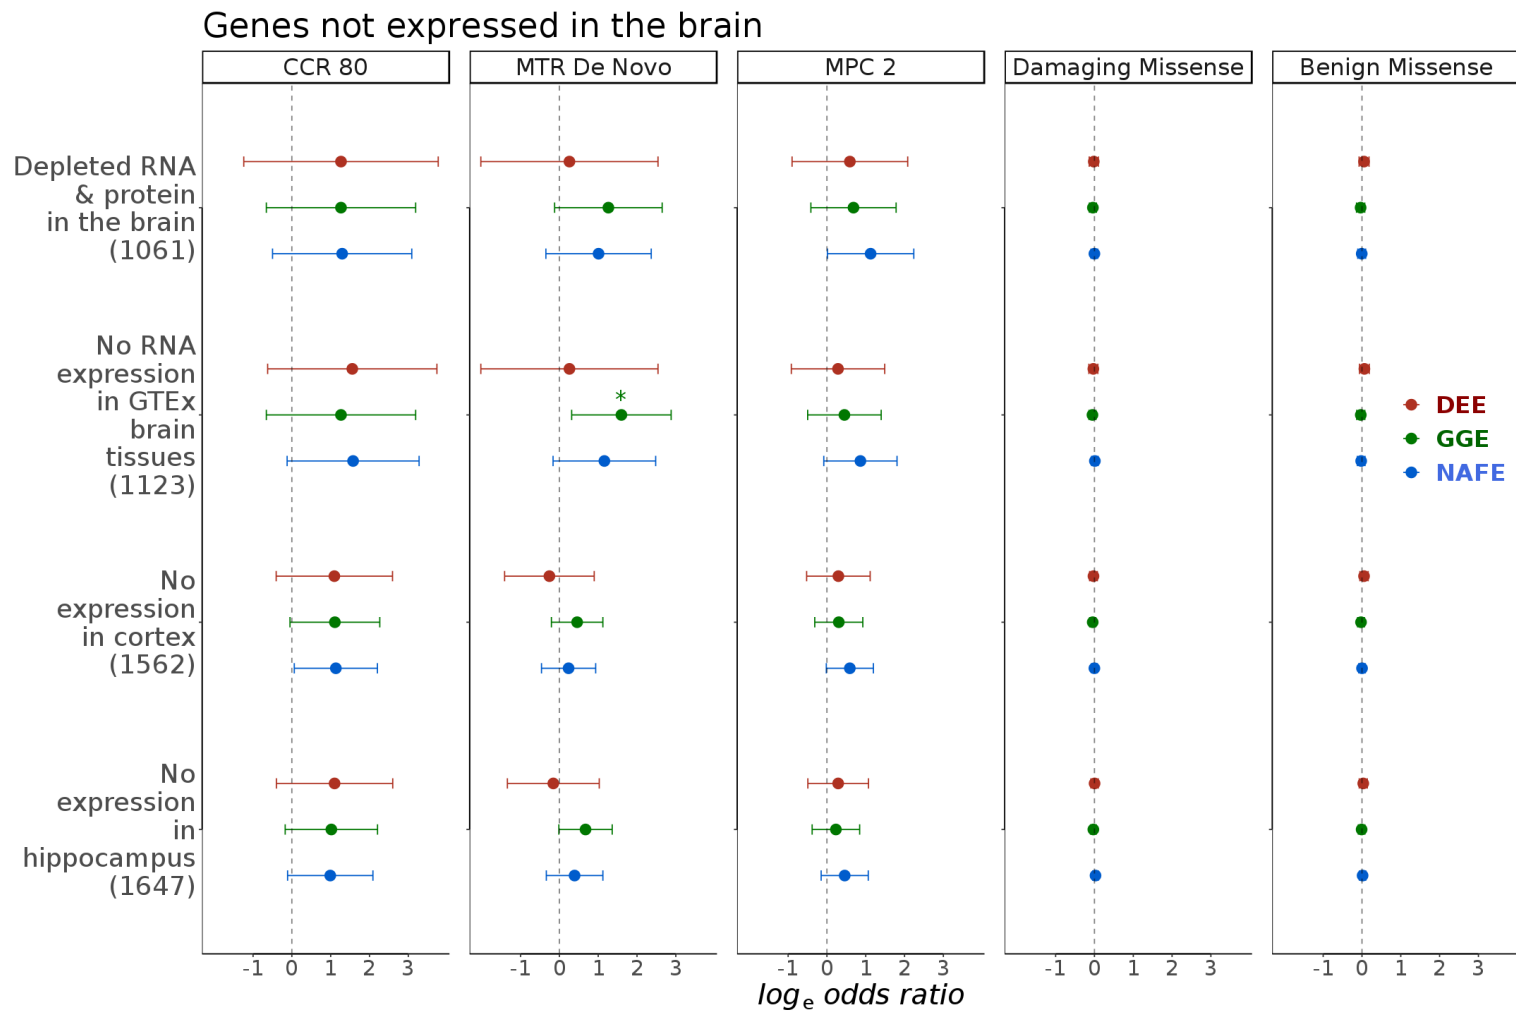

**Figure S18: Burden in groups of genes not expressed in the brain.** Panels: variant classes.  $y$  axis: gene-sets (genes count between parenthesis).  $x$  axis: log odds ratio from regression analysis of individual burden of qualifying variants. Stars indicate FDR-adjusted  $p$  values: \*  $< 0.05$ , \*\*  $< 0.005$ , \*\*\*  $< 0.0005$ , \*\*\*\*  $< 0.00005$ . Error bars indicate 95% confidence intervals of odds. DEE: developmental and epileptic encephalopathies. GGE: genetic generalized epilepsies. NAFE: non-acquired focal epilepsies.

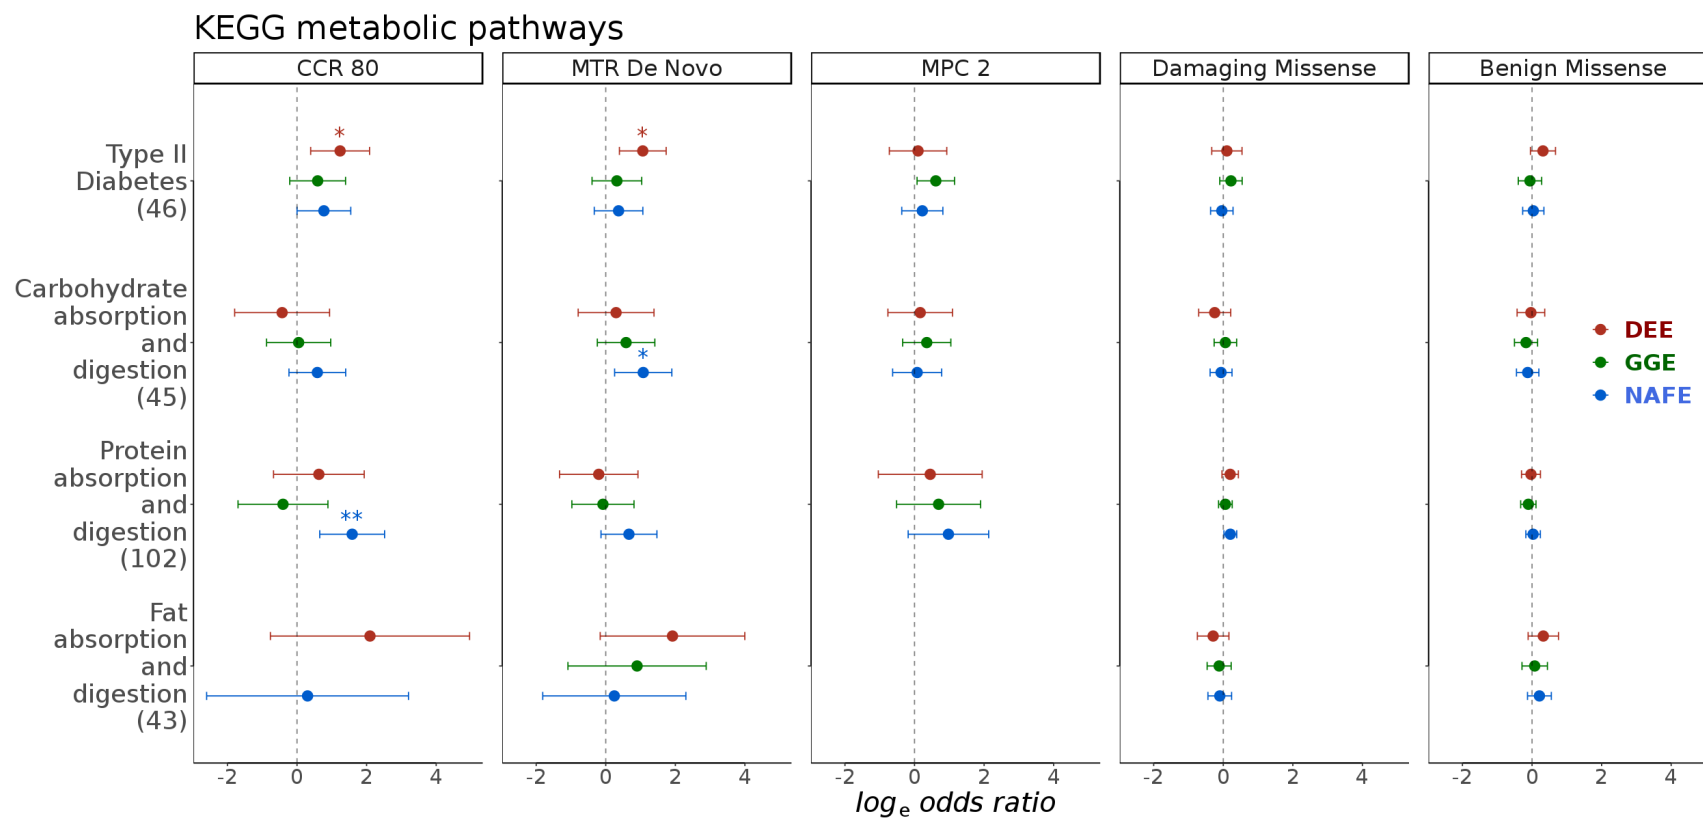

**Figure S19: Burden in gene-sets from KEGG metabolic pathways.** Panels: variant classes. y axis: gene-sets (genes count between parenthesis). x axis: log odds ratio from regression analysis of individual burden of qualifying variants. Stars indicate FDR-adjusted  $p$  values: \* < 0.05, \*\* < 0.005, \*\*\* < 0.0005, \*\*\*\* < 0.00005. Error bars indicate 95% confidence intervals of odds. DEE: developmental and epileptic encephalopathies. GGE: genetic generalized epilepsies. NAFE: non-acquired focal epilepsies. Missing odds and error bars indicate the lack of sufficient variant counts for the logistic fits to converge or that the intervals are too wide to plot on the current scale.

### KEGG Cancer pathways

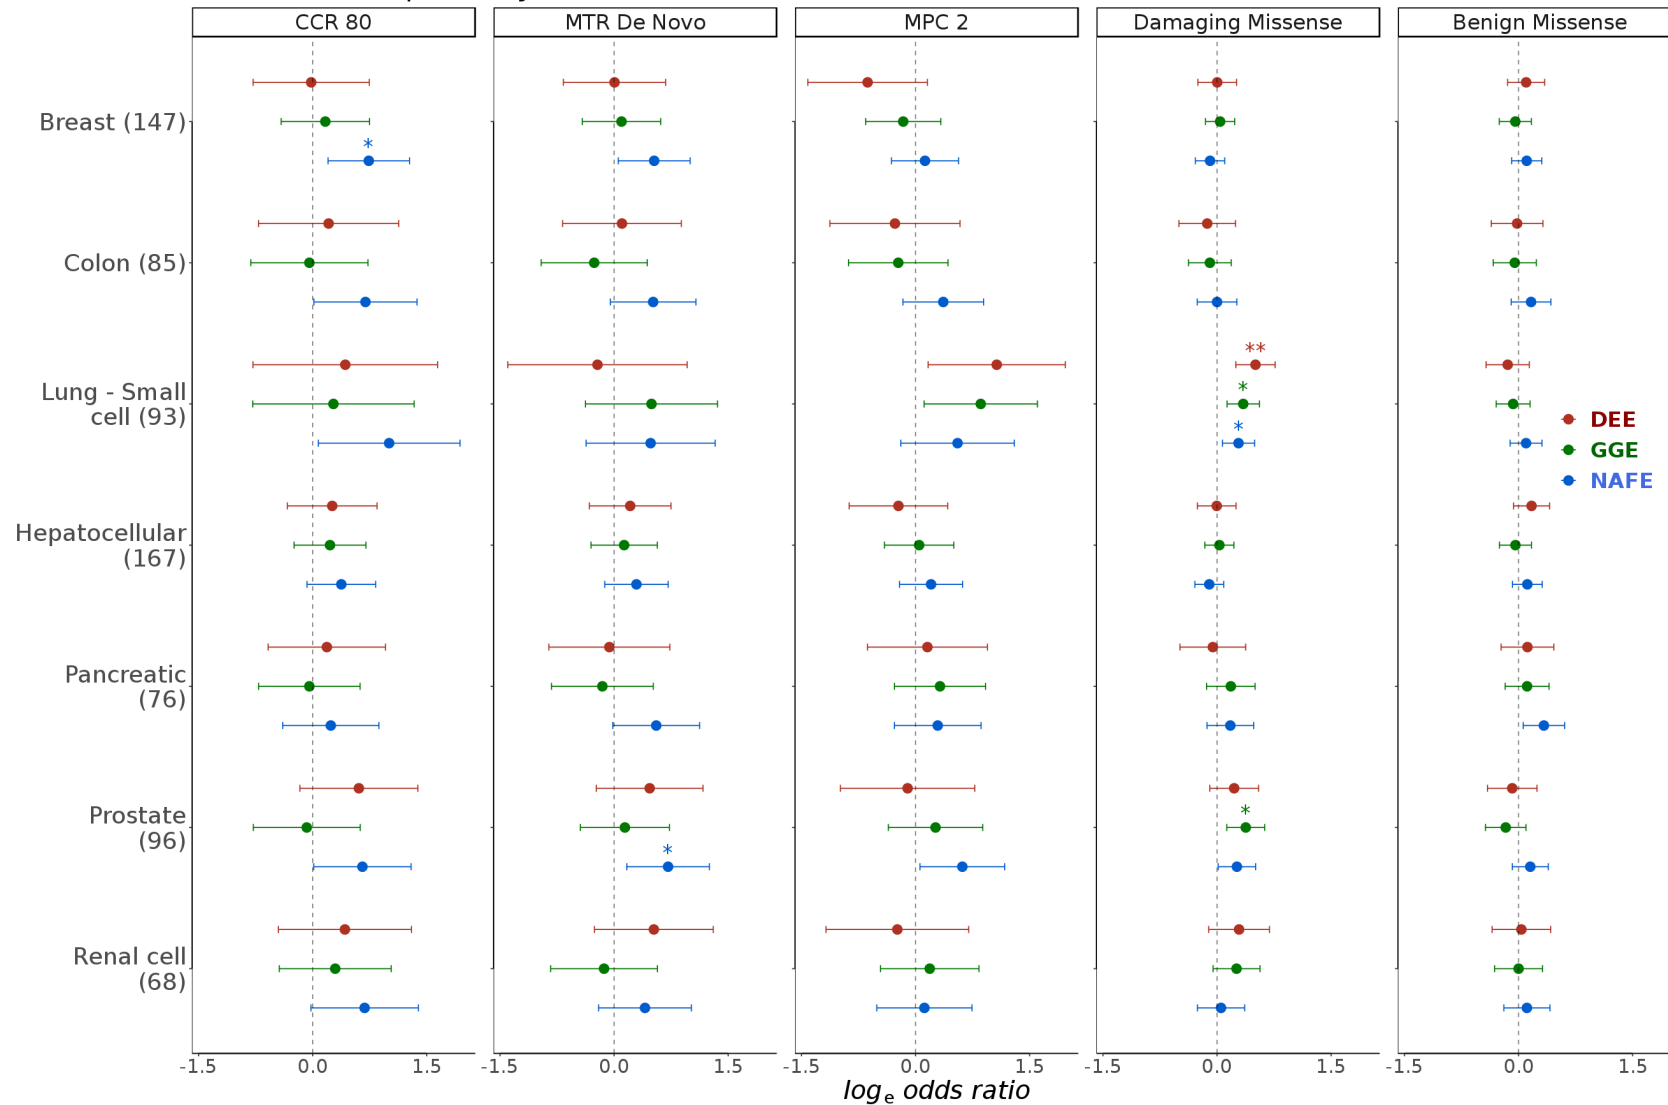

**Figure S20: Burden in gene-sets from KEGG cancer pathways.** Panels: variant classes. y axis: gene-sets (genes count between parenthesis). x axis: log odds ratio from regression analysis of individual burden of qualifying variants. Stars indicate FDR-adjusted  $p$  values: \* < 0.05, \*\* < 0.005, \*\*\* < 0.0005, \*\*\*\* < 0.00005. Error bars indicate 95% confidence intervals of odds. DEE: developmental and epileptic encephalopathies. GGE: genetic generalized epilepsies. NAFE: non-acquired focal epilepsies.

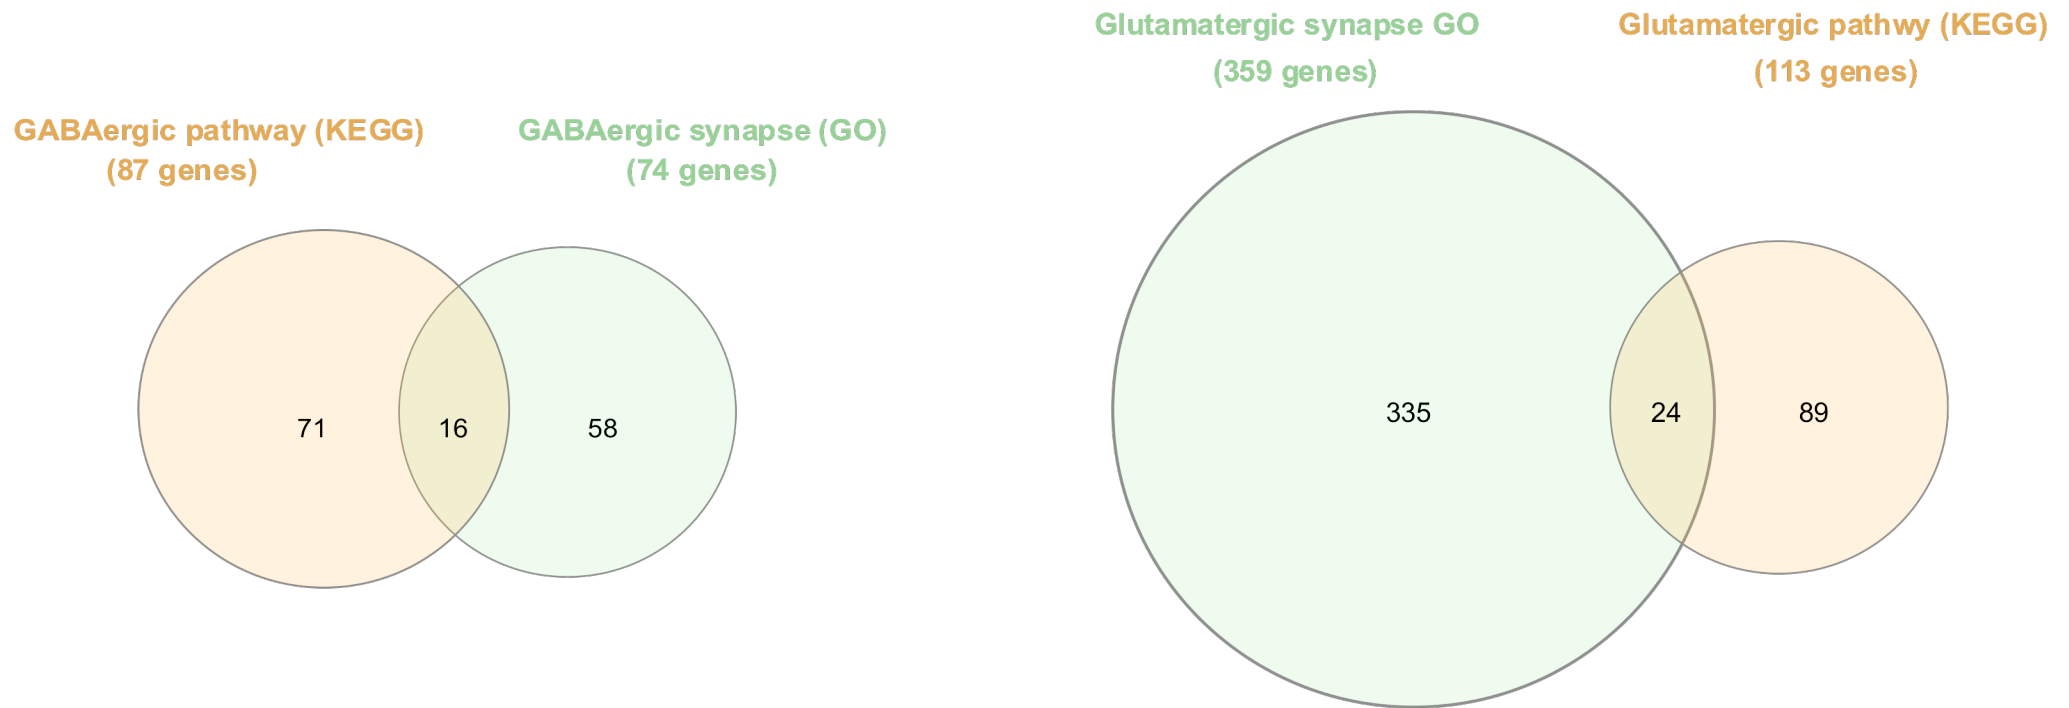

**Figure S21: Overlap between gene-sets representing the GABAergic and glutamatergic pathways (KEGG) and synapses (Gene Ontology).**  
GO: Gene Ontology.

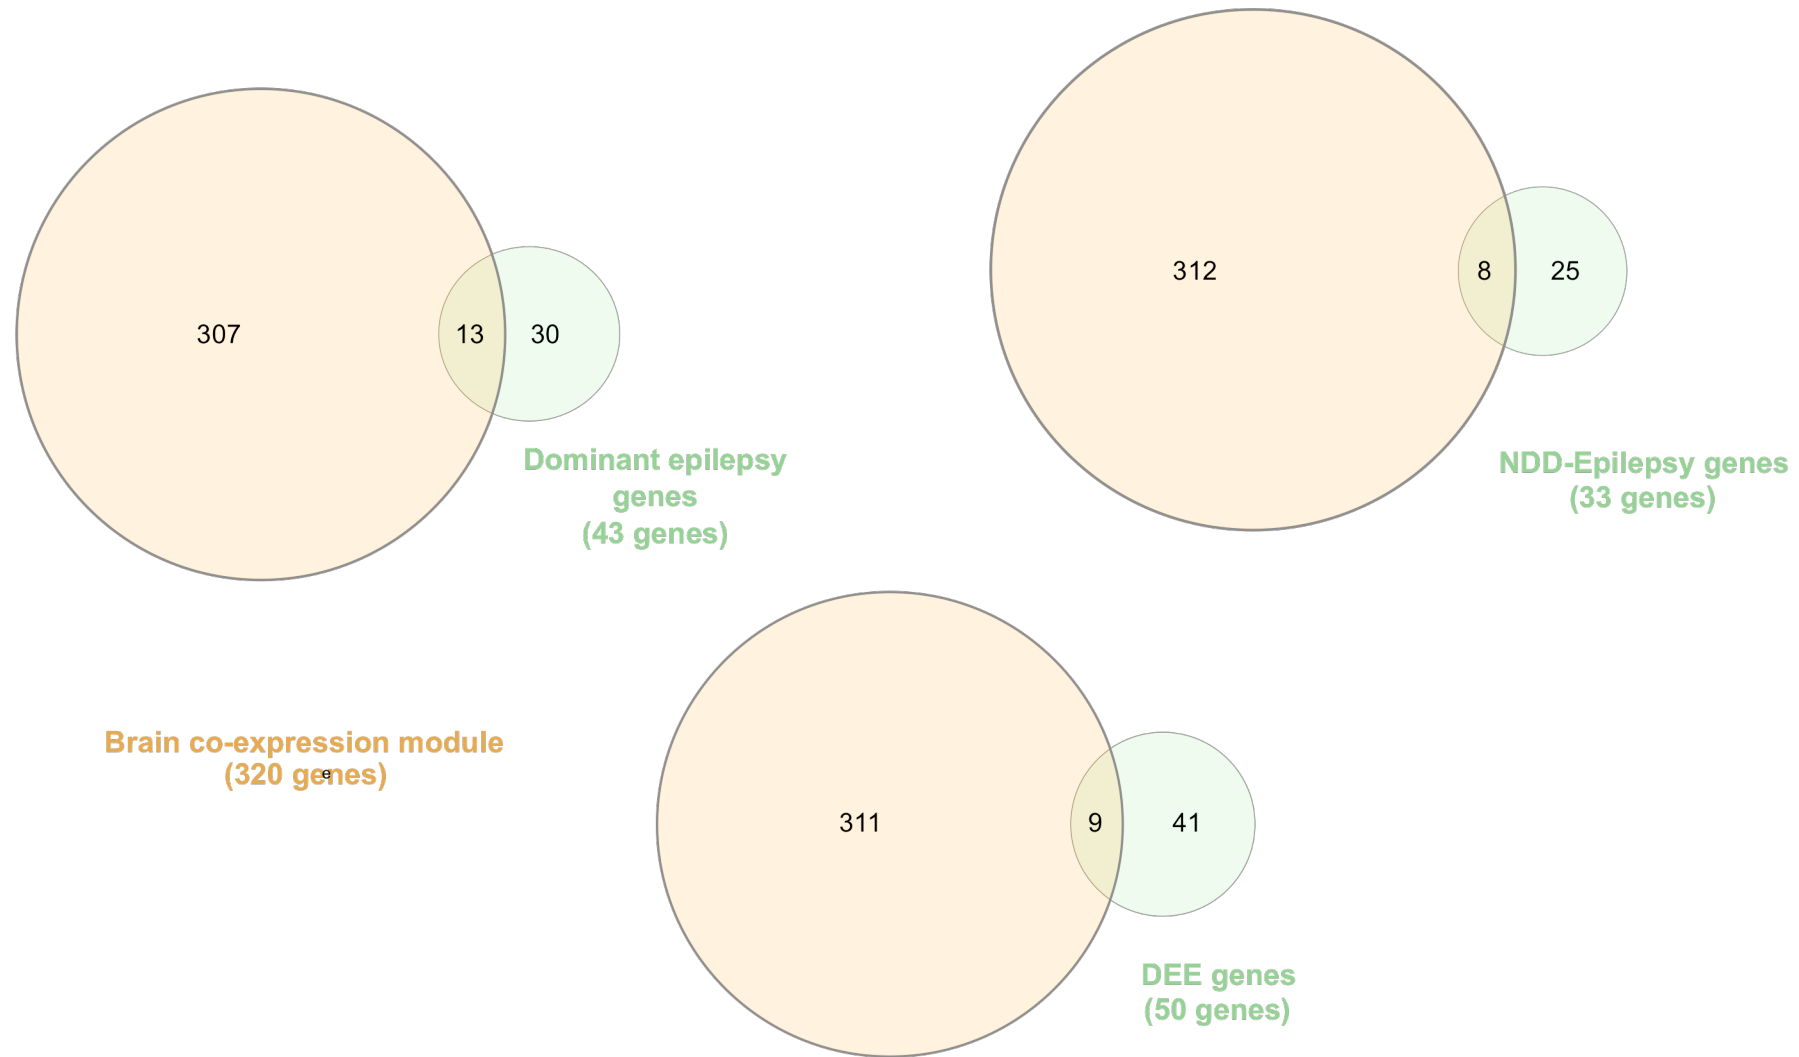

**Figure S22: Overlap between an epilepsy-related co-expression module and groups representative of known disease genes.** The overlap is shown with three groups: Dominant epilepsy, developmental and epileptic encephalopathy (DEE) and neurodevelopmental disorders (NDD) with epilepsy disease genes.



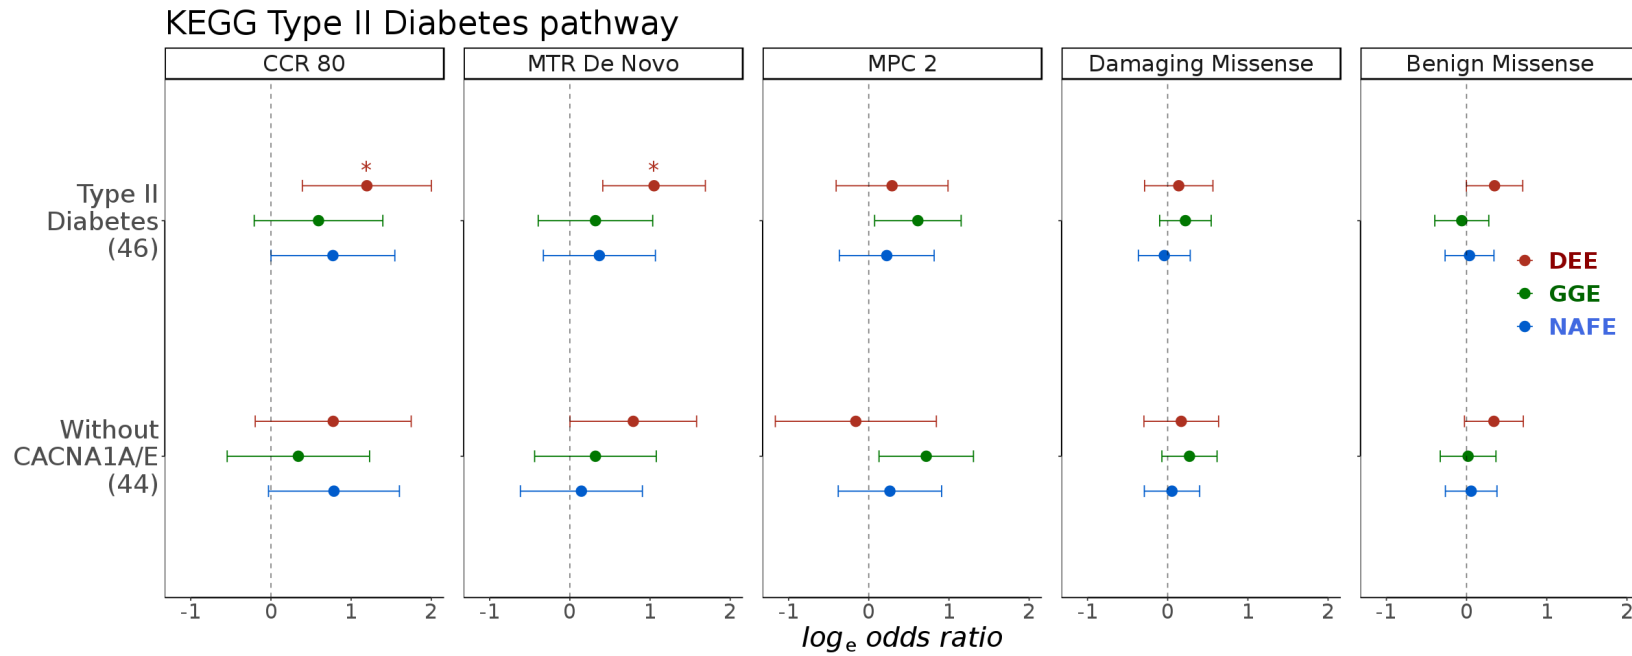

**Figure S23: Burden in KEGG Type II Diabetes pathway genes with and without *CACNA1A/E*.** Panels: variant classes. *y* axis: gene-sets (genes count between parenthesis). *x* axis: log odds ratio from regression analysis of individual burden of qualifying variants. Stars indicate FDR-adjusted *p* values: \* < 0.05, \*\* < 0.005, \*\*\* < 0.0005, \*\*\*\* < 0.00005. Error bars indicate 95% confidence intervals of odds. DEE: developmental and epileptic encephalopathies. GGE: genetic generalized epilepsies. NAFE: non-acquired focal epilepsies.

### Burden of missense variants in highly intolerant regions (CCR 80)

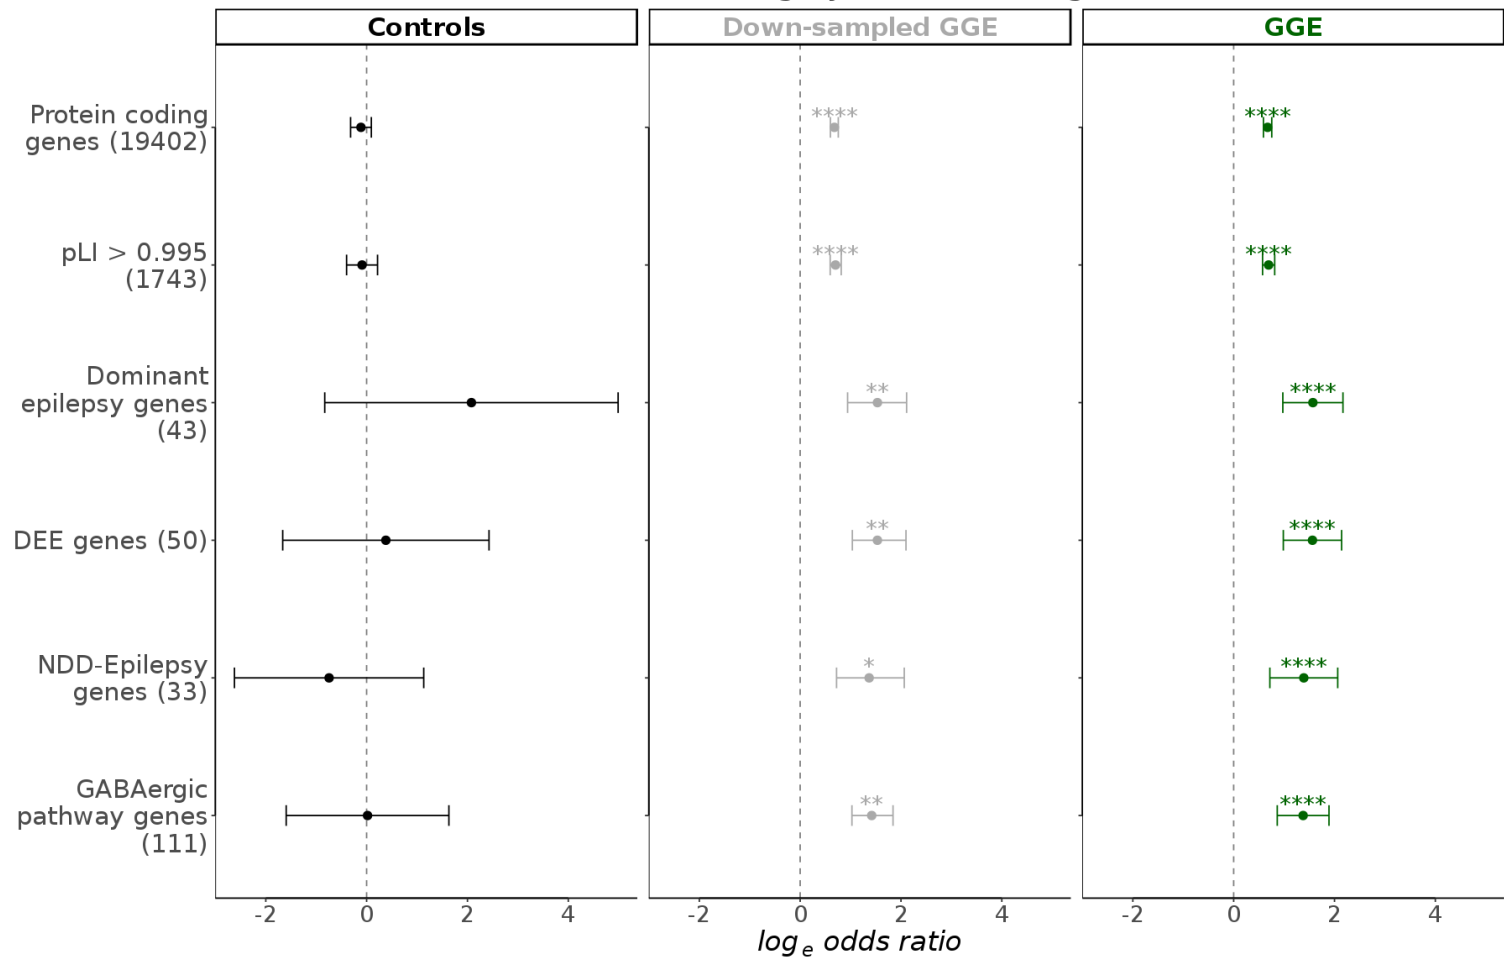

**Figure S24: Secondary analyses to exclude capture kit artifacts.** An analysis of the burden of missense variants in regions with CCR score equal to or exceeding 80 in six key gene sets in 1100 controls prepared using Illumina ICE capture kits (in gnomAD) vs. 2789 controls prepared using Agilent SureSelect kit (not in gnomAD) did not show any substantial enrichment. These numbers are likely sufficient to detect an enrichment in these gene sets based on an analysis of an equal number of randomly selected GGE cases vs. controls. The results of the analysis of all GGEs vs. all controls in these gene sets are shown for comparison. Panels: variant classes. *y* axis: gene-sets (genes count between parenthesis). *x* axis: log odds ratio from regression analysis of individual burden of qualifying variants. Stars indicate FDR-adjusted *p* values: \* < 0.05, \*\* < 0.005, \*\*\* < 0.0005, \*\*\*\* < 0.00005. Error bars indicate 95% confidence intervals of odds. For down-sampling: odds and *p* values were averaged over 500 permutation and error bars indicate 2.5<sup>th</sup> and 97.5<sup>th</sup> centiles of odds. DEE: developmental and epileptic encephalopathies. GGE: genetic generalized epilepsies. NDD: Neurodevelopmental disorders. pLI: probability of Loss-of-function intolerance score.

## Epi25 Collaborative: Authors' Information

### Epi25 sequencing, analysis, project management, and browser development at the Broad Institute:

Yen-Chen Anne Feng<sup>1,4</sup>, Daniel P. Howrigan<sup>1,3,4</sup>, Liam E. Abbott<sup>1,3,4</sup>, Katherine Tashman<sup>1,3,4</sup>, Felecia Cerrato<sup>3</sup>, Tarjinder Singh<sup>1,3,4</sup>, Henrike Heyne<sup>1,3,4</sup>, Andrea E. Byrnes<sup>1,3,4</sup>, Claire Churchhouse<sup>1,3,4</sup>, Nick Watts<sup>1,3</sup>, Matthew Solomonson<sup>1,3</sup>, Dennis Lal<sup>4,5</sup>, Namrata Gupta<sup>3</sup>, Stacey B. Gabriel<sup>146</sup>, Mark J. Daly<sup>1,3,4</sup>, Eric S. Lander<sup>146,147,148</sup>, Benjamin M. Neale<sup>1,3,4</sup>

### Epi25 executive committee:

Samuel F. Berkovic<sup>9</sup>, Holger Lerche<sup>8</sup>, David B. Goldstein<sup>6</sup>, Daniel H. Lowenstein<sup>7</sup>

### Epi25 strategy, phenotyping, analysis, informatics, and project management committees:

Samuel F. Berkovic<sup>9</sup>, Holger Lerche<sup>8</sup>, David B. Goldstein<sup>6</sup>, Daniel H. Lowenstein<sup>7</sup>, Gianpiero L. Cavalleri<sup>67,70</sup>, Patrick Cossette<sup>106</sup>, Chris Cotsapas<sup>111</sup>, Peter De Jonghe<sup>12-14</sup>, Tracy Dixon-Salazar<sup>112</sup>, Renzo Guerrini<sup>82</sup>, Hakon Hakonarson<sup>101</sup>, Erin L. Heinzen<sup>6</sup>, Ryan S. Dhindsa<sup>6</sup>, Kate E. Stanley<sup>6</sup>, Ingo Helbig<sup>28,29,102</sup>, Patrick Kwan<sup>10,11</sup>, Anthony G. Marson<sup>58</sup>, Slavé Petrovski<sup>11,116</sup>, Sitharthan Kamalakaran<sup>6</sup>, Sanjay M. Sisodiya<sup>57</sup>, Randy Stewart<sup>113</sup>, Sarah Weckhuysen<sup>12-14</sup>, Chantal Depondt<sup>15</sup>, Dennis J. Dlugos<sup>101</sup>, Ingrid E. Scheffer<sup>9</sup>, Pasquale Striano<sup>74</sup>, Catharine Freyer<sup>7</sup>, Roland Krause<sup>114</sup>, Patrick May<sup>114</sup>, Kevin McKenna<sup>7</sup>, Brigid M. Regan<sup>9</sup>, Susannah T. Bellows<sup>9</sup>, Costin Leu<sup>4,5,57</sup>

### Authors from individual Epi25 cohorts:

**Australia: Melbourne (AUSAUS):** Samuel F. Berkovic<sup>9</sup>, Ingrid E. Scheffer<sup>9</sup>, Brigid M. Regan<sup>9</sup>, Caitlin A. Bennett<sup>9</sup>, Susannah T. Bellows<sup>9</sup>, Esther M.C. Johns<sup>9</sup>, Alexandra Macdonald<sup>9</sup>, Hannah Shilling<sup>9</sup>, Rosemary Burgess<sup>9</sup>, Dorien Weckhuysen<sup>9</sup>, Melanie Bahlo<sup>119,120</sup>

**Australia: Royal Melbourne (AUSRMB):** Terence J. O'Brien<sup>10,11</sup>, Patrick Kwan<sup>10,11</sup>, Slavé Petrovski<sup>11,116</sup>, Marian Todaro<sup>10,11</sup>

**Belgium: Antwerp (BELATW):** Sarah Weckhuysen<sup>12-14</sup>, Hannah Stamberger<sup>12-14</sup>, Peter De Jonghe<sup>12-14</sup>

**Belgium: Brussels (BELULB):** Chantal Depondt<sup>15</sup>

**Canada: Andrade (CANUTN):** Danielle M. Andrade<sup>16,17</sup>, Tara R. Sadoway<sup>17</sup>, Kelly Mo<sup>17</sup>

**Switzerland: Bern (CHEUBB):** Heinz Krete<sup>118</sup>, Sabina Gallati<sup>19</sup>

**Cyprus (CYPCYP):** Savvas S. Papacostas<sup>20</sup>, Ioanna Kousiappa<sup>20</sup>, George A. Tanteles<sup>21</sup>

**Czech Republic: Prague (CZEMTH):** Katalin Štěrbová<sup>22</sup>, Markéta Vlčková<sup>23</sup>, Lucie Sedláčková<sup>22</sup>, Petra Laššuthová<sup>22</sup>

**Germany: Frankfurt/Marburg (DEUPUM):** Karl Martin Klein<sup>24,25</sup>, Felix Rosenow<sup>24,25</sup>, Philipp S. Reif<sup>24,25</sup>, Susanne Knake<sup>25</sup>

**Germany: Bonn (DEUUKB):** Wolfram S. Kunz<sup>26,27</sup>, Gábor Zsurka<sup>26,27</sup>, Christian E. Elger<sup>27</sup>, Jürgen Bauer<sup>27</sup>, Michael Rademacher<sup>27</sup>

**Germany: Kiel (DEUUKL):** Ingo Helbig<sup>28,29,102</sup>, Karl Martin Klein<sup>24,25</sup>, Manuela Pendziwiat<sup>29</sup>, Hiltrud Muhle<sup>29</sup>, Annika Rademacher<sup>29</sup>, Andreas van Baalen<sup>29</sup>, Sarah von Spiczak<sup>29</sup>, Ulrich Stephani<sup>29</sup>, Zaid Afawi<sup>30</sup>, Amos D. Korczyn<sup>31</sup>, Moien Kanaan<sup>32</sup>, Christina Canavati<sup>32</sup>, Gerhard Kurlemann<sup>33</sup>, Karen Müller-Schlüter<sup>34</sup>, Gerhard Kluger<sup>35,36</sup>, Martin Häusler<sup>37</sup>, Ilan Blatt<sup>31,115</sup>

**Germany: Leipzig (DEUULG):** Johannes R. Lemke<sup>38</sup>, Ilona Krey<sup>38</sup>

**Germany: Tübingen (DEUUTB):** Holger Lerche<sup>8</sup>, Yvonne G. Weber<sup>8,151</sup>, Stefan Wolking<sup>8</sup>, Felicitas Becker<sup>8,39</sup>, Christian Hengsbach<sup>8</sup>, Sarah Rau<sup>8</sup>, Ana F. Maisch<sup>8</sup>, Bernhard J. Steinhoff<sup>40</sup>, Andreas Schulze-Bonhage<sup>41</sup>, Susanne Schubert-Bast<sup>42</sup>, Herbert Schreiber<sup>43</sup>, Ingo Borggräfe<sup>44</sup>, Christoph J. Schankin<sup>45</sup>, Thomas Mayer<sup>46</sup>, Rudolf Korinthenberg<sup>47</sup>, Knut Brockmann<sup>48</sup>, Gerhard Kurlemann<sup>33</sup>, Dieter Dennig<sup>49</sup>, Rene Madeleyn<sup>50</sup>

**Finland: Kuopio (FINKPH):** Reetta Kälviäinen<sup>51</sup>, Pia Auvinen<sup>51</sup>, Anni Saarela<sup>51</sup>

**Finland: Helsinki (FINUVH):** Tarja Linnankivi<sup>52</sup>, Anna-Elina Lehesjoki<sup>53</sup>

**Wales: Swansea (GBRSWU):** Mark I. Rees<sup>54,55</sup>, Seo-Kyung Chung<sup>54,55</sup>, William O. Pickrell<sup>54</sup>, Robert Powell<sup>54,56</sup>

**UK: UCL (GBRUCL):** Sanjay M. Sisodiya<sup>57</sup>, Natascha Schneider<sup>57</sup>, Simona Balestrini<sup>57</sup>, Sara Zagaglia<sup>57</sup>, Vera Braatz<sup>57</sup>

**UK: Imperial/Liverpool (GBRUNL):** Anthony G. Marson<sup>58</sup>, Michael R. Johnson<sup>59</sup>, Pauls Auce<sup>60</sup>, Graeme J. Sills<sup>61</sup>

### Hong Kong (HKGHKK):

Patrick Kwan<sup>10,11,62</sup>, Larry W. Baum<sup>117,118,63</sup>, Pak C. Sham<sup>117,118,63</sup>, Stacey S. Cherny<sup>64</sup>, Colin H.T. Lui<sup>65</sup>

### Croatia (HRVUZG):

Nina Barišić<sup>66</sup>

**Ireland: Dublin (IRLRICI):** Gianpiero L. Cavalleri<sup>67,70</sup>, Norman Delanty<sup>67,70</sup>, Colin P. Doherty<sup>68,70</sup>, Arif Shukralla<sup>69</sup>, Mark McCormack<sup>67</sup>, Hany El-Naggar<sup>69,70</sup>

**Italy: Milan (ITAICB):** Laura Canafoglia<sup>71</sup>, Silvana Franceschetti<sup>71</sup>, Barbara Castellotti<sup>72</sup>, Tiziana Granata<sup>73</sup>  
**Italy: Genova (ITAIGD):** Pasquale Striano<sup>74</sup>, Federico Zara<sup>75</sup>, Michele Iacomino<sup>75</sup>, Francesca Madia<sup>75</sup>, Maria Stella Vari<sup>74</sup>, Maria Margherita Mancardi<sup>75</sup>, Vincenzo Salpietro<sup>74</sup>  
**Italy: Bologna (ITAUBG):** Francesca Bisulli<sup>76,77</sup>, Paolo Tinuper<sup>76,77</sup>, Laura Licchetta<sup>76,77</sup>, Tommaso Pippucci<sup>78</sup>, Carlotta Stipa<sup>79</sup>, Raffaella Minardi<sup>76</sup>  
**Italy: Catanzaro (ITAUMC):** Antonio Gambardella<sup>80</sup>, Angelo Labate<sup>80</sup>, Grazia Annesi<sup>81</sup>, Lorella Manna<sup>81</sup>, Monica Gagliardi<sup>81</sup>  
**Italy: Florence (ITAUMR):** Renzo Guerrini<sup>82</sup>, Elena Parrini<sup>82</sup>, Davide Mei<sup>82</sup>, Annalisa Vetro<sup>82</sup>, Claudia Bianchini<sup>82</sup>, Martino Montomoli<sup>82</sup>, Viola Doccini<sup>82</sup>, Carla Marini<sup>82</sup>  
**Japan: RIKEN Institute (JPNRKI):** Toshimitsu Suzuki<sup>83</sup>, Yushi Inoue<sup>84</sup>, Kazuhiro Yamakawa<sup>83</sup>  
**Lithuania (LTUHHK):** Birute Tumiene<sup>85,86</sup>  
**New Zealand: Otago (NZLUTO):** Lynette G. Sadleir<sup>87</sup>, Chontelle King<sup>87</sup>, Emily Mountier<sup>87</sup>  
**Turkey: Bogazici (TURBZU):** Hande S. Caglayan<sup>88</sup>, Mutluay Arslan<sup>89</sup>, Zuhale Yapıcı<sup>90</sup>, Uluc Yis<sup>91</sup>, Pınar Topaloglu<sup>90</sup>, Bulent Kara<sup>92</sup>, Dilsad Turkdogan<sup>93</sup>, Asli Gundogdu-Eken<sup>88</sup>  
**Turkey: Istanbul (TURIBU):** Nerses Bebek<sup>94,95</sup>, Sibel Uğur-İşeri<sup>95</sup>, Betül Baykan<sup>94</sup>, Barış Salman<sup>95</sup>, Garen Haryanyan<sup>94</sup>, Emrah Yücesan<sup>149</sup>, Yeşim Kesim<sup>94</sup>, Çiğdem Özkara<sup>96</sup>  
**USA: BCH (USABCH):** Annapurna Poduri<sup>97,98</sup>, Beth R. Shiedley<sup>97,98</sup>, Catherine Shain<sup>97,98</sup>  
**USA: Philadelphia/CHOP (USACHP) and Philadelphia/Rowan (USACRW):** Russell J. Bueno<sup>99,100,101</sup>, Thomas N. Ferraro<sup>99,102</sup>, Michael R. Sperling<sup>100</sup>, Dennis J. Dlugos<sup>101,102</sup>, Warren Lo<sup>103</sup>, Michael Privitera<sup>104</sup>, Jacqueline A. French<sup>105</sup>, Patrick Cossette<sup>106</sup>, Steven Schachter<sup>107</sup>, Hakon Hakonarson<sup>101</sup>  
**USA: EPGP (USAEGP):** Daniel H. Lowenstein<sup>7</sup>, Ruben I. Kuzniecky<sup>108</sup>, Dennis J. Dlugos<sup>101,102</sup>, Orrin Devinsky<sup>105</sup>  
**USA: NYU HEP (USAHEP):** Daniel H. Lowenstein<sup>7</sup>, Ruben I. Kuzniecky<sup>108</sup>, Jacqueline A. French<sup>105</sup>, Manu Hegde<sup>7</sup>  
**USA: Penn/CHOP (USAUPN):** Ingo Helbig<sup>28,102</sup>, Pouya Khankhanian<sup>109,110</sup>, Katherine L. Helbig<sup>28</sup>, Colin A. Ellis<sup>110</sup>  
**Italian controls:** Gianfranco Spalletta<sup>121,122</sup>, Fabrizio Piras<sup>121</sup>, Federica Piras<sup>121</sup>, Tommaso Gili<sup>123,121</sup>, Valentina Ciullo<sup>121,124</sup>  
**German controls:** Andreas Reif<sup>125,126</sup>  
**UK/IRL controls 1:** Andrew McQuillin<sup>127</sup>, Nick Bass<sup>127</sup>  
**UK/IRL controls 2:** Andrew McIntosh<sup>128</sup>, Douglas Blackwood<sup>128</sup>, Mandy Johnstone<sup>128</sup>  
**FINRISK controls:** Aarno Palotie<sup>1,2,4,129,130</sup>  
**Genomic Psychiatry Cohort (GPC) controls:** Michele T. Pato<sup>131</sup>, Carlos N. Pato<sup>131</sup>, Evelyn J. Bromet<sup>132</sup>, Celia Barreto Carvalho<sup>133</sup>, Eric D. Achtyes<sup>134</sup>, Maria Helena Azevedo<sup>135</sup>, Roman Kotov<sup>132</sup>, Douglas S. Lehrer<sup>136</sup>, Dolores Malaspina<sup>137</sup>, Stephen R. Marder<sup>138</sup>, Helena Medeiros<sup>131</sup>, Christopher P. Morley<sup>139</sup>, Diana O. Perkins<sup>140</sup>, Janet L. Sobell<sup>141</sup>, Peter F. Buckley<sup>142</sup>, Fabio Macciardi<sup>143</sup>, Mark H. Rapaport<sup>144</sup>, James A. Knowles<sup>131</sup>, Genomic Psychiatry Cohort (GPC) Consortium, Ayman H. Fanous<sup>131,145</sup>, Steven A. McCarrroll<sup>3,4,150</sup>

#### **Affiliations:**

<sup>1</sup> Analytic and Translational Genetics Unit, Department of Medicine, Massachusetts General Hospital and Harvard Medical School, Boston, MA 02114, USA

<sup>2</sup> Psychiatric & Neurodevelopmental Genetics Unit, Department of Psychiatry, Massachusetts General Hospital and Harvard Medical School, Boston, MA 02114, USA

<sup>3</sup> Program in Medical and Population Genetics, Broad Institute of Harvard and MIT, 7 Cambridge Center, Cambridge, MA 02142, USA

<sup>4</sup> Stanley Center for Psychiatric Research, Broad Institute of Harvard and MIT, Cambridge, MA 02142, USA

<sup>5</sup> Genomic Medicine Institute, Cleveland Clinic, Cleveland, OH 44195, USA

<sup>6</sup> Institute for Genomic Medicine, Columbia University, New York, NY 10032, USA

<sup>7</sup> Department of Neurology, University of California, San Francisco, CA 94110, USA

<sup>8</sup> Department of Neurology and Epileptology, Hertie Institute for Clinical Brain Research, University of Tübingen, 72076 Tübingen, Germany

<sup>9</sup> Epilepsy Research Centre, Department of Medicine, University of Melbourne, Victoria, Australia

<sup>10</sup> Department of Neuroscience, Central Clinical School, Monash University, Alfred Hospital, Melbourne, Australia

<sup>11</sup> Departments of Medicine and Neurology, University of Melbourne, Royal Melbourne Hospital, Parkville, Australia

<sup>12</sup> Neurogenetics Group, Center for Molecular Neurology, VIB, Antwerp, Belgium

<sup>13</sup> Laboratory of Neurogenetics, Institute Born-Bunge, University of Antwerp, Belgium

<sup>14</sup> Division of Neurology, Antwerp University Hospital, Antwerp, Belgium

- <sup>15</sup> Department of Neurology, Université Libre de Bruxelles, Brussels, Belgium
- <sup>16</sup> Department of Neurology, Toronto Western Hospital, Toronto, ON M5T 2S8, Canada
- <sup>17</sup> University Health Network, University of Toronto, Toronto, ON, Canada
- <sup>18</sup> Departments of Neurology and BioMedical Research, Bern University Hospital and University of Bern, Bern, Switzerland
- <sup>19</sup> Institute of Human Genetics, Bern University Hospital, Bern, Switzerland
- <sup>20</sup> Neurology Clinic B, The Cyprus Institute of Neurology and Genetics, 2370 Nicosia, Cyprus
- <sup>21</sup> Department of Clinical Genetics, The Cyprus Institute of Neurology and Genetics, 2370 Nicosia, Cyprus
- <sup>22</sup> Department of Paediatric Neurology, 2nd Faculty of Medicine, Charles University and Motol Hospital, Prague, Czech Republic
- <sup>23</sup> Department of Biology and Medical Genetics, 2nd Faculty of Medicine, Charles University and Motol Hospital, Prague, Czech Republic
- <sup>24</sup> Epilepsy Center Frankfurt Rhine-Main, Center of Neurology and Neurosurgery, Goethe University Frankfurt, Frankfurt, Germany
- <sup>25</sup> Epilepsy Center Hessen-Marburg, Department of Neurology, Philipps University Marburg, Marburg, Germany
- <sup>26</sup> Institute of Experimental Epileptology and Cognition Research, University Bonn, 53127 Bonn, Germany
- <sup>27</sup> Department of Epileptology, University Bonn, 53127 Bonn, Germany
- <sup>28</sup> Division of Neurology, Children's Hospital of Philadelphia, Philadelphia, PA 19104, USA
- <sup>29</sup> Department of Neuropediatrics, Christian-Albrechts-University of Kiel, 24105 Kiel, Germany
- <sup>30</sup> Sackler School of Medicine, Tel-Aviv University, Ramat Aviv, Israel
- <sup>31</sup> Tel-Aviv University Sackler Faculty of Medicine, Ramat Aviv 69978, Israel
- <sup>32</sup> Hereditary Research Lab, Bethlehem University, Bethlehem, Palestine
- <sup>33</sup> Department of Neuropediatrics, Westfälische Wilhelms-University, Münster, Germany
- <sup>34</sup> Epilepsy Center for Children, University Hospital Neuruppin, Brandenburg Medical School, Neuruppin, Germany
- <sup>35</sup> Neuropediatric Clinic and Clinic for Neurorehabilitation, Epilepsy Center for Children and Adolescents, Vogtareuth, Germany
- <sup>36</sup> Research Institute Rehabilitation / Transition / Palliation, PMU Salzburg, Austria
- <sup>37</sup> Division of Neuropediatrics and Social Pediatrics, Department of Pediatrics, University Hospital, RWTH Aachen, Aachen, Germany
- <sup>38</sup> Institute of Human Genetics, Leipzig, Germany
- <sup>39</sup> RKU-University Neurology Clinic of Ulm, Ulm, Germany
- <sup>40</sup> Kork Epilepsy Center, Kehl-Kork, Germany
- <sup>41</sup> Epilepsy Center, University of Freiburg, Freiburg im Breisgau, Germany
- <sup>42</sup> Section Neuropediatrics and Inborn Errors of Metabolism, University Children's Hospital, Heidelberg, Germany
- <sup>43</sup> Neurological Practice Center & Neuropoint Patient Academy, Ulm, Germany
- <sup>44</sup> Department of Pediatric Neurology and Developmental Medicine, LMU Munich, Munich, Germany
- <sup>45</sup> Department of Neurology, University of Munich Hospital-Großhadern, Munich, Germany
- <sup>46</sup> Saxonian Epilepsy Center Radeberg, Radeberg, Germany
- <sup>47</sup> Division of Neuropediatrics and Muscular Disorders, University Hospital Freiburg, Freiburg, Germany
- <sup>48</sup> University Children's Hospital, Göttingen, Germany
- <sup>49</sup> Private Neurological Practice, Stuttgart, Germany
- <sup>50</sup> Department of Pediatrics, Filderklinik, Filderstadt, Germany
- <sup>51</sup> Neurocenter, Kuopio University Hospital, Kuopio Finland and Institute of Clinical Medicine, University of Eastern Finland, Finland
- <sup>52</sup> Child Neurology, University of Helsinki and Helsinki University Hospital, Helsinki, Finland
- <sup>53</sup> Medicum, University of Helsinki, Helsinki, Finland and Folkhälsan Research Center, Helsinki, Finland
- <sup>54</sup> Neurology Research Group, Swansea University Medical School, Swansea University SA2 8PP, UK
- <sup>55</sup> Faculty of Medicine and Health, University of Sydney, Sydney, Australia
- <sup>56</sup> Department of Neurology, Morriston Hospital, Abertawe Bro Morgannwg HealthBoard, Swansea, UK
- <sup>57</sup> Department of Clinical and Experimental Epilepsy, UCL Queen Square Institute of Neurology, London, UK and Chalfont Centre for Epilepsy, Chalfont St Peter, UK
- <sup>58</sup> Department of Molecular and Clinical Pharmacology, University of Liverpool, Liverpool, UK
- <sup>59</sup> Division of Brain Sciences, Imperial College London, London, UK
- <sup>60</sup> Department of Neurology, Walton Centre NHS Foundation Trust, Liverpool, UK
- <sup>61</sup> School of Life Sciences, University of Glasgow, Glasgow, UK
- <sup>62</sup> Department of Medicine and Therapeutics, Chinese University of Hong Kong, Hong Kong, China
- <sup>63</sup> Department of Psychiatry, University of Hong Kong, Hong Kong, China
- <sup>64</sup> Department of Epidemiology and Preventive Medicine and Department of Anatomy and Anthropology, Sackler Faculty of Medicine, Tel Aviv University, Israel

- <sup>65</sup> Department of Medicine, Tseung Kwan O Hospital, Hong Kong, China
- <sup>66</sup> Department of Pediatric University Hospital centre Zagreb, Croatia
- <sup>67</sup> The Department of Molecular and Cellular Therapeutics, The Royal College of Surgeons in Ireland, Dublin, Ireland
- <sup>68</sup> Neurology Department, St. James Hospital, Dublin, Ireland
- <sup>69</sup> The Department of Neurology, Beaumont Hospital, Dublin, Ireland
- <sup>70</sup> The FutureNeuro Research Centre, Ireland
- <sup>71</sup> Neurophysiopathology, Fondazione IRCCS Istituto Neurologico Carlo Besta, Milan, Italy
- <sup>72</sup> Unit of Genetics of Neurodegenerative and Metabolic Diseases, Fondazione IRCCS Istituto Neurologico Carlo Besta, Milan, Italy
- <sup>73</sup> Department of Pediatric Neuroscience, Fondazione IRCCS Istituto Neurologico Carlo Besta, Milan, Italy
- <sup>74</sup> Pediatric Neurology and Muscular Diseases Unit, Department of Neurosciences, Rehabilitation, Ophthalmology, Genetics, Maternal and Child Health, University of Genoa, "G. Gaslini" Institute, Genova, Italy
- <sup>75</sup> Laboratory of Neurogenetics, "G. Gaslini" Institute, Genova, Italy
- <sup>76</sup> IRCCS, Institute of Neurological Sciences of Bologna, Bologna, Italy
- <sup>77</sup> Department of Biomedical and Neuromotor Sciences, University of Bologna, Bologna, Italy
- <sup>78</sup> Medical Genetics Unit, Polyclinic Sant'Orsola-Malpighi University Hospital, Bologna, Italy
- <sup>79</sup> Department of Biomedical and Neuromotor Sciences, University of Bologna, Bologna, Italy
- <sup>80</sup> Institute of Neurology, Department of Medical and Surgical Sciences, University "Magna Graecia", Catanzaro, Italy
- <sup>81</sup> Institute of Molecular Bioimaging and Physiology, CNR, Section of Germaneto, Catanzaro, Italy
- <sup>82</sup> Pediatric Neurology, Neurogenetics and Neurobiology Unit and Laboratories, Children's Hospital A. Meyer, University of Florence, Italy
- <sup>83</sup> Laboratory for Neurogenetics, RIKEN Center for Brain Science, Saitama, Japan
- <sup>84</sup> National Epilepsy Center, Shizuoka Institute of Epilepsy and Neurological Disorder, Shizuoka, Japan
- <sup>85</sup> Institute of Biomedical Sciences, Faculty of Medicine, Vilnius University, Vilnius, Lithuania
- <sup>86</sup> Centre for Medical Genetics, Vilnius University Hospital Santaros Klinikos, Vilnius, Lithuania
- <sup>87</sup> Department of Paediatrics and Child Health, University of Otago, Wellington
- <sup>88</sup> Department of Molecular Biology and Genetics, Bogaziçi University, Istanbul, Turkey
- <sup>89</sup> Department of Child Neurology, Gulhane Education and Research Hospital, Health Sciences University, Ankara, Turkey
- <sup>90</sup> Department of Child Neurology, Istanbul Faculty of Medicine, Istanbul University, Istanbul, Turkey
- <sup>91</sup> Department of Child Neurology, Medical School, Dokuz Eylul University, Izmir, Turkey
- <sup>92</sup> Department of Child Neurology, Medical School, Kocaeli University, Kocaeli, Turkey
- <sup>93</sup> Department of Child Neurology, Medical School, Marmara University, Istanbul, Turkey
- <sup>94</sup> Department of Neurology, Istanbul Faculty of Medicine, Istanbul University, Istanbul, Turkey
- <sup>95</sup> Department of Genetics, Aziz Sancar Institute of Experimental Medicine, Istanbul University, Istanbul, Turkey
- <sup>96</sup> Department of Neurology, Faculty of Medicine, Cerrahpaşa University Istanbul, Istanbul, Turkey
- <sup>97</sup> Epilepsy Genetics Program, Department of Neurology, Boston Children's Hospital, Boston, MA 02115, USA
- <sup>98</sup> Department of Neurology, Harvard Medical School, Boston, MA 02115, USA
- <sup>99</sup> Cooper Medical School of Rowan University, Camden, NJ 08103, USA
- <sup>100</sup> Thomas Jefferson University, Philadelphia, PA 19107, USA
- <sup>101</sup> The Children's Hospital of Philadelphia, Philadelphia, PA 19104, USA
- <sup>102</sup> Perelman School of Medicine, University of Pennsylvania, PA 19104, USA
- <sup>103</sup> Nationwide Children's Hospital, Columbus, OH 43205, USA
- <sup>104</sup> University of Cincinnati, Cincinnati, OH 45220, USA
- <sup>105</sup> Department of Neurology, New York University/Langone Health, New York, NY 10016, USA
- <sup>106</sup> University of Montreal, Montreal, QC H3T 1J4, Canada
- <sup>107</sup> Beth Israel Deaconess/Harvard, Boston, MA 02115, USA
- <sup>108</sup> Department of Neurology, Hofstra-Northwell Medical School, New York, NY 11549, USA
- <sup>109</sup> Center for Neuro-engineering and Therapeutics, University of Pennsylvania, Philadelphia, PA 19104, USA
- <sup>110</sup> Department of Neurology, Hospital of University of Pennsylvania, Philadelphia, PA 19104, USA
- <sup>111</sup> School of Medicine, Yale University, New Haven, CT 06510, USA
- <sup>112</sup> LGS Foundation, NY 11716, USA
- <sup>113</sup> National Institute of Neurological Disorders and Stroke, MD 20852, USA
- <sup>114</sup> Luxembourg Centre for Systems Biomedicine, University Luxembourg, Esch-sur-Alzette, Luxembourg
- <sup>115</sup> Department of Neurology, Sheba Medical Center, Ramat Gan, Israel
- <sup>116</sup> Centre for Genomics Research, Precision Medicine and Genomics, IMED Biotech Unit, AstraZeneca, Cambridge, UK
- <sup>117</sup> The State Key Laboratory of Brain and Cognitive Sciences, University of Hong Kong, Hong Kong, China

- <sup>118</sup> Centre for Genomic Sciences, University of Hong Kong, Hong Kong, China
- <sup>119</sup> Population Health and Immunity Division, the Walter and Eliza Hall Institute of Medical Research, Parkville 3052, VIC, Australia
- <sup>120</sup> Department of Medical Biology, The University of Melbourne, Melbourne 3010, VIC, Australia
- <sup>121</sup> Neuropsychiatry Laboratory, IRCCS Santa Lucia Foundation, Rome, Italy
- <sup>122</sup> Division of Neuropsychiatry, Menninger Department of Psychiatry and Behavioral Sciences, Baylor College of Medicine, Houston, TX, USA
- <sup>123</sup> IMT School for Advanced Studies Lucca, Lucca, Italy
- <sup>124</sup> Department of Neurosciences, Psychology, Drug Research and Child Health, University of Florence, Florence, Italy
- <sup>125</sup> Department of Psychiatry, Psychosomatic Medicine and Psychotherapy, University Hospital Frankfurt
- <sup>126</sup> Department of Psychiatry, Psychotherapy and Psychosomatics, University Hospital Würzburg
- <sup>127</sup> Division of Psychiatry, University College London, London, UK
- <sup>128</sup> Division of Psychiatry, Centre for Clinical Brain Sciences, University of Edinburgh, Edinburgh, UK
- <sup>129</sup> Institute for Molecular Medicine Finland, University of Helsinki, 00014, Finland
- <sup>130</sup> Department of Neurology, Massachusetts General Hospital, Boston, MA, USA
- <sup>131</sup> Department of Psychiatry and Behavioral Sciences, SUNY Downstate Medical Center, Brooklyn, NY, USA
- <sup>132</sup> Department of Psychiatry, Stony Brook University, Stony Brook, NY, USA
- <sup>133</sup> Faculty of Social and Human Sciences, University of Azores, PT
- <sup>134</sup> Cherry Health and Michigan State University College of Human Medicine, Grand Rapids, MI, USA
- <sup>135</sup> Institute of Medical Psychology, Faculty of Medicine, University of Coimbra, Coimbra, PT
- <sup>136</sup> Department of Psychiatry, Wright State University, Dayton, OH, USA
- <sup>137</sup> Departments of Psychiatry, Genetics & Genomics, Icahn School of Medicine at Mount Sinai, NY, USA
- <sup>138</sup> Semel Institute for Neuroscience at UCLA, Los Angeles, CA, USA
- <sup>139</sup> Departments of Public Health and Preventive Medicine, Family Medicine, and Psychiatry and Behavioral Sciences, State University of New York, Upstate Medical University, Syracuse, NY, USA
- <sup>140</sup> Department of Psychiatry, University of North Carolina, Chapel Hill, NC, USA
- <sup>141</sup> Department of Psychiatry & Behavioral Sciences, University of Southern California, Los Angeles, CA, USA
- <sup>142</sup> Department of Psychiatry, Virginia Commonwealth University School of Medicine, Richmond, VA, USA
- <sup>143</sup> Department of Psychiatry and Human Behavior, University of California, Irvine, CA, USA
- <sup>144</sup> Department of Psychiatry and Behavioral Sciences, Emory University, Atlanta, GA, USA
- <sup>145</sup> Department of Psychiatry, Veterans Administration New York Harbor Healthcare System, Brooklyn, NY, USA
- <sup>146</sup> Broad Institute of MIT and Harvard, Cambridge, MA, USA
- <sup>147</sup> Department of Biology, Massachusetts Institute of Technology, Cambridge, MA, USA
- <sup>148</sup> Department of Systems Biology, Harvard Medical School, Boston, MA, USA
- <sup>149</sup> Bezmialem Vakif University, Institute of Life Sciences and Biotechnology, Istanbul, Turkey
- <sup>150</sup> Department of Genetics, Harvard Medical School, Boston, MA, USA
- <sup>151</sup> Department of Neurosurgery, University of Tübingen, Tübingen, Germany
